# Supplementary material for: In-silico genome wide analysis of Mitogen activated protein kinase kinase kinase gene family in C. sinensis
Source: PubMed Central journal article supplement (PMC8568164; doi:10.1371/journal.pone.0258657), 2021-11-04
Supplement: pone.0258657.s002.pdf [file pone.0258657.s002.pdf]

# ***In-silico* genome wide analysis of Mitogen Activated Protein Kinase Kinase Kinase gene family in *C. sinensis***

Abhirup Paul<sup>1†</sup>, Anurag P. Srivastava<sup>2†</sup>, Shreya Subrahmanya<sup>3</sup>, Guoxin Shen<sup>4†\*</sup>, Neelam Mishra<sup>3\*</sup>

<sup>1</sup>Department of Biochemistry

REVA University  
Bangalore, Karnataka,  
India

<sup>2</sup>Department of life Sciences

Garden City University  
Bangalore, Karnataka,  
India

<sup>3</sup>Department of Botany

St. Joseph's College autonomous  
Bangalore, Karnataka,  
India

<sup>4</sup>Sericultural Research Institute,

Zhejiang Academy of Agricultural Sciences  
Hangzhou 310021, China

†These authors contributed equally to this work.

\*Corresponding authors:

Guoxin Shen, Ph.D., Professor, Tel: +86-571-86404298; Fax: +86-571-86404298

Email address: [guoxin.shen@ttu.edu](mailto:guoxin.shen@ttu.edu)

Neelam Mishra, Ph.D., Assistant professor

Email address: [neelamiitkgp@gmail.com](mailto:neelamiitkgp@gmail.com); [neelammishra@sjc.ac.in](mailto:neelammishra@sjc.ac.in)

Orcid id:

1. Abhirup Paul: 0000-0003-2143-7511
2. Neelam Mishra: 0000-0001-6191-5392

# **TEA028357.1** Length: 628  
 # TEA028357.1 Number of predicted TMHs: 0  
 # TEA028357.1 Exp number of AAs in TMHs: 0.02198  
 # TEA028357.1 Exp number, first 60 AAs: 0.00018  
 # TEA028357.1 Total prob of N-in: 0.00262  
 TEA028357.1 TMHMM2.0 outside 1 628

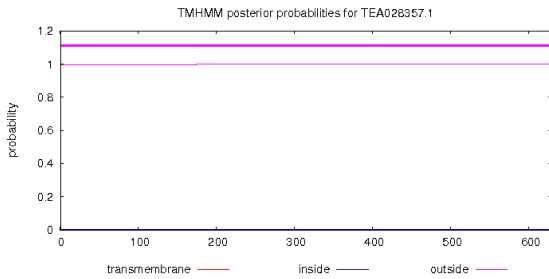

# **TEA025870.1** Length: 776  
 # TEA025870.1 Number of predicted TMHs: 0  
 # TEA025870.1 Exp number of AAs in TMHs: 0.19882  
 # TEA025870.1 Exp number, first 60 AAs: 0.00141  
 # TEA025870.1 Total prob of N-in: 0.00426  
 TEA025870.1 TMHMM2.0 outside 1 776

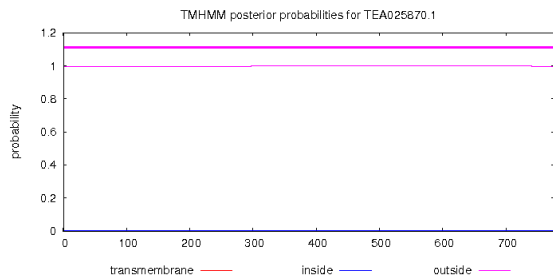

# **TEA016319.1** Length: 627  
 # TEA016319.1 Number of predicted TMHs: 0  
 # TEA016319.1 Exp number of AAs in TMHs: 0.11408  
 # TEA016319.1 Exp number, first 60 AAs: 3e-05  
 # TEA016319.1 Total prob of N-in: 0.00653  
 TEA016319.1 TMHMM2.0 outside 1 627

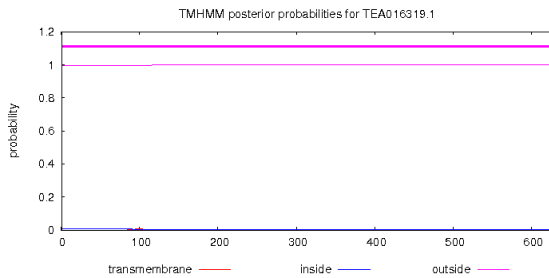

# **TEA029598.1** Length: 423  
 # TEA029598.1 Number of predicted TMHs: 0  
 # TEA029598.1 Exp number of AAs in TMHs: 0.02545  
 # TEA029598.1 Exp number, first 60 AAs: 0.00568  
 # TEA029598.1 Total prob of N-in: 0.01343  
 TEA029598.1 TMHMM2.0 outside 1 423

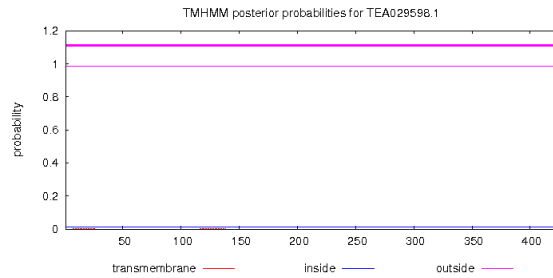

# **TEA008165.1** Length: 1032  
 # TEA008165.1 Number of predicted TMHs: 0  
 # TEA008165.1 Exp number of AAs in TMHs: 6.76661  
 # TEA008165.1 Exp number, first 60 AAs: 3.17779  
 # TEA008165.1 Total prob of N-in: 0.04338  
 TEA008165.1 TMHMM2.0 outside 1 1032

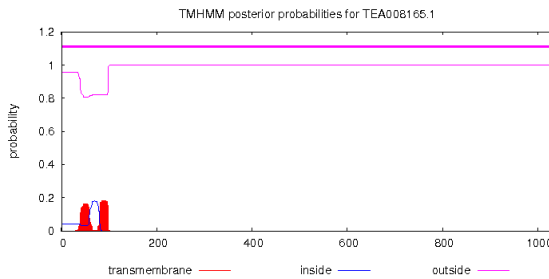

# **TEA027265.1** Length: 939  
 # TEA027265.1 Number of predicted TMHs: 0  
 # TEA027265.1 Exp number of AAs in TMHs: 0  
 # TEA027265.1 Exp number, first 60 AAs: 0  
 # TEA027265.1 Total prob of N-in: 0.00001  
 TEA027265.1 TMHMM2.0 outside 1 939

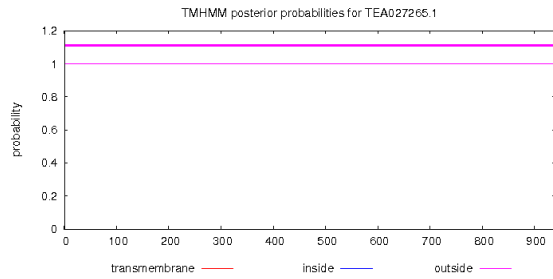

# **TEA006319.1** Length: 683  
 # TEA006319.1 Number of predicted TMHs: 0  
 # TEA006319.1 Exp number of AAs in TMHs: 0.00042  
 # TEA006319.1 Exp number, first 60 AAs: 0  
 # TEA006319.1 Total prob of N-in: 0.00017  
 TEA006319.1 TMHMM2.0 outside 1 683

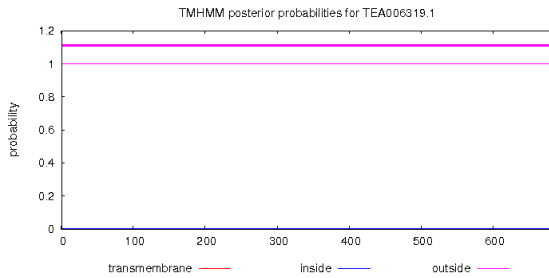

# **TEA006473.1** Length: 710  
 # TEA006473.1 Number of predicted TMHs: 0  
 # TEA006473.1 Exp number of AAs in TMHs: 0.00515  
 # TEA006473.1 Exp number, first 60 AAs: 0  
 # TEA006473.1 Total prob of N-in: 0.00031  
 TEA006473.1 TMHMM2.0 outside 1 710

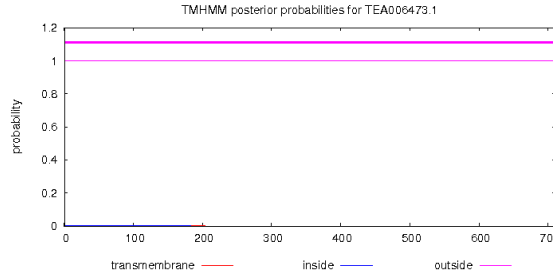

‡ **TEA014429.1** Length: 1191  
 # TEA014429.1 Number of predicted TMHs: 0  
 # TEA014429.1 Exp number of AAs in TMHs: 0.02164  
 # TEA014429.1 Exp number, first 60 AAs: 0.00074  
 # TEA014429.1 Total prob of N-in: 0.00023  
 TEA014429.1 TMHMM2.0 outside 1 1191

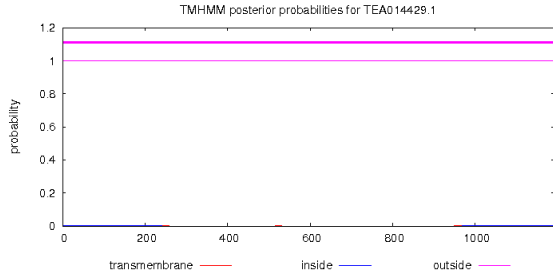

‡ **TEA031711.1** Length: 562  
 # TEA031711.1 Number of predicted TMHs: 0  
 # TEA031711.1 Exp number of AAs in TMHs: 0.0069899  
 # TEA031711.1 Exp number, first 60 AAs: 0.00016  
 # TEA031711.1 Total prob of N-in: 0.00833  
 TEA031711.1 TMHMM2.0 outside 1 562

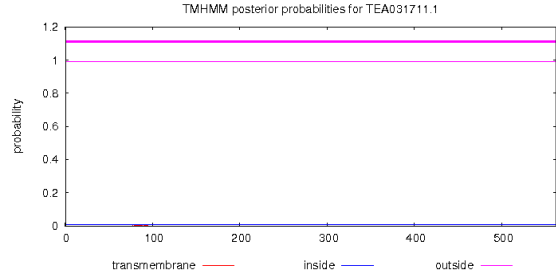

† **TEA001470.1** Length: 789  
 # TEA001470.1 Number of predicted TMHs: 0  
 # TEA001470.1 Exp number of AAs in TMHs: 3.06197  
 # TEA001470.1 Exp number, first 60 AAs: 0.21965  
 # TEA001470.1 Total prob of N-in: 0.01032  
 TEA001470.1 TMHMM2.0 outside 1 789

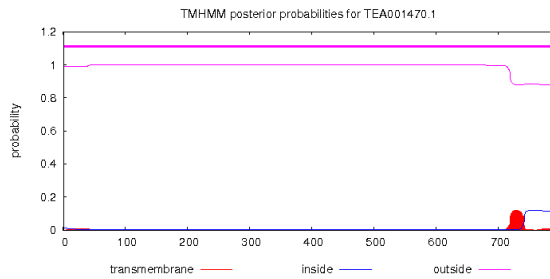

† **TEA017119.1** Length: 506  
 # TEA017119.1 Number of predicted TMHs: 0  
 # TEA017119.1 Exp number of AAs in TMHs: 0.04644  
 # TEA017119.1 Exp number, first 60 AAs: 0.00226  
 # TEA017119.1 Total prob of N-in: 0.01372  
 TEA017119.1 TMHMM2.0 outside 1 506

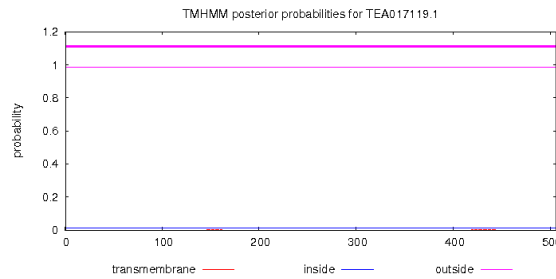

† **TEA005306.1** Length: 1097  
 # TEA005306.1 Number of predicted TMHs: 0  
 # TEA005306.1 Exp number of AAs in TMHs: 0.03434  
 # TEA005306.1 Exp number, first 60 AAs: 0  
 # TEA005306.1 Total prob of N-in: 0.00020  
 TEA005306.1 TMHMM2.0 outside 1 1097

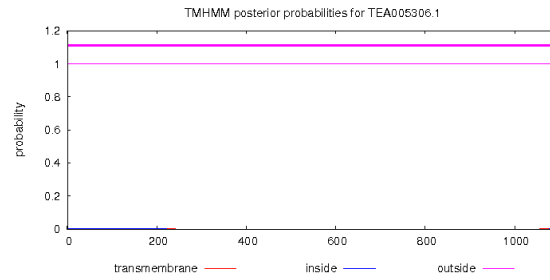

† **TEA009902.1** Length: 450  
 # TEA009902.1 Number of predicted TMHs: 0  
 # TEA009902.1 Exp number of AAs in TMHs: 0.71758  
 # TEA009902.1 Exp number, first 60 AAs: 0.10658  
 # TEA009902.1 Total prob of N-in: 0.00748  
 TEA009902.1 TMHMM2.0 outside 1 450

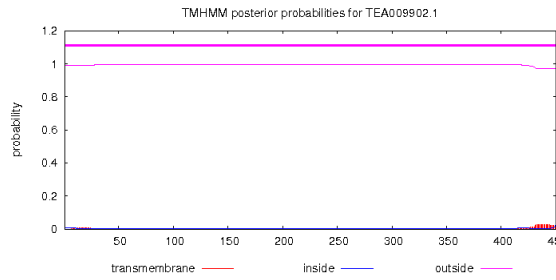

† **TEA005122.1** Length: 334  
 # TEA005122.1 Number of predicted TMHs: 0  
 # TEA005122.1 Exp number of AAs in TMHs: 0.01241  
 # TEA005122.1 Exp number, first 60 AAs: 0.00929  
 # TEA005122.1 Total prob of N-in: 0.04268  
 TEA005122.1 TMHMM2.0 outside 1 334

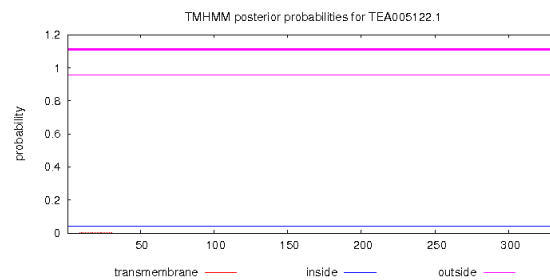

† **TEA028214.1** Length: 344  
 # TEA028214.1 Number of predicted TMHs: 0  
 # TEA028214.1 Exp number of AAs in TMHs: 0.00766  
 # TEA028214.1 Exp number, first 60 AAs: 0.00225  
 # TEA028214.1 Total prob of N-in: 0.02030  
 TEA028214.1 TMHMM2.0 outside 1 344

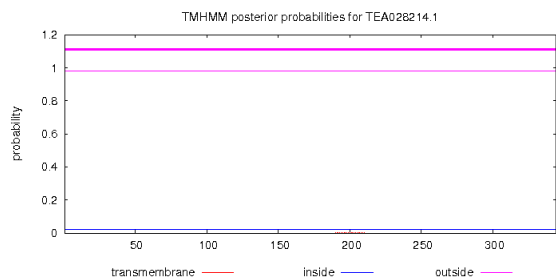

```

# TEA031689.1 Length: 311
# TEA031689.1 Number of predicted TMHs: 0
# TEA031689.1 Exp number of AAs in TMHs: 0.28379
# TEA031689.1 Exp number, first 60 AAs: 0.25957
# TEA031689.1 Total prob of N-in: 0.04973
TEA031689.1 TMHMM2.0 outside 1 311

```

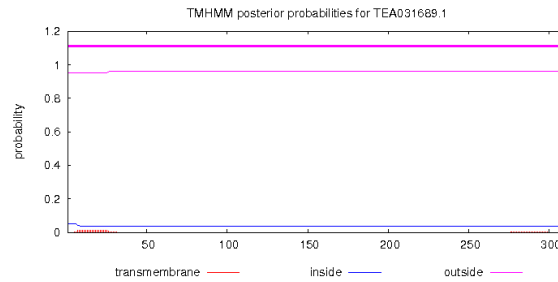

**S1 Fig. Transmembrane helices of MAPKKKs of MEKK subfamily in *C. sinensis*.** TMHMM Server, v.2.0 (<http://www.cbs.dtu.dk/services/TMHMM/>), was used to predict the presence of transmembrane helices. The plot shows the posterior probabilities of inside/outside/TM helix. The plot is obtained by calculating the total probability that a residue sits in helix, inside, or outside summed over all possible paths through the model. The red peaks represent the possible transmembrane helices present. If the red peak crosses the transmembrane line (represented in pink colour), then its calculated as 1 transmembrane helix.



# **TEA001765.1** Length: 842  
 # TEA001765.1 Number of predicted TMHs: 0  
 # TEA001765.1 Exp number of AAs in TMHs: 1.26294  
 # TEA001765.1 Exp number, first 60 AAs: 0  
 # TEA001765.1 Total prob of N-in: 0.00418  
 TEA001765.1 TMHMM2.0 outside 1 842

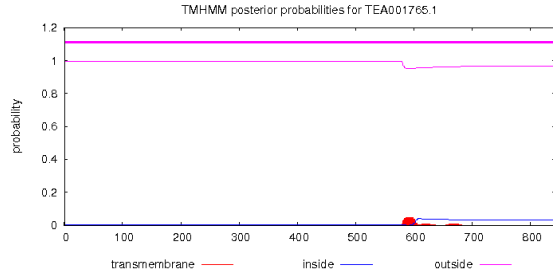

# **TEA002020.1** Length: 896  
 # TEA002020.1 Number of predicted TMHs: 0  
 # TEA002020.1 Exp number of AAs in TMHs: 0.01584  
 # TEA002020.1 Exp number, first 60 AAs: 0  
 # TEA002020.1 Total prob of N-in: 0.00015  
 TEA002020.1 TMHMM2.0 outside 1 896

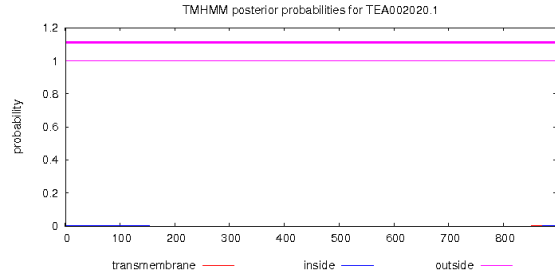

# **TEA000256.1** Length: 1086  
 # TEA000256.1 Number of predicted TMHs: 0  
 # TEA000256.1 Exp number of AAs in TMHs: 0.00826  
 # TEA000256.1 Exp number, first 60 AAs: 0  
 # TEA000256.1 Total prob of N-in: 0.00004  
 TEA000256.1 TMHMM2.0 outside 1 1086

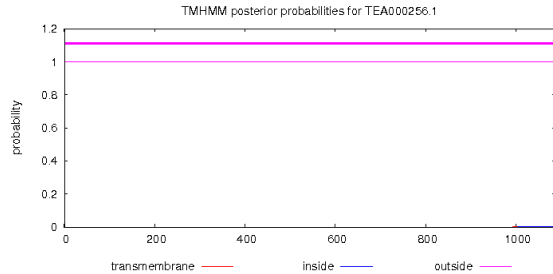

# **TEA029086.1** Length: 919  
 # TEA029086.1 Number of predicted TMHs: 0  
 # TEA029086.1 Exp number of AAs in TMHs: 0.27701  
 # TEA029086.1 Exp number, first 60 AAs: 0  
 # TEA029086.1 Total prob of N-in: 0.00050  
 TEA029086.1 TMHMM2.0 outside 1 919

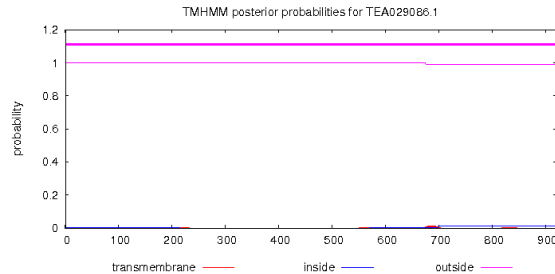

# **TEA022129.1** Length: 940  
 # TEA022129.1 Number of predicted TMHs: 0  
 # TEA022129.1 Exp number of AAs in TMHs: 37.32592  
 # TEA022129.1 Exp number, first 60 AAs: 0  
 # TEA022129.1 Total prob of N-in: 0.17108  
 TEA022129.1 TMHMM2.0 outside 1 940

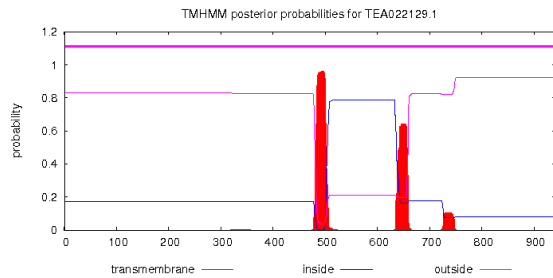

# **TEA019143.1** Length: 724  
 # TEA019143.1 Number of predicted TMHs: 0  
 # TEA019143.1 Exp number of AAs in TMHs: 0.01226  
 # TEA019143.1 Exp number, first 60 AAs: 0  
 # TEA019143.1 Total prob of N-in: 0.00005  
 TEA019143.1 TMHMM2.0 outside 1 724

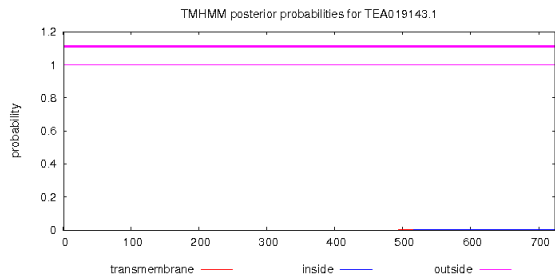

‡ **TEA028452.1** Length: 846  
 # TEA028452.1 Number of predicted TMHs: 0  
 # TEA028452.1 Exp number of AAs in TMHs: 0.05099  
 # TEA028452.1 Exp number, first 60 AAs: 0  
 # TEA028452.1 Total prob of N-in: 0.00001  
 TEA028452.1 TMHMM2.0 outside 1 846

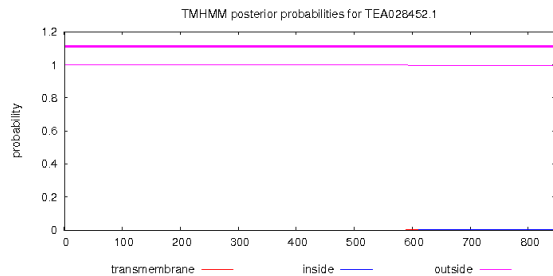

‡ **TEA016969.1** Length: 1107  
 # TEA016969.1 Number of predicted TMHs: 0  
 # TEA016969.1 Exp number of AAs in TMHs: 6.33735  
 # TEA016969.1 Exp number, first 60 AAs: 0  
 # TEA016969.1 Total prob of N-in: 0.27806  
 TEA016969.1 TMHMM2.0 outside 1 1107

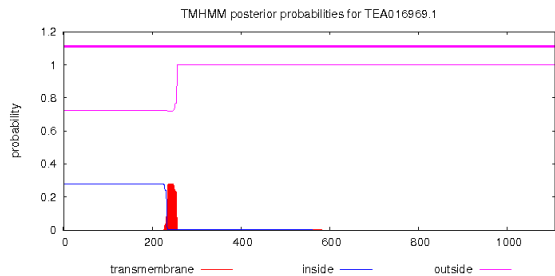

# **TEA013270.1** Length: 755  
 # TEA013270.1 Number of predicted TMHs: 0  
 # TEA013270.1 Exp number of AAs in TMHs: 0.10844  
 # TEA013270.1 Exp number, first 60 AAs: 0  
 # TEA013270.1 Total prob of N-in: 0.00501  
 TEA013270.1 TMHMM2.0 outside 1 755

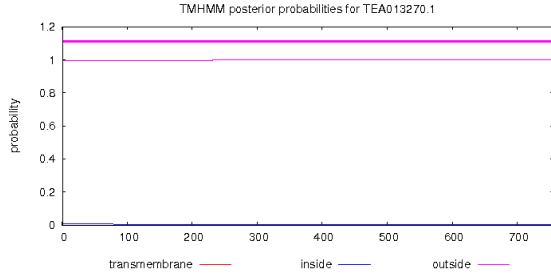

# **TEA026716.1** Length: 368  
 # TEA026716.1 Number of predicted TMHs: 0  
 # TEA026716.1 Exp number of AAs in TMHs: 0.00933  
 # TEA026716.1 Exp number, first 60 AAs: 0.00015  
 # TEA026716.1 Total prob of N-in: 0.02057  
 TEA026716.1 TMHMM2.0 outside 1 368

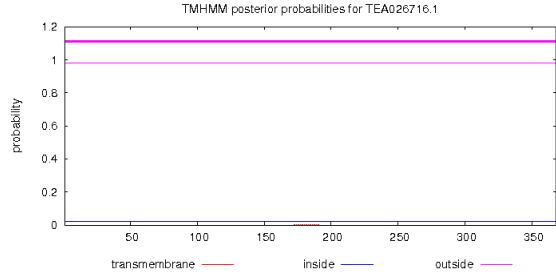

# **TEA028758.1** Length: 1213  
 # TEA028758.1 Number of predicted TMHs: 0  
 # TEA028758.1 Exp number of AAs in TMHs: 0.0185  
 # TEA028758.1 Exp number, first 60 AAs: 0.00018  
 # TEA028758.1 Total prob of N-in: 0.00001  
 TEA028758.1 TMHMM2.0 outside 1 1213

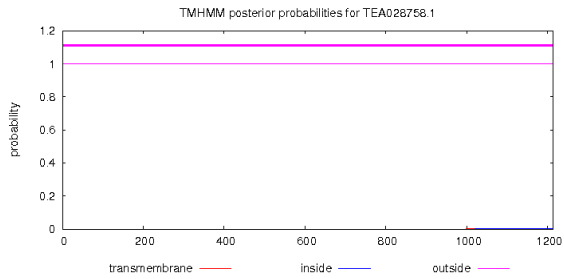

# **TEA010804.1** Length: 305  
 # TEA010804.1 Number of predicted TMHs: 0  
 # TEA010804.1 Exp number of AAs in TMHs: 0.00132  
 # TEA010804.1 Exp number, first 60 AAs: 0  
 # TEA010804.1 Total prob of N-in: 0.01241  
 TEA010804.1 TMHMM2.0 outside 1 305

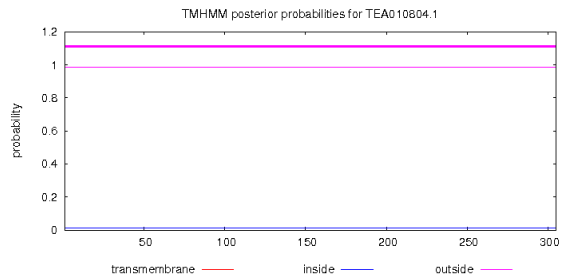

† **TEA009451.1** Length: 1333  
 # TEA009451.1 Number of predicted TMHs: 0  
 # TEA009451.1 Exp number of AAs in TMHs: 0.02716  
 # TEA009451.1 Exp number, first 60 AAs: 0.02022  
 # TEA009451.1 Total prob of N-in: 0.00132  
 TEA009451.1 TMHMM2.0 outside 1 1333

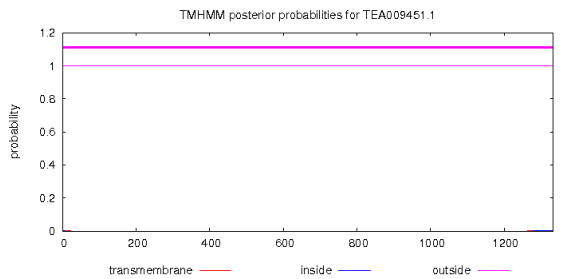

† **TEA021421.1** Length: 1331  
 # TEA021421.1 Number of predicted TMHs: 0  
 # TEA021421.1 Exp number of AAs in TMHs: 0.01119  
 # TEA021421.1 Exp number, first 60 AAs: 0  
 # TEA021421.1 Total prob of N-in: 0.00001  
 TEA021421.1 TMHMM2.0 outside 1 1331

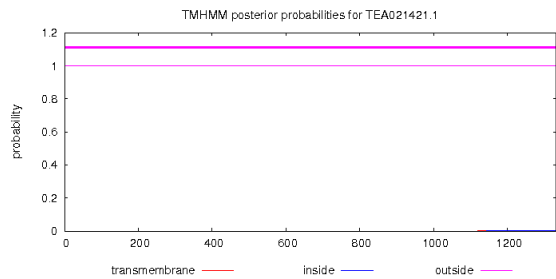

# **TEA017670.1** Length: 561  
 # TEA017670.1 Number of predicted TMHs: 0  
 # TEA017670.1 Exp number of AAs in TMHs: 0.03517  
 # TEA017670.1 Exp number, first 60 AAs: 0  
 # TEA017670.1 Total prob of N-in: 0.00270  
 TEA017670.1 TMHMM2.0 outside 1 561

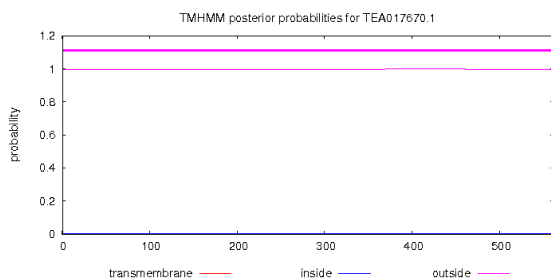

# **TEA019184.1** Length: 601  
 # TEA019184.1 Number of predicted TMHs: 0  
 # TEA019184.1 Exp number of AAs in TMHs: 0.01866  
 # TEA019184.1 Exp number, first 60 AAs: 0  
 # TEA019184.1 Total prob of N-in: 0.00147  
 TEA019184.1 TMHMM2.0 outside 1 601

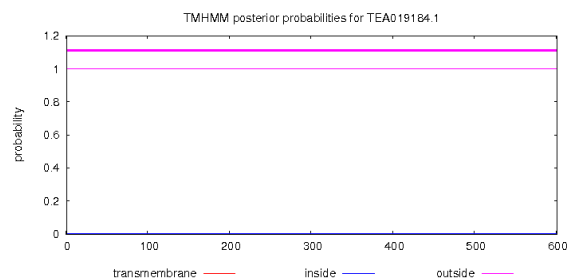

# **TEA000933.1** Length: 407  
 # TEA000933.1 Number of predicted TMHs: 0  
 # TEA000933.1 Exp number of AAs in TMHs: 0.46154  
 # TEA000933.1 Exp number, first 60 AAs: 0  
 # TEA000933.1 Total prob of N-in: 0.00794  
 TEA000933.1 TMHMM2.0 outside 1 407

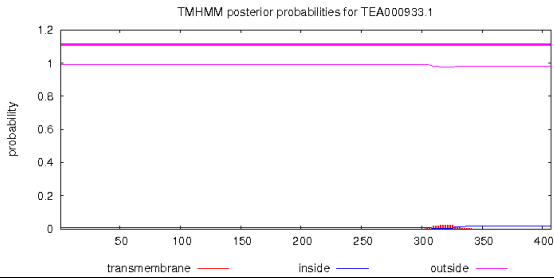

# **TEA031230.1** Length: 489  
 # TEA031230.1 Number of predicted TMHs: 0  
 # TEA031230.1 Exp number of AAs in TMHs: 0.13166  
 # TEA031230.1 Exp number, first 60 AAs: 0.00013  
 # TEA031230.1 Total prob of N-in: 0.00470  
 TEA031230.1 TMHMM2.0 outside 1 489

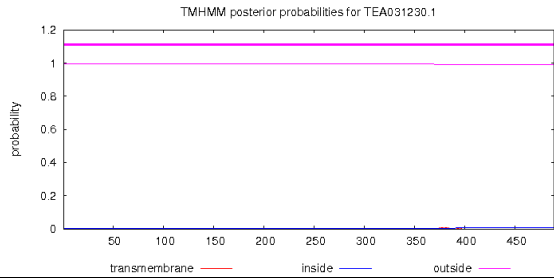

† **TEA022171.1** Length: 404  
 # TEA022171.1 Number of predicted TMHs: 0  
 # TEA022171.1 Exp number of AAs in TMHs: 0.01418  
 # TEA022171.1 Exp number, first 60 AAs: 0  
 # TEA022171.1 Total prob of N-in: 0.01930  
 TEA022171.1 TMHMM2.0 outside 1 404

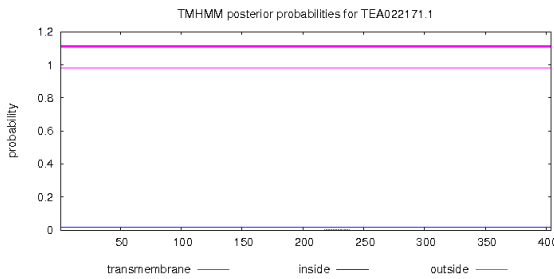

† **TEA011280.1** Length: 368  
 # TEA011280.1 Number of predicted TMHs: 0  
 # TEA011280.1 Exp number of AAs in TMHs: 0.0076  
 # TEA011280.1 Exp number, first 60 AAs: 0  
 # TEA011280.1 Total prob of N-in: 0.00291  
 TEA011280.1 TMHMM2.0 outside 1 368

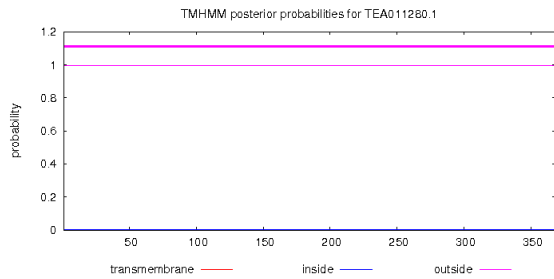

# **TEA031223.1** Length: 434  
 # TEA031223.1 Number of predicted TMHs: 0  
 # TEA031223.1 Exp number of AAs in TMHs: 0.27035  
 # TEA031223.1 Exp number, first 60 AAs: 0  
 # TEA031223.1 Total prob of N-in: 0.01318  
 TEA031223.1 TMHMM2.0 outside 1 434

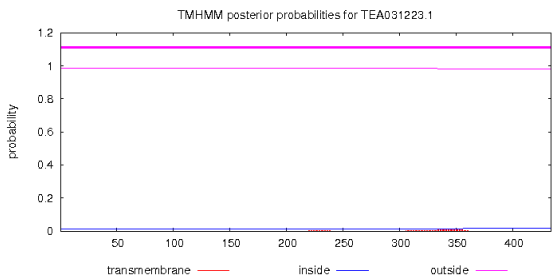

# **TEA007232.1** Length: 368  
 # TEA007232.1 Number of predicted TMHs: 0  
 # TEA007232.1 Exp number of AAs in TMHs: 0.04776  
 # TEA007232.1 Exp number, first 60 AAs: 0  
 # TEA007232.1 Total prob of N-in: 0.01435  
 TEA007232.1 TMHMM2.0 outside 1 368

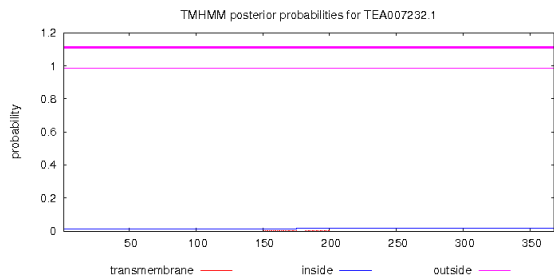

† **TEA016553.1** Length: 432  
 # TEA016553.1 Number of predicted TMHs: 0  
 # TEA016553.1 Exp number of AAs in TMHs: 0.01056  
 # TEA016553.1 Exp number, first 60 AAs: 0  
 # TEA016553.1 Total prob of N-in: 0.00632  
 TEA016553.1 TMHMM2.0 outside 1 432

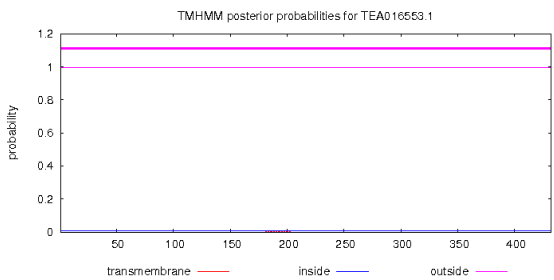

† **TEA033032.1** Length: 415  
 # TEA033032.1 Number of predicted TMHs: 0  
 # TEA033032.1 Exp number of AAs in TMHs: 0.16877  
 # TEA033032.1 Exp number, first 60 AAs: 8e-05  
 # TEA033032.1 Total prob of N-in: 0.00767  
 TEA033032.1 TMHMM2.0 outside 1 415

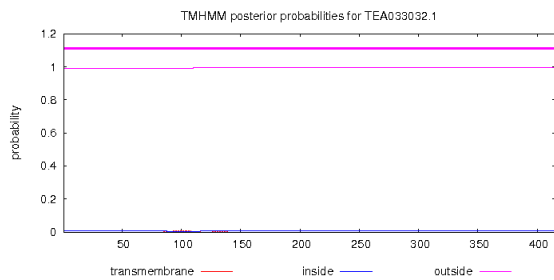



† **TEA001764.1** Length: 351  
 # TEA001764.1 Number of predicted TMHs: 0  
 # TEA001764.1 Exp number of AAs in TMHs: 0.22163  
 # TEA001764.1 Exp number, first 60 AAs: 0.00043  
 # TEA001764.1 Total prob of N-in: 0.01088  
 TEA001764.1 TMHMM2.0 outside 1 351

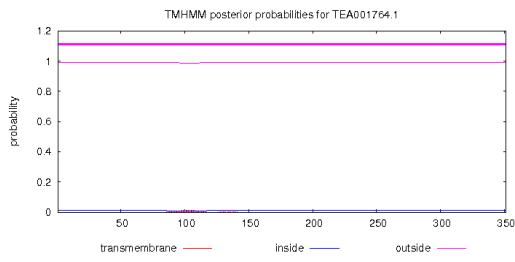

† **TEA026000.1** Length: 1296  
 # TEA026000.1 Number of predicted TMHs: 0  
 # TEA026000.1 Exp number of AAs in TMHs: 0.3705  
 # TEA026000.1 Exp number, first 60 AAs: 0  
 # TEA026000.1 Total prob of N-in: 0.00000  
 TEA026000.1 TMHMM2.0 outside 1 1296

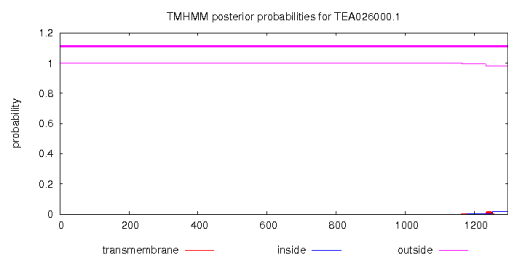

# **TEA033556.1** Length: 541  
 # TEA033556.1 Number of predicted TMHs: 0  
 # TEA033556.1 Exp number of AAs in TMHs: 4.33922  
 # TEA033556.1 Exp number, first 60 AAs: 0.00021  
 # TEA033556.1 Total prob of N-in: 0.06460  
 TEA033556.1 TMHMM2.0 outside 1 541

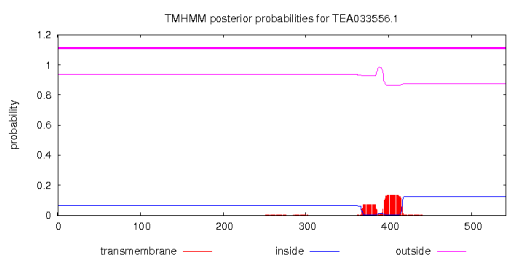

# **TEA013875.1** Length: 341  
 # TEA013875.1 Number of predicted TMHs: 0  
 # TEA013875.1 Exp number of AAs in TMHs: 1.96914  
 # TEA013875.1 Exp number, first 60 AAs: 0.00196  
 # TEA013875.1 Total prob of N-in: 0.13897  
 TEA013875.1 TMHMM2.0 outside 1 341

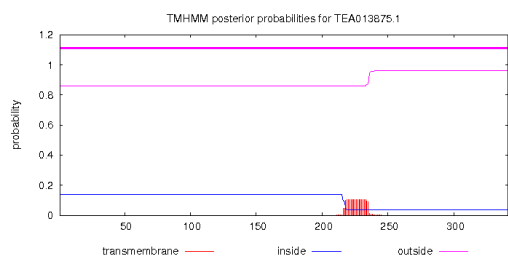

† **TEA002722.1** Length: 1436  
 # TEA002722.1 Number of predicted TMHs: 0  
 # TEA002722.1 Exp number of AAs in TMHs: 0.01114  
 # TEA002722.1 Exp number, first 60 AAs: 6e-05  
 # TEA002722.1 Total prob of N-in: 0.00001  
 TEA002722.1 TMHMM2.0 outside 1 1436

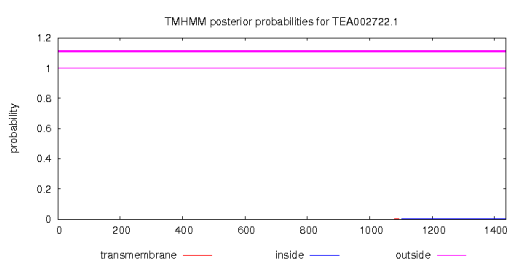

† **TEA030052.1** Length: 1357  
 # TEA030052.1 Number of predicted TMHs: 0  
 # TEA030052.1 Exp number of AAs in TMHs: 0.02427  
 # TEA030052.1 Exp number, first 60 AAs: 0.00401  
 # TEA030052.1 Total prob of N-in: 0.00064  
 TEA030052.1 TMHMM2.0 outside 1 1357

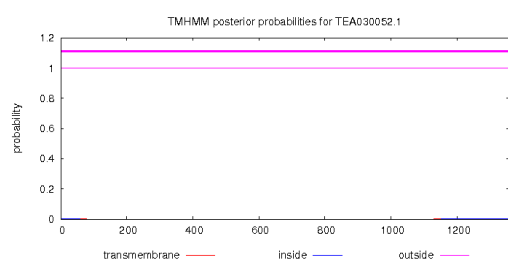

# **TEA008343.1** Length: 334  
 # TEA008343.1 Number of predicted TMHs: 0  
 # TEA008343.1 Exp number of AAs in TMHs: 0.097979999  
 # TEA008343.1 Exp number, first 60 AAs: 0  
 # TEA008343.1 Total prob of N-in: 0.02590  
 TEA008343.1 TMHMM2.0 outside 1 334

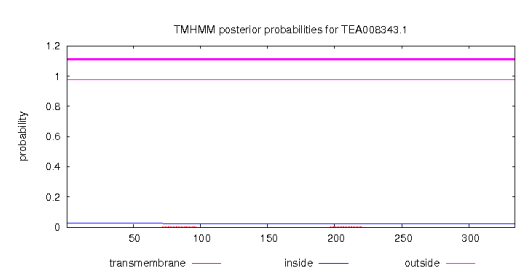

**S2 Fig. Transmembrane helices of MAPKKKs of Raf subfamily in *C. sinensis*.** TMHMM Server, v.2.0 (<http://www.cbs.dtu.dk/services/TMHMM/>), was used to predict the presence of transmembrane helices. The plot shows the posterior probabilities of inside/outside/TM helix. The plot is obtained by calculating the total probability that a residue sits in helix, inside, or outside summed over all possible paths through the model. The red peaks represent the possible transmembrane helices present. If the red peak crosses the transmembrane line (represented in pink colour), then its calculated as 1 transmembrane helix.

† **TEA010125.1** Length: 675  
 # TEA010125.1 Number of predicted TMHs: 0  
 # TEA010125.1 Exp number of AAs in TMHs: 0.00052  
 # TEA010125.1 Exp number, first 60 AAs: 0  
 # TEA010125.1 Total prob of N-in: 0.00014  
 TEA010125.1 TMHMM2.0 outside 1 675

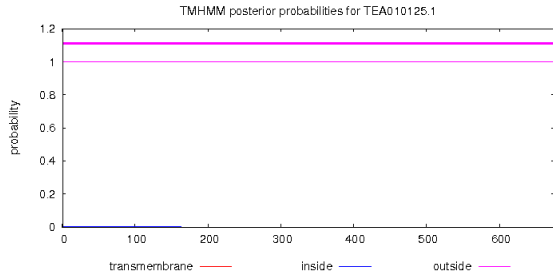

# **TEA022762.1** Length: 732  
 # TEA022762.1 Number of predicted TMHs: 0  
 # TEA022762.1 Exp number of AAs in TMHs: 0.01389  
 # TEA022762.1 Exp number, first 60 AAs: 0.01054  
 # TEA022762.1 Total prob of N-in: 0.00094  
 TEA022762.1 TMHMM2.0 outside 1 732

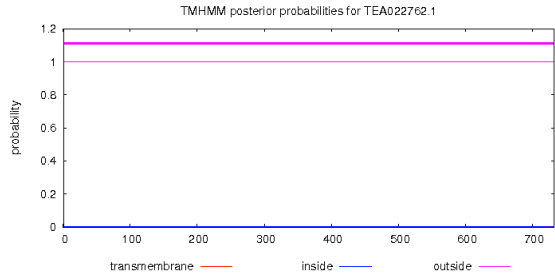

# **TEA024720.1** Length: 655  
 # TEA024720.1 Number of predicted TMHs: 0  
 # TEA024720.1 Exp number of AAs in TMHs: 0.20568  
 # TEA024720.1 Exp number, first 60 AAs: 0.00353  
 # TEA024720.1 Total prob of N-in: 0.01086  
 TEA024720.1 TMHMM2.0 outside 1 655

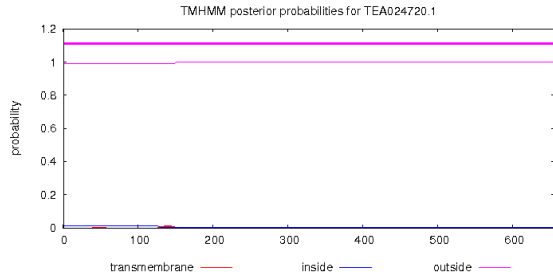

# **TEA002087.1** Length: 719  
 # TEA002087.1 Number of predicted TMHs: 0  
 # TEA002087.1 Exp number of AAs in TMHs: 0.00067  
 # TEA002087.1 Exp number, first 60 AAs: 0  
 # TEA002087.1 Total prob of N-in: 0.00011  
 TEA002087.1 TMHMM2.0 outside 1 719

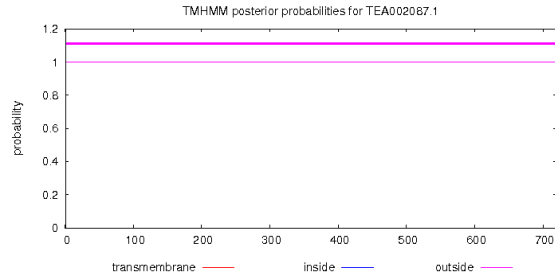

† **TEA013346.1** Length: 831  
 # TEA013346.1 Number of predicted TMHs: 0  
 # TEA013346.1 Exp number of AAs in TMHs: 0.00018  
 # TEA013346.1 Exp number, first 60 AAs: 0  
 # TEA013346.1 Total prob of N-in: 0.00002  
 TEA013346.1 TMHMM2.0 outside 1 831

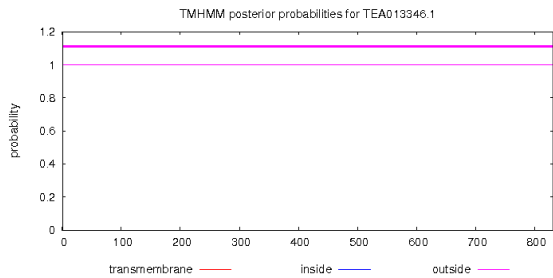

† **TEA013344.1** Length: 481  
 # TEA013344.1 Number of predicted TMHs: 0  
 # TEA013344.1 Exp number of AAs in TMHs: 0.00164  
 # TEA013344.1 Exp number, first 60 AAs: 0  
 # TEA013344.1 Total prob of N-in: 0.00069  
 TEA013344.1 TMHMM2.0 outside 1 481

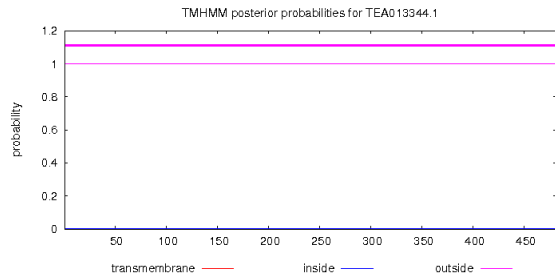

# **TEA031068.1** Length: 762  
 # TEA031068.1 Number of predicted TMHs: 0  
 # TEA031068.1 Exp number of AAs in TMHs: 3.06785  
 # TEA031068.1 Exp number, first 60 AAs: 1.30494  
 # TEA031068.1 Total prob of N-in: 0.06089  
 TEA031068.1 TMHMM2.0 outside 1 762

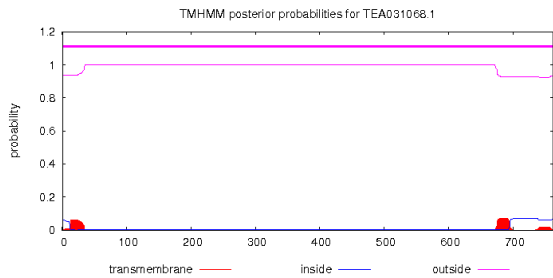

# **TEA020698.1** Length: 664  
 # TEA020698.1 Number of predicted TMHs: 0  
 # TEA020698.1 Exp number of AAs in TMHs: 1.53983  
 # TEA020698.1 Exp number, first 60 AAs: 0.00118  
 # TEA020698.1 Total prob of N-in: 0.00060  
 TEA020698.1 TMHMM2.0 outside 1 664

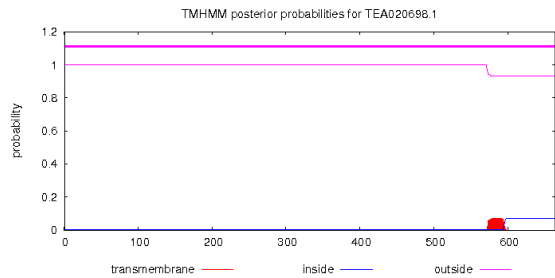

```

# TEA027328.1 Length: 748
# TEA027328.1 Number of predicted TMHs: 1
# TEA027328.1 Exp number of AAs in TMHs: 30.33445
# TEA027328.1 Exp number, first 60 AAs: 29.76268
# TEA027328.1 Total prob of N-in: 0.47196
# TEA027328.1 POSSIBLE N-term signal sequence
TEA027328.1 TMHMM2.0 inside 1 39
TEA027328.1 TMHMM2.0 TMhelix 40 58
TEA027328.1 TMHMM2.0 outside 59 748

```

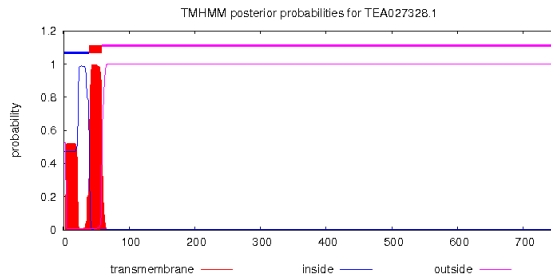

```

# TEA020112.1 Length: 300
# TEA020112.1 Number of predicted TMHs: 0
# TEA020112.1 Exp number of AAs in TMHs: 0.00508
# TEA020112.1 Exp number, first 60 AAs: 0
# TEA020112.1 Total prob of N-in: 0.01462
TEA020112.1 TMHMM2.0 outside 1 300

```

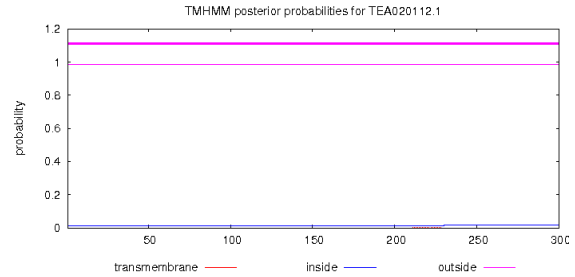

```

# TEA033250.1 Length: 622
# TEA033250.1 Number of predicted TMHs: 0
# TEA033250.1 Exp number of AAs in TMHs: 0.00119
# TEA033250.1 Exp number, first 60 AAs: 0
# TEA033250.1 Total prob of N-in: 0.00024
TEA033250.1 TMHMM2.0 outside 1 622

```

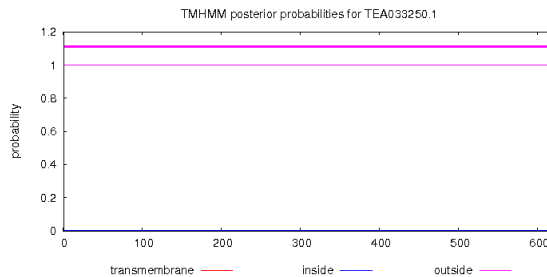

**S3 Fig. Transmembrane helices of MAPKKs of ZIK subfamily in *C. sinensis*.** TMHMM Server, v.2.0 (<http://www.cbs.dtu.dk/services/TMHMM/>), was used to predict the presence of transmembrane helices. The plot shows the posterior probabilities of inside/outside/TM helix. The plot is obtained by calculating the total probability that a residue sits in helix, inside, or outside summed over all possible paths through the model. The red peaks represent the possible transmembrane helices present. If the red peak crosses the transmembrane line (represented in pink colour), then its calculated as 1 transmembrane helix.

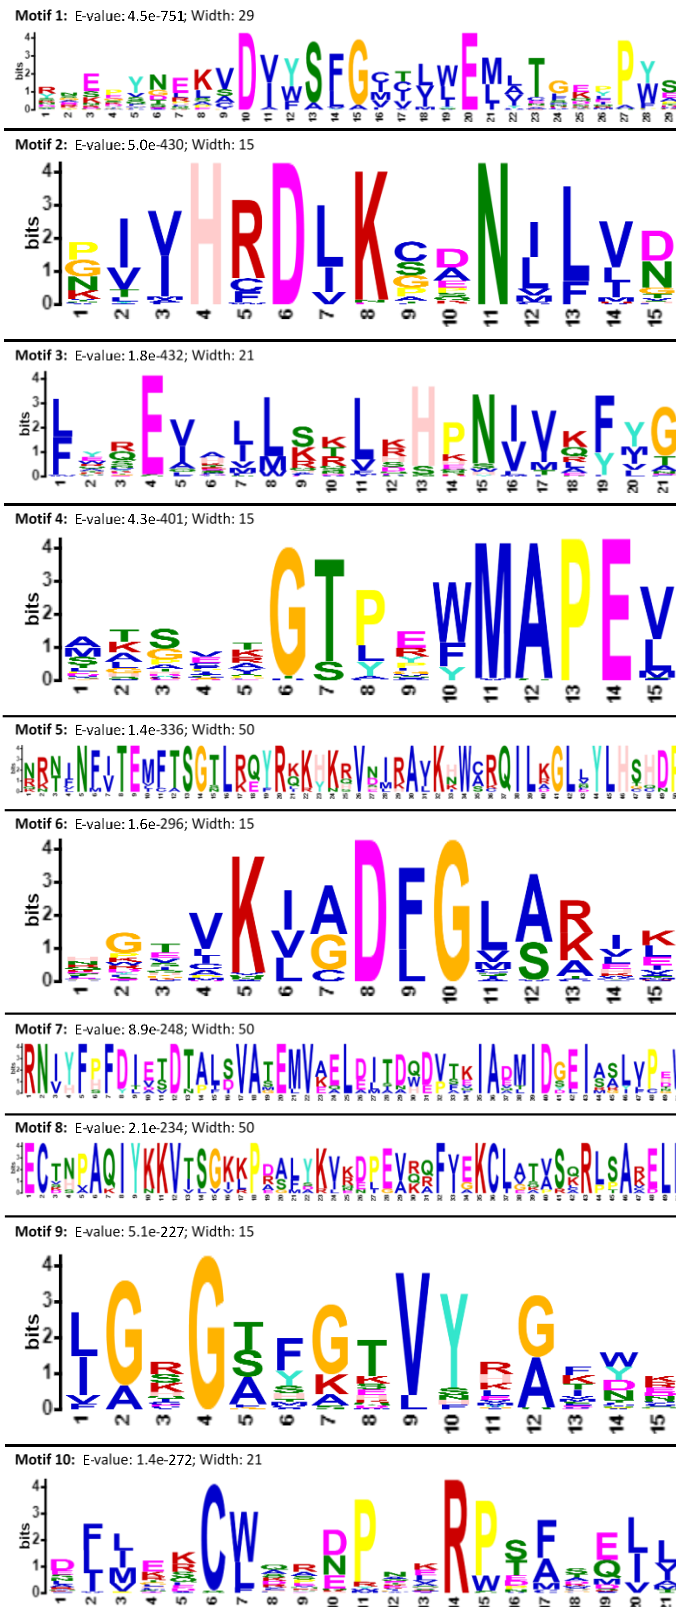

**S4 Fig. Motif logos of the 10 identified motifs in 59 MAPKKKs of *C. sinensis*. The motif logos were generated by MEME suite.**

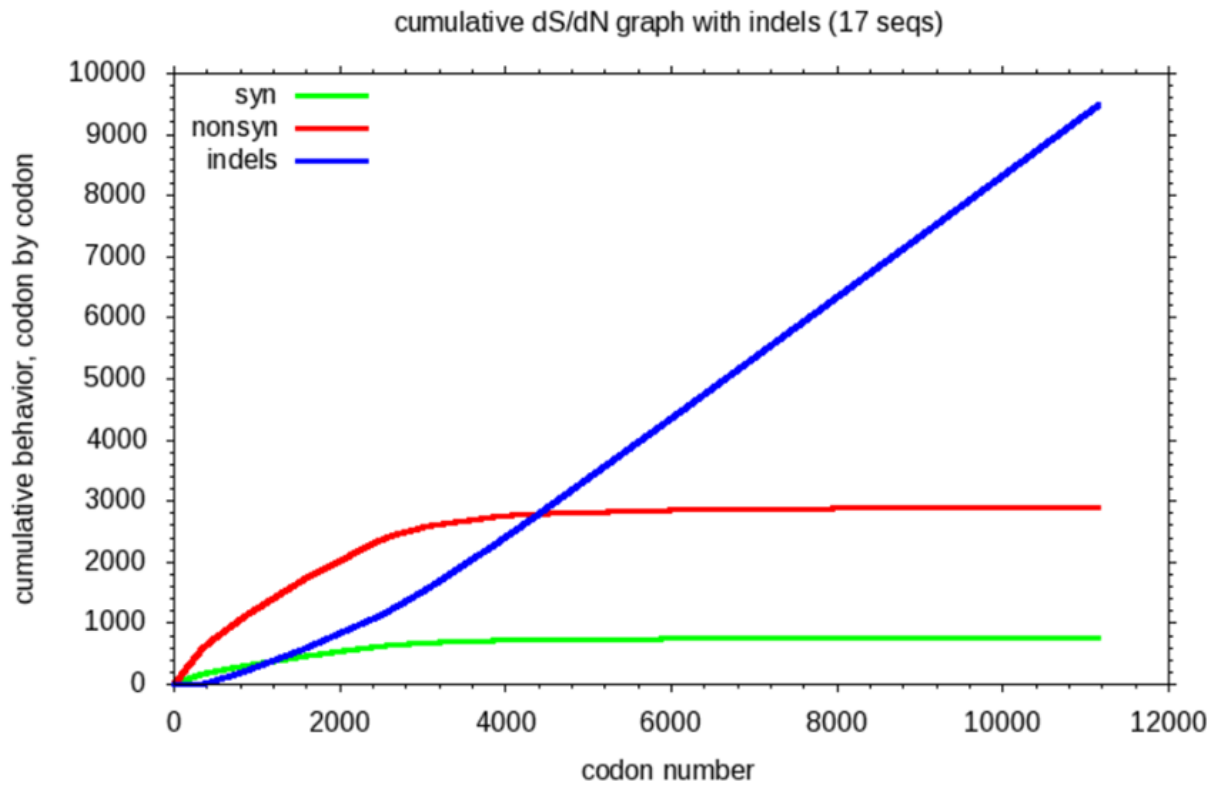

**S5 Fig.** The ds/dn cumulative graph of MAPKKKs of MEKK subfamily in *C. sinensis*. SNAP server (<https://www.hiv.lanl.gov/content/sequence/SNAP/SNAP.html>) has been used to generate the graph.

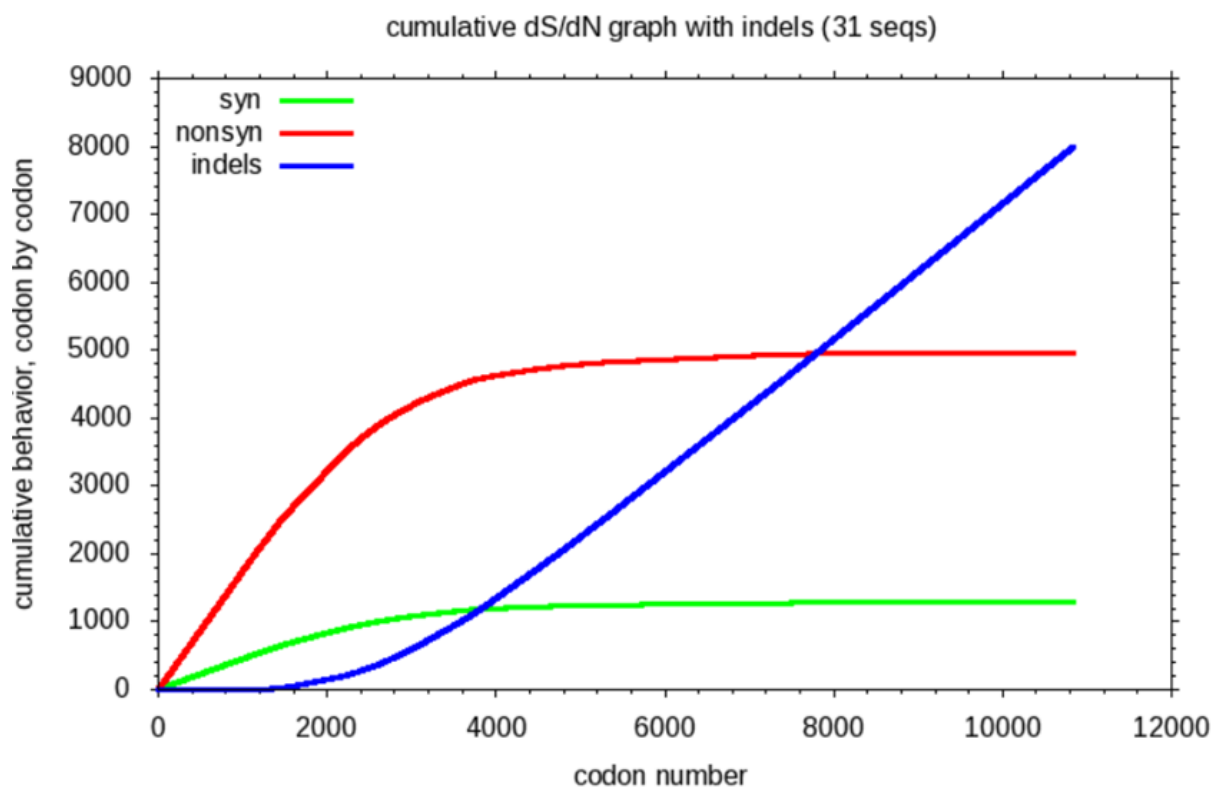

**S6 Fig. The ds/dn cumulative graph of MAPKKKs of Raf subfamily in *C. sinensis*.** SNAP server (<https://www.hiv.lanl.gov/content/sequence/SNAP/SNAP.html>) has been used to generate the graph.

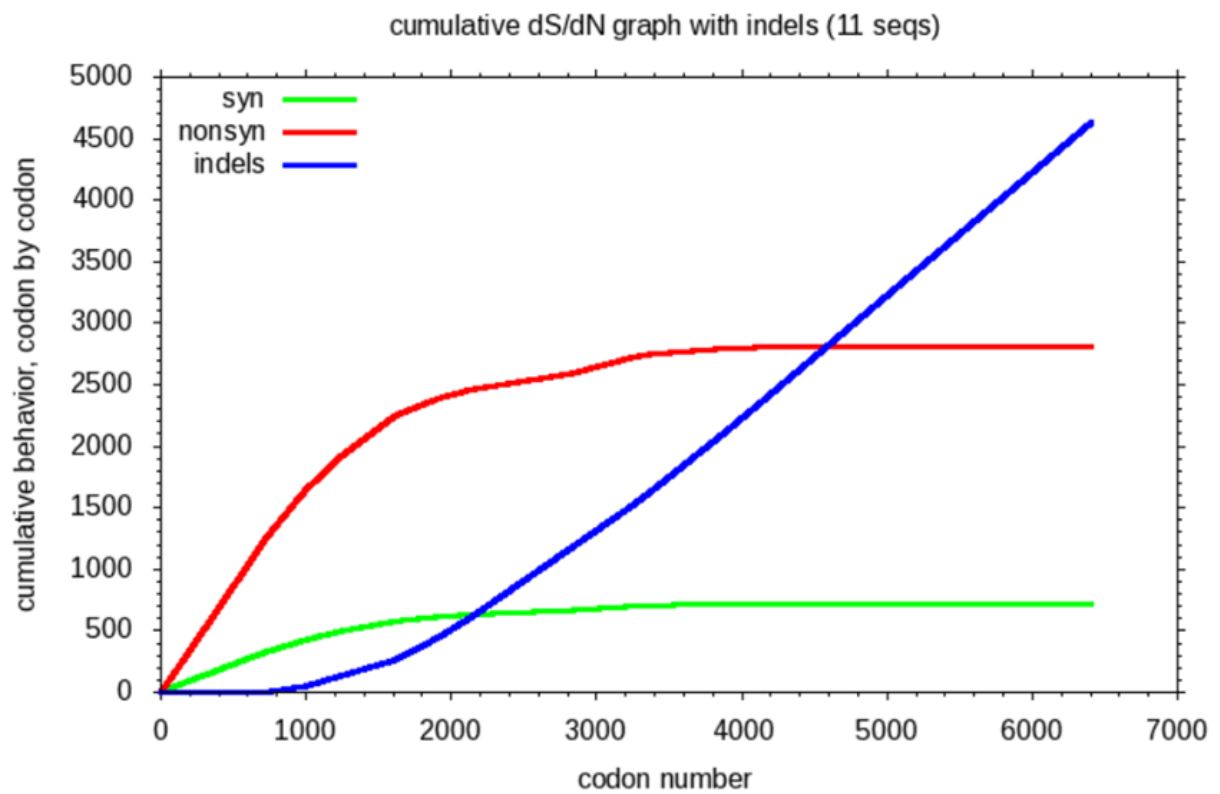

**S7 Fig.** The ds/dn cumulative graph of MAPKKKs of ZIK subfamily in *C. sinensis*. SNAP server (<https://www.hiv.lanl.gov/content/sequence/SNAP/SNAP.html>) has been used to generate the graph.



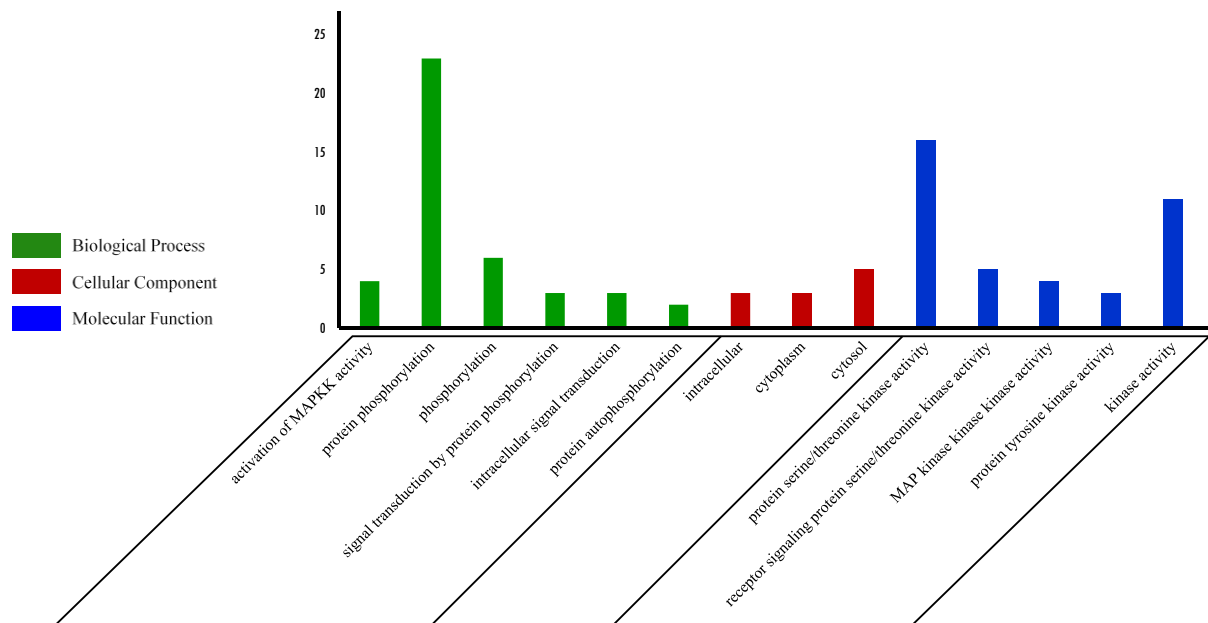

**S8 Fig. GO analysis of all the 59 MAPKKs in *C. sinensis*.** The results have been grouped into three main categories: Biological Process, Cellular Component and Molecular function. The y-axis represents the frequency of genes while the x-axis represents the putative functions.

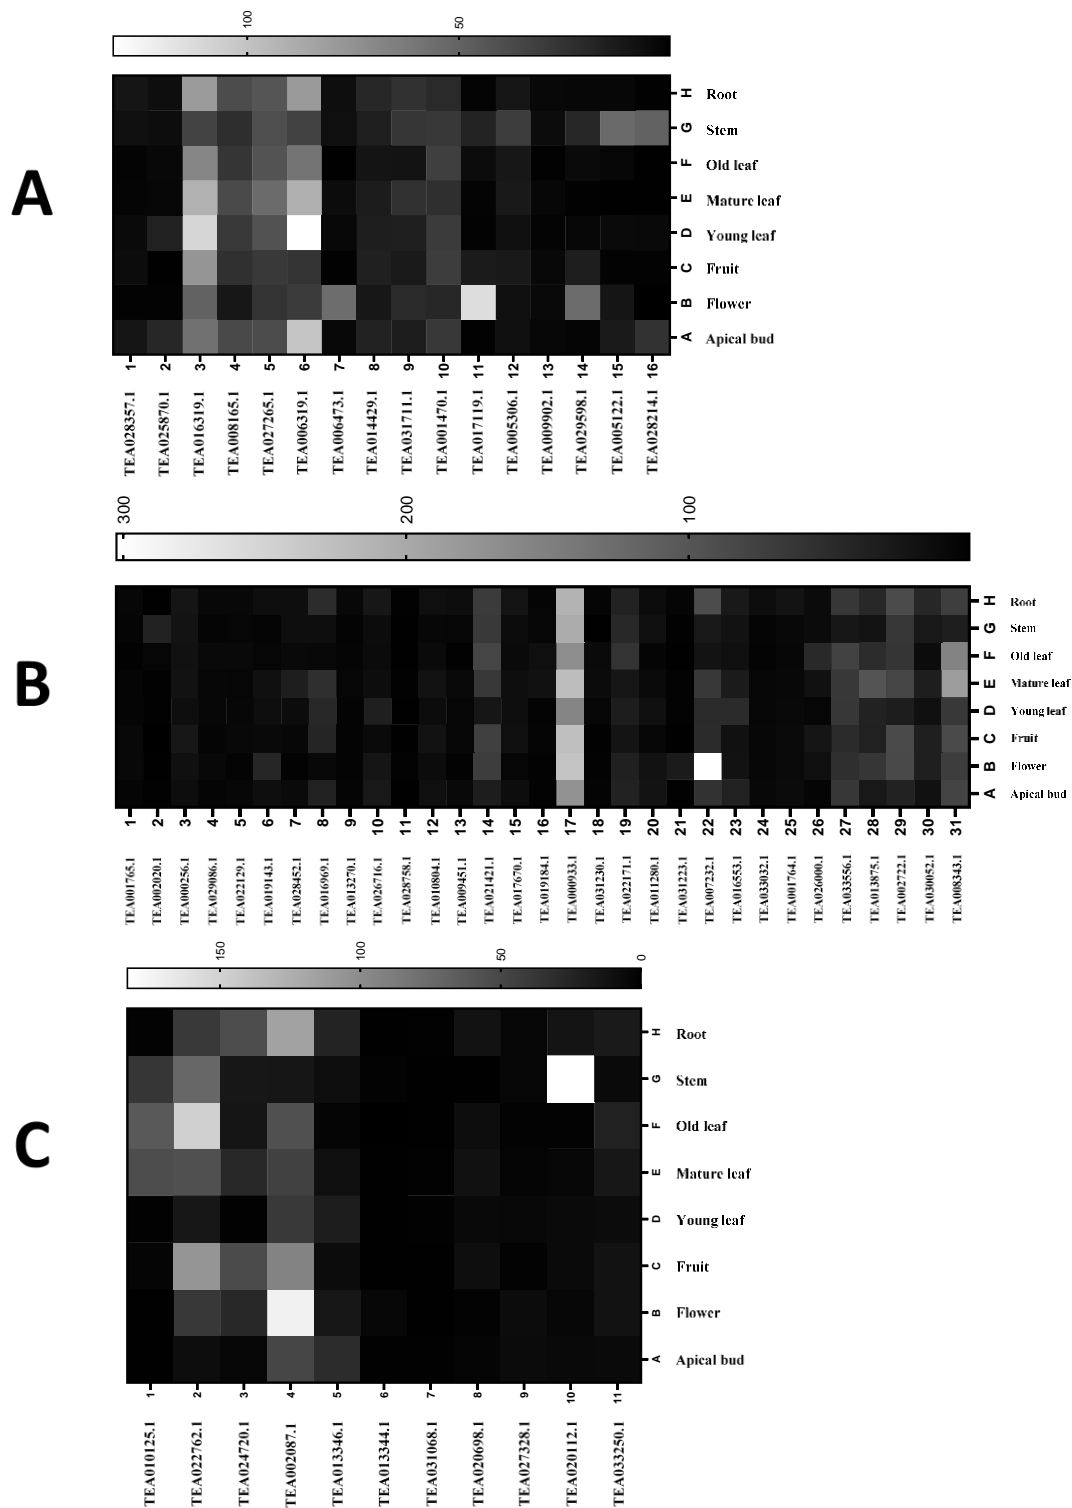

**S9 Fig. Heat maps for tissue-specific expression patterns of A) MEKK; B) Raf and; C) ZIK genes in *C. sinensis*.** The relative expression of these genes were analysed in different tissues, by using GraphPad Prism 8 software. The level of expression was in transcript per million (TPM). The 8 different tissues are represented on the right and the tea genes are marked below.

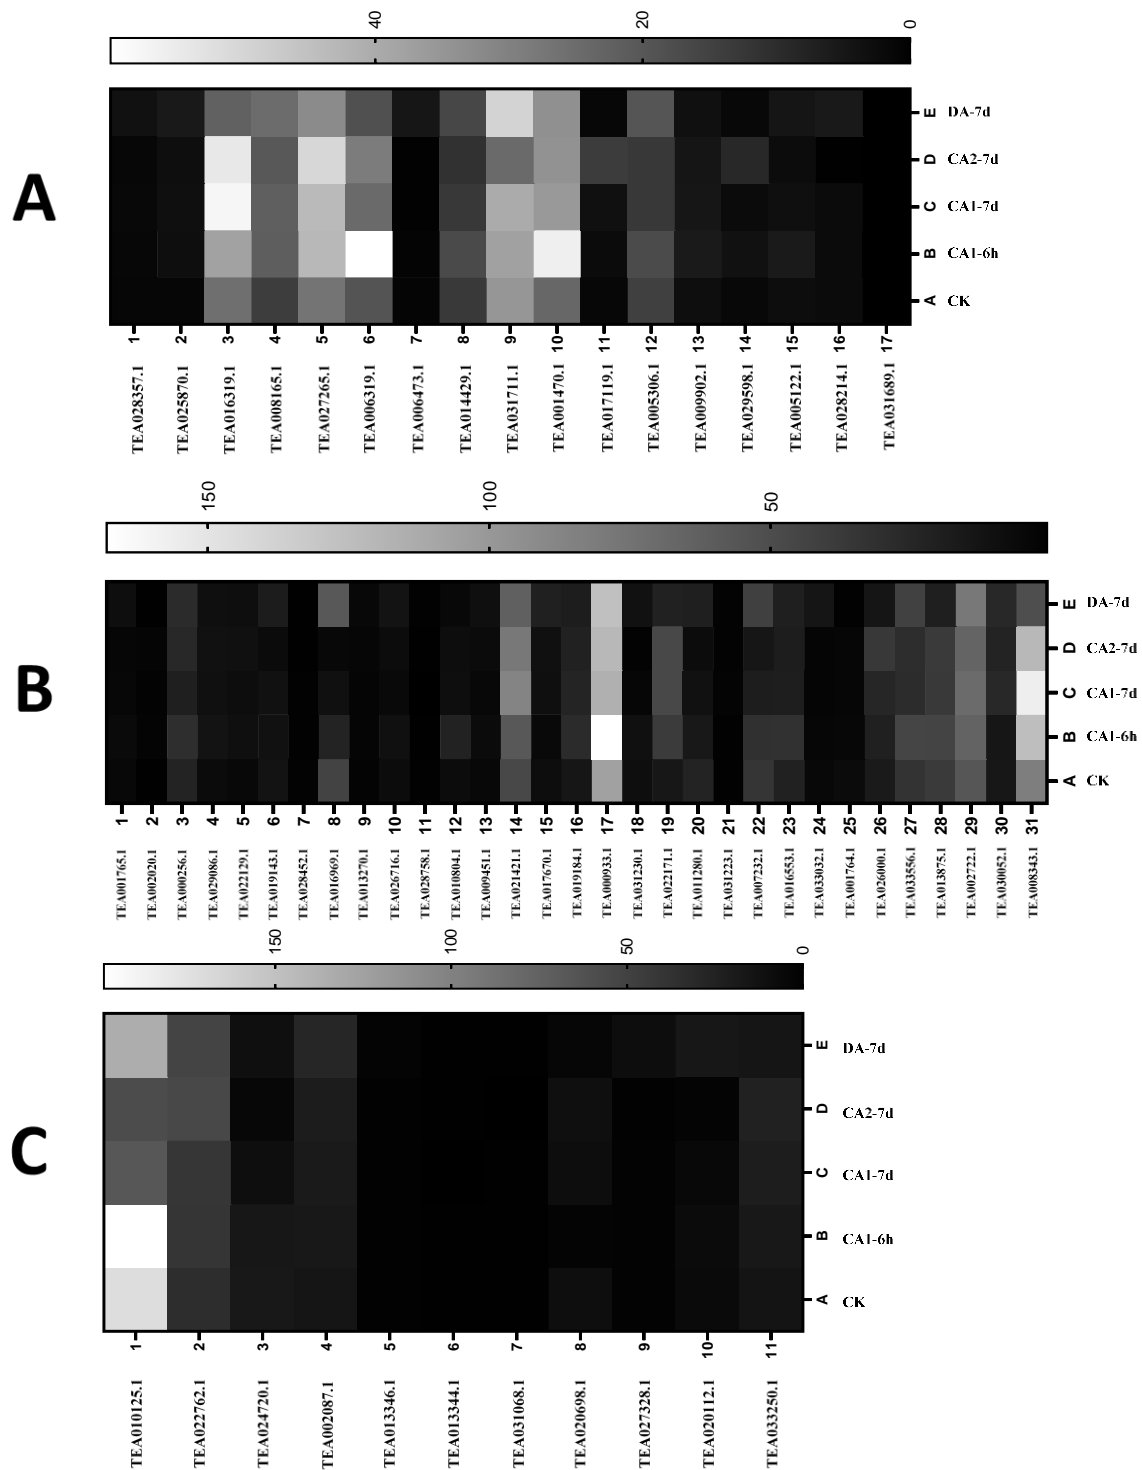

**S10 Fig. Heat maps for cold stress expression patterns of A) MEKK; B) Raf and; C) ZIK genes in *C. sinensis*.** The relative expression of these genes were analysed in different stages, by using GraphPad Prism 8 software. The level of expression was in transcript per million (TPM). The different stages are represented on the right and the tea genes are marked below.

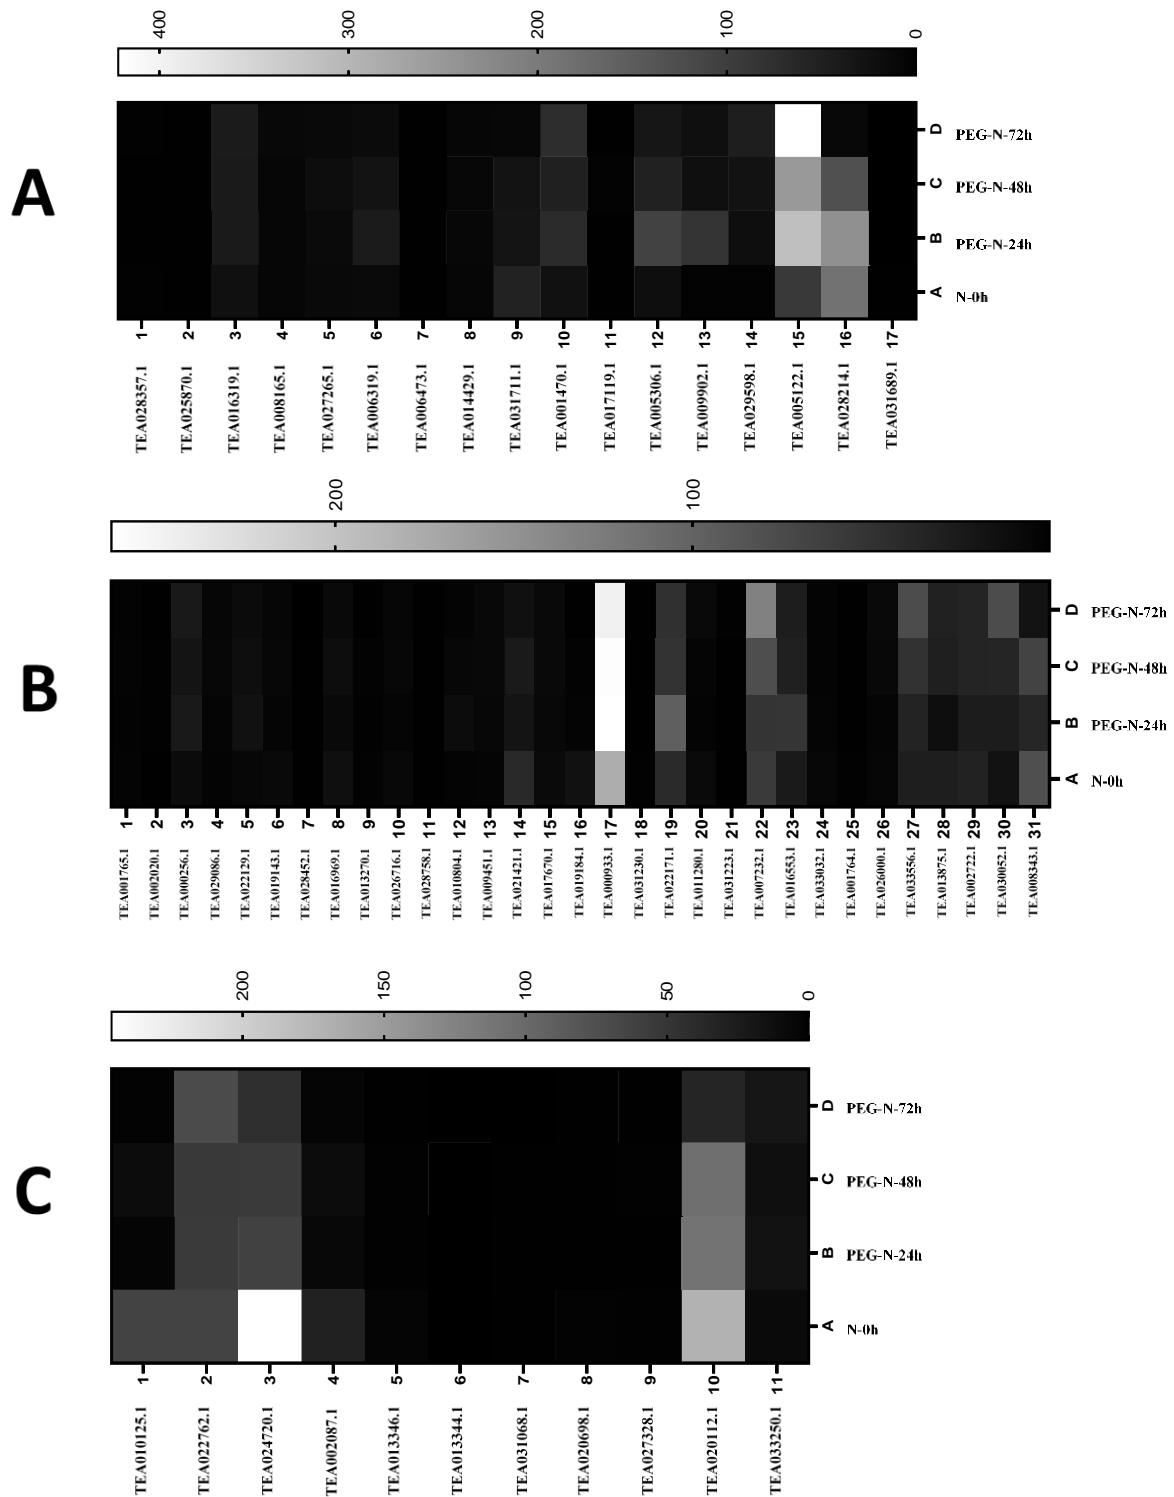

**S11 Fig. Heat maps for drought stress expression patterns of A) MEKK; B) Raf and; C) ZIK genes in *C. sinensis*.** The relative expression of these genes were analysed in different stages, by using GraphPad Prism 8 software. The level of expression was in transcript per million (TPM). The different stages are represented on the right and the tea genes are marked below.

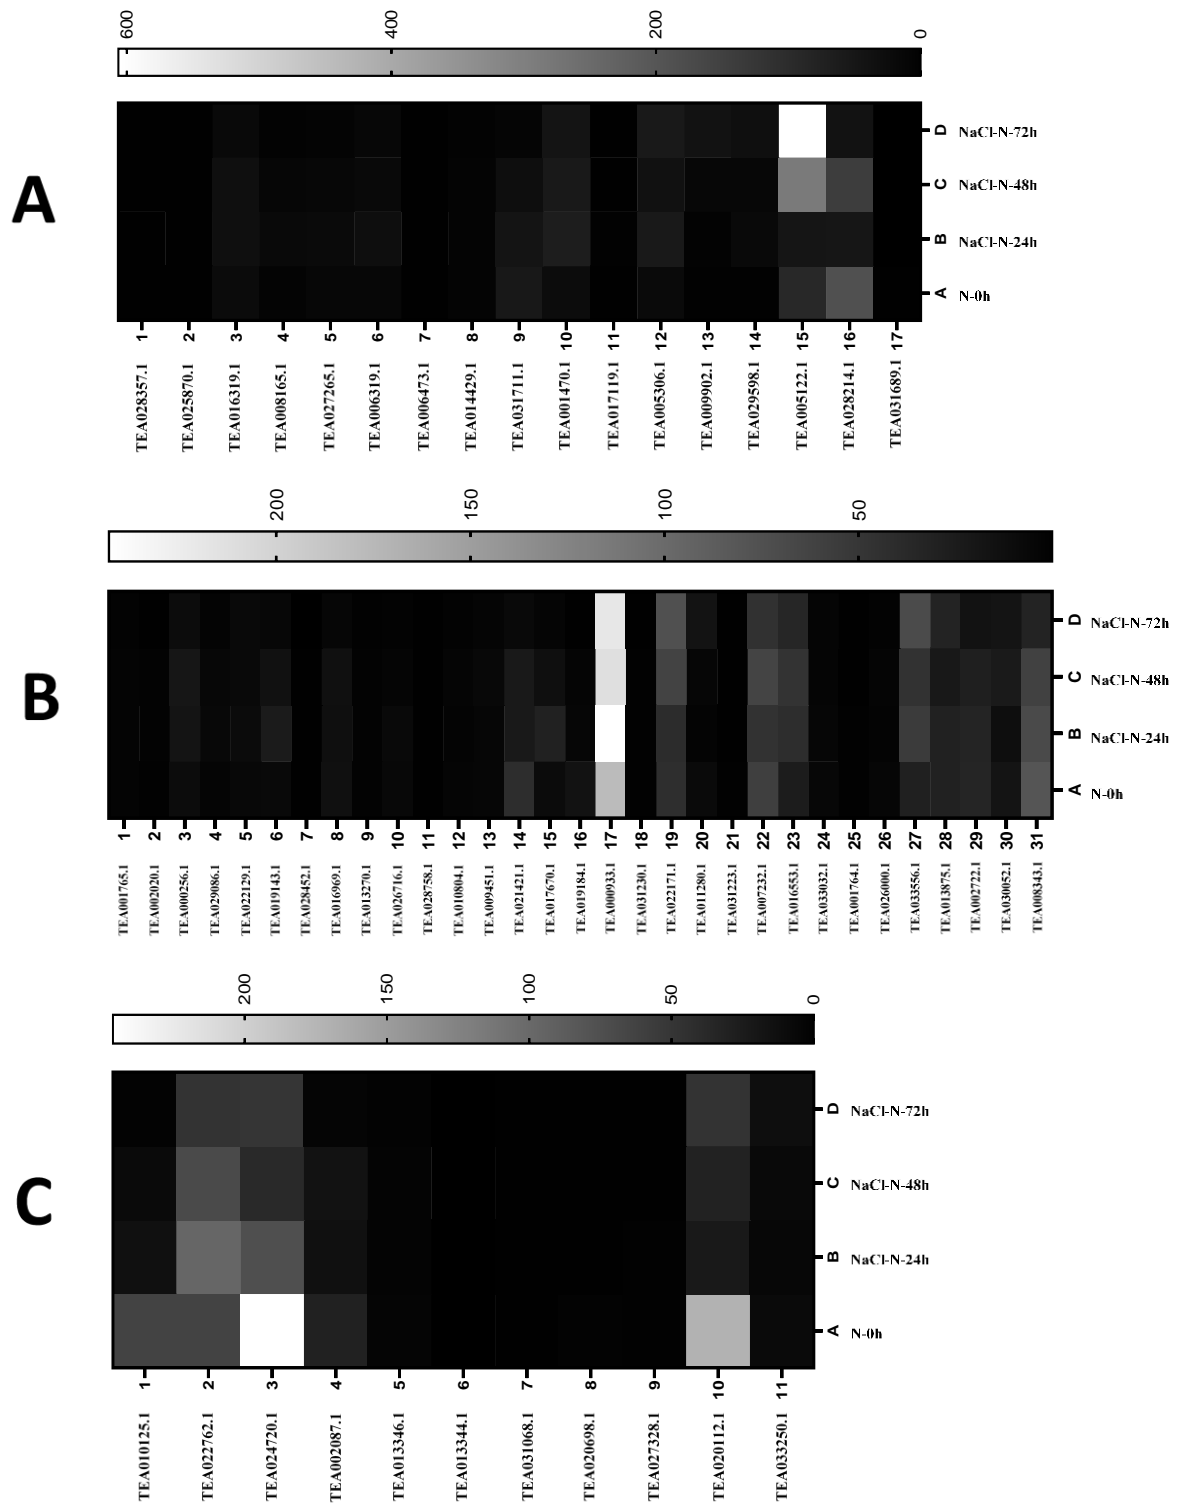

**S12 Fig. Heat maps for salt stress expression patterns of (A) MEKK (B) Raf and (C) ZIK genes in *C. sinensis*.** The relative expression of these genes were analysed in different stages, by using GraphPad Prism 8 software. The level of expression was in transcript per million (TPM). The different stages are represented on the right and the tea genes are marked below.

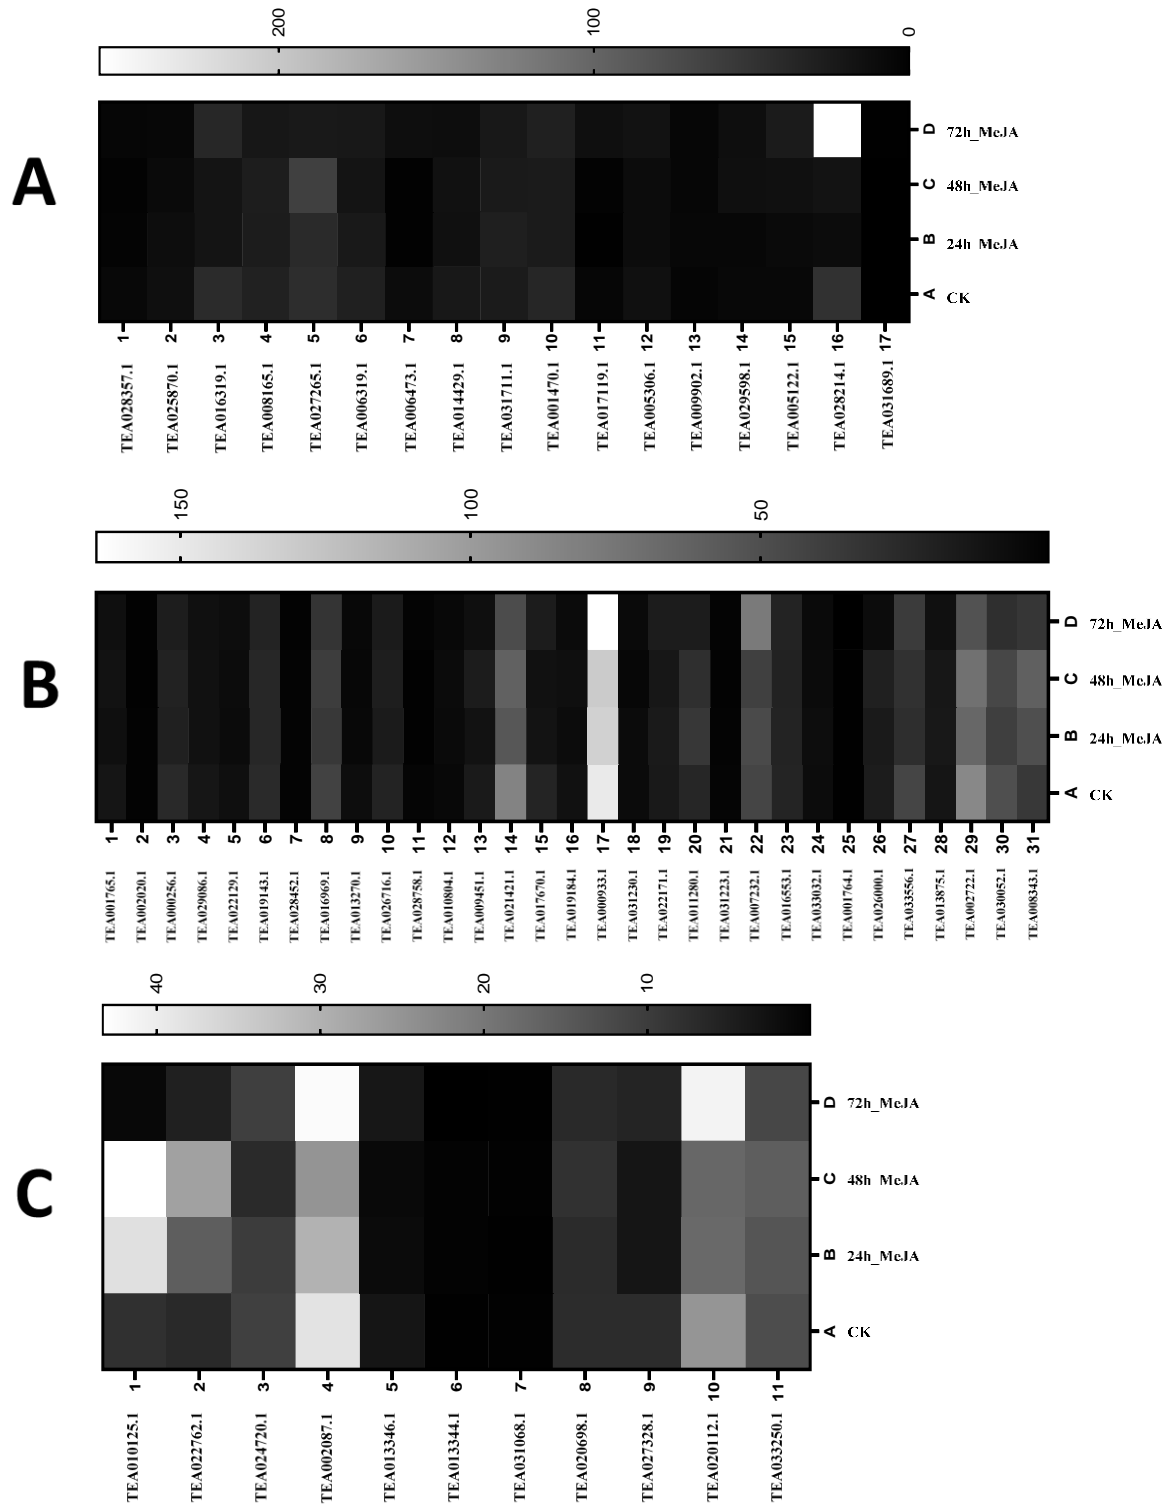

**S13 Fig. Heat maps for MeJA treatment expression patterns of (A) MEKK (B) Raf and (C) ZIK genes in *C. sinensis*.** The relative expression of these genes were analysed in different stages, by using GraphPad Prism 8 software. The level of expression was in transcript per million (TPM). The different stages are represented on the right and the tea genes are marked below.
