# Supplementary material for: In-silico genome wide analysis of Mitogen activated protein kinase kinase kinase gene family in C. sinensis
Source: PubMed Central journal article supplement (PMC8568164; doi:10.1371/journal.pone.0258657), 2021-11-04
Supplement: pone.0258657.s006.pdf [file pone.0258657.s006.pdf]

***In-silico* identification, expressional profile and regulatory network analysis of Mitogen Activated Protein Kinase Kinase Kinase gene family in *C. sinensis***

Abhirup Paul<sup>1†</sup>, Anurag P. Srivastava<sup>1†</sup>, Shreya Subrahmanya<sup>2</sup>, Guoxin Shen<sup>3†\*</sup>, Neelam Mishra<sup>2\*</sup>

<sup>1</sup>Department of Life Sciences

Garden City University

Bangalore, Karnataka,

India

<sup>2</sup>Department of Botany

St. Joseph's College autonomous

Bangalore, Karnataka,

India

<sup>3</sup>Sericultural Research Institute,

Zhejiang Academy of Agricultural Sciences

Hangzhou 310021, China

†These authors contributed equally to this work.

\*Corresponding authors:

Guoxin Shen, Ph.D., Professor, Tel: +86-571-86404298; Fax: +86-571-86404298

Email address: [guoxin.shen@ttu.edu](mailto:guoxin.shen@ttu.edu)

Neelam Mishra, Ph.D., Assistant professor

Email address: [neelamiitkcp@gmail.com](mailto:neelamiitkcp@gmail.com); [neelammishra@sjc.ac.in](mailto:neelammishra@sjc.ac.in)

**Supplementary Table S1: BLAST positives table for MEKK genes of *C. sinensis*.**

| <b>AtMEKK</b> | <b>Tea MEKK</b> | <b>Identities</b> | <b>Positives</b> | <b>Gaps</b> |
|---------------|-----------------|-------------------|------------------|-------------|
| AtMEKK1       | TEA028357.1     | 58%               | 69%              | 7%          |
|               | TEA025870.1     | 53%               | 62%              | 16%         |
| AtMEKK2       | TEA028357.1     | 56%               | 67%              | 9%          |
|               | TEA025870.1     | 52%               | 63%              | 19%         |
| AtMEKK3       | TEA016319.1     | 57%               | 67%              | 10%         |
| AtMEKK4       | TEA008165.1     | 61%               | 71%              | 5%          |
|               | TEA027265.1     | 60%               | 72%              | 5%          |
| AtMEKK5       | TEA006319.1     | 55%               | 66%              | 10%         |
|               | TEA006473.1     | 56%               | 68%              | 9%          |
| AtMEKK6       | TEA014429.1     | 60%               | 71%              | 12%         |
| AtMEKK7       | TEA014429.1     | 64%               | 72%              | 12%         |
| AtMEKK8       | TEA031711.1     | 49%               | 61%              | 12%         |
| AtMEKK9       | TEA001470.1     | 55%               | 68%              | 7%          |
| AtMEKK10      | TEA001470.1     | 56%               | 69%              | 7%          |
| AtMEKK11      | TEA031711.1     | 62%               | 73%              | 6%          |
| AtMEKK12      | TEA025870.1     | 55%               | 66%              | 12%         |
|               | TEA028357.1     | 54%               | 66%              | 10%         |
| AtMEKK13      | TEA017119.1     | 54%               | 68%              | 5%          |
| AtMEKK14      | TEA017119.1     | 54%               | 69%              | 5%          |
| AtMEKK15      | TEA005306.1     | 51%               | 66%              | 6%          |
| AtMEKK16      | TEA009902.1     | 56%               | 69%              | 5%          |
| AtMEKK17      | TEA029598.1     | 44%               | 62%              | 6%          |
| AtMEKK18      | TEA005122.1     | 54%               | 66%              | 8%          |
| AtMEKK19      | TEA028214.1     | 52%               | 67%              | 5%          |
| AtMEKK20      | TEA028214.1     | 50%               | 66%              | 3%          |
| AtMEKK21      | TEA031689.1     | 43%               | 61%              | 10%         |

**Supplementary Table S2: BLAST positives table for Raf genes of *C. sinensis*.**

| <b>AtRaf</b> | <b>Tea Raf</b> | <b>Identities</b> | <b>Positives</b> | <b>Gaps</b> |
|--------------|----------------|-------------------|------------------|-------------|
| AtRaf1       | TEA001765.1    | 60%               | 71%              | 13%         |
|              | TEA002020.1    | 47%               | 59%              | 14%         |
| AtRaf2       | TEA000256.1    | 53%               | 63%              | 14%         |
| AtRaf3       | TEA029086.1    | 48%               | 59%              | 17%         |
| AtRaf4       | TEA022129.1    | 66%               | 79%              | 1%          |
| AtRaf5       | TEA002020.1    | 61%               | 73%              | 10%         |
| AtRaf6       | TEA002020.1    | 61%               | 72%              | 8%          |
| AtRaf7       | TEA019143.1    | 54%               | 68%              | 9%          |
|              | TEA028452.1    | 53%               | 66%              | 13%         |
| AtRaf8       | TEA028452.1    | 50%               | 63%              | 15%         |
|              | TEA019143.1    | 53%               | 67%              | 5%          |
| AtRaf9       | TEA019143.1    | 51%               | 66%              | 6%          |
|              | TEA028452.1    | 52%               | 66%              | 12%         |
| AtRaf10      | TEA028452.1    | 51%               | 65%              | 16%         |
|              | TEA019143.1    | 50%               | 63%              | 15%         |
| AtRaf11      | TEA028452.1    | 52%               | 65%              | 14%         |
|              | TEA019143.1    | 54%               | 68%              | 9%          |
| AtRaf12      | TEA016969.1    | 46%               | 63%              | 3%          |
| AtRaf13      | TEA013270.1    | 54%               | 65%              | 17%         |
| AtRaf14      | TEA026716.1    | 50%               | 60%              | 20%         |
| AtRaf15      | TEA013270.1    | 50%               | 62%              | 15%         |
| AtRaf16      | TEA028758.1    | 72%               | 83%              | 1%          |

|         |             |     |     |     |
|---------|-------------|-----|-----|-----|
| AtRaf17 | TEA010804.1 | 83% | 92% | 0%  |
| AtRaf18 | TEA009451.1 | 68% | 78% | 9%  |
|         | TEA021421.1 | 66% | 75% | 10% |
| AtRaf19 | TEA013789.1 | 86% | 92% | 2%  |
| AtRaf20 | TEA009451.1 | 49% | 60% | 12% |
|         | TEA021421.1 | 68% | 76% | 3%  |
| AtRaf21 | TEA017670.1 | 63% | 77% | 2%  |
|         | TEA019184.1 | 56% | 67% | 12% |
| AtRaf22 | TEA000933.1 | 78% | 87% | 4%  |
| AtRaf23 | TEA031230.1 | 59% | 79% | 20% |
| AtRaf24 | TEA009451.1 | 46% | 59% | 10% |
|         | TEA021421.1 | 67% | 78% | 4%  |
| AtRaf25 | TEA031230.1 | 59% | 69% | 20% |
| AtRaf26 | TEA022171.1 | 74% | 86% | 1%  |
|         | TEA011280.1 | 73% | 83% | 3%  |
|         | TEA031223.1 | 69% | 79% | 9%  |
|         | TEA007232.1 | 66% | 80% | 4%  |
| AtRaf27 | TEA016553.1 | 62% | 73% | 8%  |
| AtRaf28 | TEA000933.1 | 77% | 86% | 4%  |
| AtRaf29 | TEA017670.1 | 65% | 78% | 3%  |
|         | TEA019184.1 | 57% | 68% | 13% |
| AtRaf30 | TEA017670.1 | 70% | 80% | 5%  |
|         | TEA019184.1 | 64% | 72% | 13% |
| AtRaf31 | TEA033032.1 | 68% | 83% | 0%  |

|         |             |     |     |     |
|---------|-------------|-----|-----|-----|
| AtRaf32 | TEA001764.1 | 80% | 88% | 3%  |
|         | TEA033032.1 | 79% | 88% | 2%  |
| AtRaf33 | TEA007232.1 | 82% | 89% | 5%  |
|         | TEA022171.1 | 65% | 78% | 9%  |
|         | TEA011280.1 | 63% | 75% | 11% |
| AtRaf34 | TEA001764.1 | 79% | 88% | 1%  |
|         | TEA033032.1 | 80% | 89% | 0%  |
| AtRaf35 | TEA026000.1 | 52% | 61% | 16% |
| AtRaf36 | TEA033556.1 | 55% | 69% | 14% |
|         | TEA013875.1 | 69% | 84% | 3%  |
| AtRaf37 | TEA033032.1 | 53% | 73% | 1%  |
| AtRaf38 | TEA007232.1 | 77% | 85% | 10% |
|         | TEA022171.1 | 63% | 75% | 13% |
|         | TEA031223.1 | 59% | 69% | 20% |
| AtRaf39 | TEA022171.1 | 76% | 89% | 1%  |
|         | TEA031223.1 | 72% | 83% | 8%  |
|         | TEA011280.1 | 78% | 88% | 3%  |
|         | TEA007232.1 | 69% | 83% | 5%  |
| AtRaf40 | TEA002722.1 | 82% | 89% | 0%  |
| AtRaf41 | TEA033032.1 | 77% | 87% | 1%  |
|         | TEA001764.1 | 78% | 88% | 2%  |
| AtRaf42 | TEA030052.1 | 44% | 56% | 14% |
| AtRaf43 | TEA033556.1 | 47% | 62% | 15% |
| AtRaf44 | TEA033032.1 | 49% | 69% | 1%  |

|         |             |     |     |     |
|---------|-------------|-----|-----|-----|
| AtRaf45 | TEA008343.1 | 48% | 68% | 2%  |
| AtRaf46 | TEA031230.1 | 57% | 68% | 20% |
| AtRaf47 | TEA016553.1 | 61% | 71% | 8%  |
| AtRaf48 | TEA022171.1 | 64% | 76% | 5%  |
|         | TEA011280.1 | 64% | 76% | 6%  |

**Supplementary Table S3:** BLAST positives table for ZIK genes of *C. sinensis*.

| <b>AtZIK</b> | <b>Tea ZIK</b> | <b>Identities</b> | <b>Positives</b> | <b>Gaps</b> |
|--------------|----------------|-------------------|------------------|-------------|
| AtZIK1       | TEA010125.1    | 71%               | 81%              | 3%          |
|              | TEA022762.1    | 59%               | 70%              | 8%          |
|              | TEA024720.1    | 70%               | 82%              | 2%          |
| AtZIK2       | TEA024720.1    | 57%               | 69%              | 10%         |
|              | TEA022762.1    | 60%               | 73%              | 6%          |
|              | TEA010125.1    | 52%               | 65%              | 13%         |
| AtZIK3       | TEA002087.1    | 51%               | 61%              | 24%         |
|              | TEA013346.1    | 47%               | 57%              | 24%         |
|              | TEA013344.1    | 58%               | 68%              | 18%         |
| AtZIK4       | TEA013346.1    | 59%               | 69%              | 13%         |
|              | TEA002087.1    | 60%               | 71%              | 12%         |
|              | TEA013344.1    | 74%               | 84%              | 5%          |
|              | TEA031068.1    | 63%               | 72%              | 10%         |
|              | TEA020698.1    | 58%               | 67%              | 14%         |
| AtZIK5       | TEA027328.1    | 65%               | 77%              | 7%          |

|         |             |     |     |     |
|---------|-------------|-----|-----|-----|
| AtZIK6  | TEA013344.1 | 51% | 68% | 7%  |
| AtZIK7  | TEA027328.1 | 63% | 76% | 7%  |
| AtZIK8  | TEA020112.1 | 81% | 90% | 1%  |
| AtZIK9  | TEA013346.1 | 65% | 77% | 9%  |
|         | TEA013344.1 | 70% | 81% | 5%  |
|         | TEA002087.1 | 64% | 75% | 8%  |
|         | TEA020698.1 | 59% | 71% | 10% |
|         | TEA031068.1 | 59% | 71% | 12% |
| AtZIK10 | TEA013344.1 | 49% | 67% | 5%  |
| AtZIK11 | TEA033250.1 | 68% | 77% | 7%  |

**Supplementary Table S4:** Ka/Ks ratios of MAPKKs of MEKK subfamily in **C. sinensis**.

| Compare | Sequence names          | Sd       | Sn       | S        | N        | ps     | pn     | ds     | dn     | dn/ds  | ds/dn  | ps/pn  |
|---------|-------------------------|----------|----------|----------|----------|--------|--------|--------|--------|--------|--------|--------|
| 0 1     | TEA028357.1 TEA025870.1 | 1055.667 | 4166.333 | 1483.5   | 5761.5   | 0.7116 | 0.7231 | 2.2291 | 2.4969 | 1.1201 | 0.8928 | 0.9841 |
| 0 2     | TEA028357.1 TEA016319.1 | 1069.667 | 4190.333 | 1489.667 | 5755.333 | 0.7181 | 0.7281 | 2.3671 | 2.6494 | 1.1192 | 0.8934 | 0.9862 |
| 0 3     | TEA028357.1 TEA008165.1 | 1132.167 | 4190.833 | 1522.333 | 5722.667 | 0.7437 | 0.7323 | 3.5852 | 2.8108 | 0.784  | 1.2755 | 1.0155 |
| 0 4     | TEA028357.1 TEA027265.1 | 1094.167 | 4198.833 | 1478.333 | 5766.667 | 0.7401 | 0.7281 | 3.2483 | 2.6509 | 0.8161 | 1.2254 | 1.0165 |
| 0 5     | TEA028357.1 TEA006319.1 | 1081     | 4199     | 1505     | 5740     | 0.7183 | 0.7315 | 2.3722 | 2.7781 | 1.1711 | 0.8539 | 0.9819 |
| 0 6     | TEA028357.1 TEA006473.1 | 1079.5   | 4199.5   | 1507.833 | 5737.167 | 0.7159 | 0.732  | 2.3187 | 2.7965 | 1.2061 | 0.8291 | 0.9781 |
| 0 7     | TEA028357.1 TEA014429.1 | 1053.167 | 4154.833 | 1487.5   | 5757.5   | 0.708  | 0.7216 | 2.162  | 2.4563 | 1.1361 | 0.8802 | 0.9811 |
| 0 8     | TEA028357.1 TEA031711.1 | 1127.333 | 4218.667 | 1503.167 | 5741.833 | 0.75   | 0.7347 | 7.6543 | 2.9204 | 0.3815 | 2.621  | 1.0208 |
| 0 9     | TEA028357.1 TEA001470.1 | 1092.333 | 4238.667 | 1484.833 | 5760.167 | 0.7357 | 0.7359 | 2.9678 | 2.9782 | 1.0035 | 0.9965 | 0.9997 |
| 0 10    | TEA028357.1 TEA017119.1 | 682.3333 | 2761.667 | 984      | 3741     | 0.6934 | 0.7382 | 1.9384 | 3.115  | 1.6069 | 0.6223 | 0.9393 |
| 0 11    | TEA028357.1 TEA005306.1 | 1089.333 | 4188.667 | 1498.833 | 5746.167 | 0.7268 | 0.7289 | 2.6065 | 2.6799 | 1.0281 | 0.9726 | 0.997  |
| 0 12    | TEA028357.1 TEA009902.1 | 192.6667 | 761.3333 | 293      | 1057     | 0.6576 | 0.7203 | 1.5702 | 2.4211 | 1.5419 | 0.6485 | 0.9129 |
| 0 13    | TEA028357.1 TEA029598.1 | 401.8333 | 1503.167 | 550.5    | 2044.5   | 0.7299 | 0.7352 | 2.7161 | 2.9453 | 1.0844 | 0.9222 | 0.9928 |
| 0 14    | TEA028357.1 TEA005122.1 | 165.6667 | 566.3333 | 229.3333 | 772.6667 | 0.7224 | 0.733  | 2.4763 | 2.8384 | 1.1462 | 0.8724 | 0.9856 |
| 0 15    | TEA028357.1 TEA028214.1 | 182.1667 | 592.8333 | 237.6667 | 794.3333 | 0.7665 | 0.7463 | nan    | 3.9895 | nan    | nan    | 1.027  |
| 0 16    | TEA028357.1 TEA031689.1 | 154.1667 | 526.8333 | 211.1667 | 721.8333 | 0.7301 | 0.7299 | 2.7209 | 2.7128 | 0.997  | 1.003  | 1.0003 |
| 1 2     | TEA025870.1 TEA016319.1 | 1665.167 | 6641.833 | 2349.333 | 9182.667 | 0.7088 | 0.7233 | 2.1759 | 2.5016 | 1.1497 | 0.8698 | 0.9799 |
| 1 3     | TEA025870.1 TEA008165.1 | 1276.333 | 4658.667 | 1683.167 | 6380.833 | 0.7583 | 0.7301 | nan    | 2.7221 | nan    | nan    | 1.0386 |
| 1 4     | TEA025870.1 TEA027265.1 | 1349.833 | 5390.167 | 1898.667 | 7458.333 | 0.7109 | 0.7227 | 2.2162 | 2.485  | 1.1212 | 0.8918 | 0.9837 |
| 1 5     | TEA025870.1 TEA006319.1 | 1388.333 | 5358.667 | 1880.5   | 7212.5   | 0.7383 | 0.743  | 3.119  | 3.5023 | 1.1223 | 0.8905 | 0.9937 |
| 1 6     | TEA025870.1 TEA006473.1 | 1154.5   | 4452.5   | 1600.333 | 6103.667 | 0.7214 | 0.7295 | 2.4503 | 2.699  | 1.1015 | 0.9079 | 0.9889 |
| 1 7     | TEA025870.1 TEA014429.1 | 2640.5   | 10600.5  | 3726.5   | 14585.5  | 0.7086 | 0.7268 | 2.1721 | 2.6064 | 1.1999 | 0.8334 | 0.9749 |
| 1 8     | TEA025870.1 TEA031711.1 | 1785.333 | 7181.667 | 2530.667 | 9883.333 | 0.7055 | 0.7266 | 2.1181 | 2.6019 | 1.2284 | 0.814  | 0.9709 |
| 1 9     | TEA025870.1 TEA001470.1 | 1862.5   | 7457.5   | 2619.167 | 10280.83 | 0.7111 | 0.7254 | 2.2194 | 2.5624 | 1.1545 | 0.8662 | 0.9803 |
| 1 10    | TEA025870.1 TEA017119.1 | 704.5    | 2738.5   | 980.6667 | 3744.333 | 0.7184 | 0.7314 | 2.3749 | 2.7715 | 1.1669 | 0.8569 | 0.9822 |
| 1 11    | TEA025870.1 TEA005306.1 | 2574     | 10405    | 3653.5   | 14457.5  | 0.7045 | 0.7197 | 2.1023 | 2.4066 | 1.1447 | 0.8735 | 0.9789 |
| 1 12    | TEA025870.1 TEA009902.1 | 201.1667 | 774.8333 | 282.3333 | 1067.667 | 0.7125 | 0.7257 | 2.2471 | 2.573  | 1.145  | 0.8733 | 0.9818 |
| 1 13    | TEA025870.1 TEA029598.1 | 391      | 1512     | 536.5    | 2058.5   | 0.7288 | 0.7345 | 2.6745 | 2.9102 | 1.0881 | 0.919  | 0.9922 |
| 1 14    | TEA025870.1 TEA005122.1 | 161.8333 | 579.1667 | 220.1667 | 781.8333 | 0.735  | 0.7408 | 2.9365 | 3.299  | 1.1234 | 0.8901 | 0.9923 |
| 1 15    | TEA025870.1 TEA028214.1 | 159      | 584      | 228.8333 | 803.1667 | 0.6948 | 0.7271 | 1.9572 | 2.6174 | 1.3373 | 0.7478 | 0.9556 |



|   |    |                         |          |          |          |          |        |        |        |        |        |        |        |
|---|----|-------------------------|----------|----------|----------|----------|--------|--------|--------|--------|--------|--------|--------|
| 1 | 16 | TEA025870.1 TEA031689.1 | 154.6667 | 537.3333 | 204      | 729      | 0.7582 | 0.7371 | nan    | 3.0461 | nan    | nan    | 1.0286 |
| 2 | 3  | TEA016319.1 TEA008165.1 | 1220.833 | 4634.167 | 1690     | 6374     | 0.7224 | 0.727  | 2.4763 | 2.6148 | 1.0559 | 0.947  | 0.9936 |
| 2 | 4  | TEA016319.1 TEA027265.1 | 1460     | 5389     | 1922.667 | 7434.333 | 0.7594 | 0.7249 | nan    | 2.5473 | nan    | nan    | 1.0476 |
| 2 | 5  | TEA016319.1 TEA006319.1 | 1431.167 | 5236.833 | 1902.833 | 7190.167 | 0.7521 | 0.7283 | nan    | 2.6582 | nan    | nan    | 1.0327 |
| 2 | 6  | TEA016319.1 TEA006473.1 | 1180.333 | 4479.667 | 1606.167 | 6097.833 | 0.7349 | 0.7346 | 2.9278 | 2.9159 | 0.9958 | 1.0041 | 1.0003 |
| 2 | 7  | TEA016319.1 TEA014429.1 | 1696.333 | 6646.667 | 2372.667 | 9159.333 | 0.7149 | 0.7257 | 2.2974 | 2.5713 | 1.1192 | 0.8935 | 0.9852 |
| 2 | 8  | TEA016319.1 TEA031711.1 | 1715.5   | 6657.5   | 2382.667 | 9149.333 | 0.72   | 0.7276 | 2.4139 | 2.6349 | 1.0915 | 0.9161 | 0.9895 |
| 2 | 9  | TEA016319.1 TEA001470.1 | 1716.167 | 6739.833 | 2360.667 | 9171.333 | 0.727  | 0.7349 | 2.6129 | 2.9281 | 1.1206 | 0.8924 | 0.9893 |
| 2 | 10 | TEA016319.1 TEA017119.1 | 677.8333 | 2744.167 | 983      | 3742     | 0.6896 | 0.7333 | 1.8888 | 2.8554 | 1.5117 | 0.6615 | 0.9403 |
| 2 | 11 | TEA016319.1 TEA005306.1 | 1691.667 | 6564.333 | 2322.167 | 9008.833 | 0.7285 | 0.7287 | 2.6635 | 2.6694 | 1.0022 | 0.9978 | 0.9998 |
| 2 | 12 | TEA016319.1 TEA009902.1 | 221.5    | 780.5    | 292.8333 | 1057.167 | 0.7564 | 0.7383 | nan    | 3.12   | nan    | nan    | 1.0245 |
| 2 | 13 | TEA016319.1 TEA029598.1 | 400.5    | 1490.5   | 552.6667 | 2042.333 | 0.7247 | 0.7298 | 2.541  | 2.7109 | 1.0668 | 0.9373 | 0.993  |
| 2 | 14 | TEA016319.1 TEA005122.1 | 166      | 569      | 221.6667 | 780.3333 | 0.7489 | 0.7292 | 4.8748 | 2.688  | 0.5514 | 1.8136 | 1.027  |
| 2 | 15 | TEA016319.1 TEA028214.1 | 169.6667 | 591.3333 | 230.8333 | 801.1667 | 0.735  | 0.7381 | 2.9349 | 3.107  | 1.0586 | 0.9446 | 0.9958 |
| 2 | 16 | TEA016319.1 TEA031689.1 | 160.8333 | 548.1667 | 205      | 728      | 0.7846 | 0.753  | nan    | nan    | nan    | nan    | 1.0419 |
| 3 | 4  | TEA008165.1 TEA027265.1 | 1265     | 4649     | 1682.5   | 6381.5   | 0.7519 | 0.7285 | nan    | 2.6644 | nan    | nan    | 1.032  |
| 3 | 5  | TEA008165.1 TEA006319.1 | 1283.667 | 4632.333 | 1720.5   | 6343.5   | 0.7461 | 0.7302 | 3.9445 | 2.7276 | 0.6915 | 1.4461 | 1.0217 |
| 3 | 6  | TEA008165.1 TEA006473.1 | 1197.667 | 4464.333 | 1642.667 | 6061.333 | 0.7291 | 0.7365 | 2.6852 | 3.0145 | 1.1226 | 0.8908 | 0.9899 |
| 3 | 7  | TEA008165.1 TEA014429.1 | 1232.833 | 4650.167 | 1690.5   | 6373.5   | 0.7293 | 0.7296 | 2.6914 | 2.7038 | 1.0046 | 0.9954 | 0.9995 |
| 3 | 8  | TEA008165.1 TEA031711.1 | 1231.167 | 4629.833 | 1704.333 | 6359.667 | 0.7224 | 0.728  | 2.476  | 2.6468 | 1.0689 | 0.9355 | 0.9923 |
| 3 | 9  | TEA008165.1 TEA001470.1 | 1250.5   | 4663.5   | 1692.667 | 6371.333 | 0.7388 | 0.732  | 3.1515 | 2.7952 | 0.8869 | 1.1274 | 1.0093 |
| 3 | 10 | TEA008165.1 TEA017119.1 | 766.5    | 2790.5   | 1009     | 3716     | 0.7597 | 0.7509 | nan    | nan    | nan    | nan    | 1.0116 |
| 3 | 11 | TEA008165.1 TEA005306.1 | 1227.833 | 4680.167 | 1700.333 | 6363.667 | 0.7221 | 0.7355 | 2.4689 | 2.9569 | 1.1976 | 0.835  | 0.9819 |
| 3 | 12 | TEA008165.1 TEA009902.1 | 200      | 781      | 293.8333 | 1056.167 | 0.6807 | 0.7395 | 1.7858 | 3.1991 | 1.7914 | 0.5582 | 0.9205 |
| 3 | 13 | TEA008165.1 TEA029598.1 | 437.3333 | 1513.667 | 559.1667 | 2035.833 | 0.7821 | 0.7435 | nan    | 3.5626 | nan    | nan    | 1.0519 |
| 3 | 14 | TEA008165.1 TEA005122.1 | 177.1667 | 568.8333 | 223.6667 | 778.3333 | 0.7921 | 0.7308 | nan    | 2.7502 | nan    | nan    | 1.0838 |
| 3 | 15 | TEA008165.1 TEA028214.1 | 180.8333 | 588.1667 | 233.3333 | 798.6667 | 0.775  | 0.7364 | nan    | 3.0095 | nan    | nan    | 1.0524 |
| 3 | 16 | TEA008165.1 TEA031689.1 | 157.5    | 537.5    | 202.6667 | 730.3333 | 0.7771 | 0.736  | nan    | 2.9839 | nan    | nan    | 1.0559 |
| 4 | 5  | TEA027265.1 TEA006319.1 | 1397.833 | 5282.167 | 1897     | 7196     | 0.7369 | 0.734  | 3.0336 | 2.8876 | 0.9519 | 1.0506 | 1.0038 |
| 4 | 6  | TEA027265.1 TEA006473.1 | 1178.167 | 4492.833 | 1599.5   | 6104.5   | 0.7366 | 0.736  | 3.0177 | 2.9851 | 0.9892 | 1.0109 | 1.0008 |
| 4 | 7  | TEA027265.1 TEA014429.1 | 1337.333 | 5436.667 | 1909.5   | 7447.5   | 0.7004 | 0.73   | 2.0364 | 2.7182 | 1.3348 | 0.7492 | 0.9594 |
| 4 | 8  | TEA027265.1 TEA031711.1 | 1393.333 | 5419.667 | 1935.333 | 7421.667 | 0.7199 | 0.7302 | 2.4128 | 2.7277 | 1.1305 | 0.8846 | 0.9859 |
| 4 | 9  | TEA027265.1 TEA001470.1 | 1392.833 | 5387.167 | 1912     | 7445     | 0.7285 | 0.7236 | 2.6629 | 2.5099 | 0.9425 | 1.061  | 1.0067 |

|   |    |                         |          |          |          |          |        |        |        |        |        |        |        |
|---|----|-------------------------|----------|----------|----------|----------|--------|--------|--------|--------|--------|--------|--------|
| 4 | 10 | TEA027265.1 TEA017119.1 | 728.5    | 2734.5   | 974      | 3751     | 0.7479 | 0.729  | 4.4254 | 2.6819 | 0.606  | 1.6501 | 1.026  |
| 4 | 11 | TEA027265.1 TEA005306.1 | 1391.167 | 5476.833 | 1921.833 | 7435.167 | 0.7239 | 0.7366 | 2.5179 | 3.0193 | 1.1991 | 0.8339 | 0.9827 |
| 4 | 12 | TEA027265.1 TEA009902.1 | 213.5    | 780.5    | 289.5    | 1060.5   | 0.7375 | 0.736  | 3.0695 | 2.9843 | 0.9722 | 1.0285 | 1.002  |
| 4 | 13 | TEA027265.1 TEA029598.1 | 381.3333 | 1499.667 | 536.1667 | 2058.833 | 0.7112 | 0.7284 | 2.2217 | 2.6607 | 1.1976 | 0.835  | 0.9764 |
| 4 | 14 | TEA027265.1 TEA005122.1 | 154.6667 | 593.3333 | 221.6667 | 780.3333 | 0.6977 | 0.7604 | 1.9979 | nan    | nan    | nan    | 0.9177 |
| 4 | 15 | TEA027265.1 TEA028214.1 | 163.1667 | 599.8333 | 230.5    | 801.5    | 0.7079 | 0.7484 | 2.1597 | 4.6072 | 2.1332 | 0.4688 | 0.9459 |
| 4 | 16 | TEA027265.1 TEA031689.1 | 136      | 553      | 204.3333 | 728.6667 | 0.6656 | 0.7589 | 1.6382 | nan    | nan    | nan    | 0.877  |
| 5 | 6  | TEA006319.1 TEA006473.1 | 1187.333 | 4496.667 | 1627.5   | 6076.5   | 0.7295 | 0.74   | 2.7014 | 3.2388 | 1.1989 | 0.8341 | 0.9859 |
| 5 | 7  | TEA006319.1 TEA014429.1 | 1348.833 | 5220.167 | 1891     | 7202     | 0.7133 | 0.7248 | 2.2628 | 2.5456 | 1.1249 | 0.8889 | 0.9841 |
| 5 | 8  | TEA006319.1 TEA031711.1 | 1416     | 5233     | 1913.833 | 7179.167 | 0.7399 | 0.7289 | 3.2289 | 2.6786 | 0.8296 | 1.2054 | 1.015  |
| 5 | 9  | TEA006319.1 TEA001470.1 | 1357.667 | 5249.333 | 1892.333 | 7200.667 | 0.7175 | 0.729  | 2.3531 | 2.6819 | 1.1397 | 0.8774 | 0.9842 |
| 5 | 10 | TEA006319.1 TEA017119.1 | 703.6667 | 2742.333 | 999.8333 | 3725.167 | 0.7038 | 0.7362 | 2.0901 | 2.9946 | 1.4327 | 0.6979 | 0.956  |
| 5 | 11 | TEA006319.1 TEA005306.1 | 1381     | 5322     | 1902.167 | 7190.833 | 0.726  | 0.7401 | 2.582  | 3.2463 | 1.2572 | 0.7953 | 0.981  |
| 5 | 12 | TEA006319.1 TEA009902.1 | 218.6667 | 815.3333 | 304.1667 | 1045.833 | 0.7189 | 0.7796 | 2.3872 | nan    | nan    | nan    | 0.9221 |
| 5 | 13 | TEA006319.1 TEA029598.1 | 415.3333 | 1507.667 | 560.8333 | 2034.167 | 0.7406 | 0.7412 | 3.2817 | 3.3316 | 1.0152 | 0.985  | 0.9992 |
| 5 | 14 | TEA006319.1 TEA005122.1 | 170      | 599      | 232.5    | 769.5    | 0.7312 | 0.7784 | 2.764  | nan    | nan    | nan    | 0.9393 |
| 5 | 15 | TEA006319.1 TEA028214.1 | 173.5    | 578.5    | 241.3333 | 790.6667 | 0.7189 | 0.7317 | 2.3877 | 2.7833 | 1.1657 | 0.8579 | 0.9826 |
| 5 | 16 | TEA006319.1 TEA031689.1 | 153.8333 | 558.1667 | 214.1667 | 718.8333 | 0.7183 | 0.7765 | 2.3725 | nan    | nan    | nan    | 0.925  |
| 6 | 7  | TEA006473.1 TEA014429.1 | 1154.667 | 4462.333 | 1607.167 | 6096.833 | 0.7184 | 0.7319 | 2.3763 | 2.7935 | 1.1755 | 0.8507 | 0.9816 |
| 6 | 8  | TEA006473.1 TEA031711.1 | 1156.167 | 4423.833 | 1620     | 6084     | 0.7137 | 0.7271 | 2.2708 | 2.6175 | 1.1526 | 0.8675 | 0.9815 |
| 6 | 9  | TEA006473.1 TEA001470.1 | 1173.833 | 4542.167 | 1606.667 | 6097.333 | 0.7306 | 0.7449 | 2.7412 | 3.7495 | 1.3678 | 0.7311 | 0.9807 |
| 6 | 10 | TEA006473.1 TEA017119.1 | 702.8333 | 2687.167 | 992.3333 | 3732.667 | 0.7083 | 0.7199 | 2.1665 | 2.4118 | 1.1132 | 0.8983 | 0.9838 |
| 6 | 11 | TEA006473.1 TEA005306.1 | 1191.667 | 4519.333 | 1614.833 | 6089.167 | 0.738  | 0.7422 | 3.0983 | 3.4237 | 1.105  | 0.9049 | 0.9943 |
| 6 | 12 | TEA006473.1 TEA009902.1 | 221      | 774      | 302.1667 | 1047.833 | 0.7314 | 0.7387 | 2.7721 | 3.1443 | 1.1343 | 0.8816 | 0.9901 |
| 6 | 13 | TEA006473.1 TEA029598.1 | 407.6667 | 1525.333 | 558.8333 | 2036.167 | 0.7295 | 0.7491 | 2.6996 | 5.061  | 1.8747 | 0.5334 | 0.9738 |
| 6 | 14 | TEA006473.1 TEA005122.1 | 164.6667 | 595.3333 | 231.3333 | 770.6667 | 0.7118 | 0.7725 | 2.2332 | nan    | nan    | nan    | 0.9215 |
| 6 | 15 | TEA006473.1 TEA028214.1 | 180.6667 | 591.3333 | 241      | 791      | 0.7497 | 0.7476 | 5.7615 | 4.3013 | 0.7465 | 1.3395 | 1.0028 |
| 6 | 16 | TEA006473.1 TEA031689.1 | 160.1667 | 534.8333 | 214.5    | 718.5    | 0.7467 | 0.7444 | 4.0691 | 3.6696 | 0.9018 | 1.1089 | 1.0031 |
| 7 | 8  | TEA014429.1 TEA031711.1 | 1806.5   | 7228.5   | 2554.167 | 9859.833 | 0.7073 | 0.7331 | 2.149  | 2.8457 | 1.3242 | 0.7552 | 0.9647 |
| 7 | 9  | TEA014429.1 TEA001470.1 | 1846.333 | 7468.667 | 2640.667 | 10259.33 | 0.6992 | 0.728  | 2.019  | 2.6463 | 1.3106 | 0.7629 | 0.9604 |
| 7 | 10 | TEA014429.1 TEA017119.1 | 692.8333 | 2747.167 | 972.6667 | 3752.333 | 0.7123 | 0.7321 | 2.2429 | 2.8024 | 1.2494 | 0.8003 | 0.9729 |
| 7 | 11 | TEA014429.1 TEA005306.1 | 4130     | 15996    | 5660.667 | 21996.33 | 0.7296 | 0.7272 | 2.7033 | 2.6204 | 0.9693 | 1.0316 | 1.0033 |
| 7 | 12 | TEA014429.1 TEA009902.1 | 219.6667 | 802.3333 | 287.5    | 1062.5   | 0.7641 | 0.7551 | nan    | nan    | nan    | nan    | 1.0118 |

|    |    |                         |          |          |          |          |        |        |        |        |        |        |        |
|----|----|-------------------------|----------|----------|----------|----------|--------|--------|--------|--------|--------|--------|--------|
| 7  | 13 | TEA014429.1 TEA029598.1 | 400.1667 | 1492.833 | 541.1667 | 2053.833 | 0.7395 | 0.7269 | 3.1981 | 2.6086 | 0.8157 | 1.226  | 1.0173 |
| 7  | 14 | TEA014429.1 TEA005122.1 | 158.3333 | 582.6667 | 217.8333 | 784.1667 | 0.7269 | 0.743  | 2.6087 | 3.5098 | 1.3454 | 0.7433 | 0.9782 |
| 7  | 15 | TEA014429.1 TEA028214.1 | 158.5    | 583.5    | 227.5    | 804.5    | 0.6967 | 0.7253 | 1.9831 | 2.5598 | 1.2908 | 0.7747 | 0.9606 |
| 7  | 16 | TEA014429.1 TEA031689.1 | 152      | 551      | 197.8333 | 735.1667 | 0.7683 | 0.7495 | nan    | 5.4699 | nan    | nan    | 1.0251 |
| 8  | 9  | TEA031711.1 TEA001470.1 | 1790.667 | 7192.333 | 2542.833 | 9871.167 | 0.7042 | 0.7286 | 2.0969 | 2.6682 | 1.2724 | 0.7859 | 0.9665 |
| 8  | 10 | TEA031711.1 TEA017119.1 | 708.5    | 2751.5   | 992.3333 | 3732.667 | 0.714  | 0.7371 | 2.2769 | 3.0495 | 1.3393 | 0.7466 | 0.9686 |
| 8  | 11 | TEA031711.1 TEA005306.1 | 1767     | 7056     | 2508     | 9705     | 0.7045 | 0.727  | 2.1025 | 2.615  | 1.2437 | 0.804  | 0.969  |
| 8  | 12 | TEA031711.1 TEA009902.1 | 216.1667 | 795.8333 | 307      | 1043     | 0.7041 | 0.763  | 2.0956 | nan    | nan    | nan    | 0.9228 |
| 8  | 13 | TEA031711.1 TEA029598.1 | 408.5    | 1489.5   | 554      | 2041     | 0.7374 | 0.7298 | 3.0627 | 2.7104 | 0.8849 | 1.13   | 1.0104 |
| 8  | 14 | TEA031711.1 TEA005122.1 | 172.1667 | 578.8333 | 236      | 766      | 0.7295 | 0.7557 | 2.7005 | nan    | nan    | nan    | 0.9654 |
| 8  | 15 | TEA031711.1 TEA028214.1 | 175.3333 | 582.6667 | 246.5    | 785.5    | 0.7113 | 0.7418 | 2.223  | 3.385  | 1.5227 | 0.6567 | 0.9589 |
| 8  | 16 | TEA031711.1 TEA031689.1 | 173.8333 | 535.1667 | 218      | 715      | 0.7974 | 0.7485 | nan    | 4.6534 | nan    | nan    | 1.0654 |
| 9  | 10 | TEA001470.1 TEA017119.1 | 732.8333 | 2713.167 | 991.5    | 3733.5   | 0.7391 | 0.7267 | 3.1746 | 2.604  | 0.8203 | 1.2191 | 1.0171 |
| 9  | 11 | TEA001470.1 TEA005306.1 | 1861.167 | 7342.833 | 2599.333 | 10099.67 | 0.716  | 0.727  | 2.3207 | 2.6146 | 1.1266 | 0.8876 | 0.9848 |
| 9  | 12 | TEA001470.1 TEA009902.1 | 225.3333 | 777.6667 | 305      | 1045     | 0.7388 | 0.7442 | 3.153  | 3.6439 | 1.1557 | 0.8653 | 0.9928 |
| 9  | 13 | TEA001470.1 TEA029598.1 | 426.1667 | 1519.833 | 562      | 2033     | 0.7583 | 0.7476 | nan    | 4.3027 | nan    | nan    | 1.0143 |
| 9  | 14 | TEA001470.1 TEA005122.1 | 163.6667 | 588.3333 | 225.6667 | 776.3333 | 0.7253 | 0.7578 | 2.5587 | nan    | nan    | nan    | 0.957  |
| 9  | 15 | TEA001470.1 TEA028214.1 | 178.1667 | 614.8333 | 236      | 796      | 0.7549 | 0.7724 | nan    | nan    | nan    | nan    | 0.9774 |
| 9  | 16 | TEA001470.1 TEA031689.1 | 155.5    | 544.5    | 206.8333 | 726.1667 | 0.7518 | 0.7498 | nan    | 6.2847 | nan    | nan    | 1.0026 |
| 10 | 11 | TEA017119.1 TEA005306.1 | 729.5    | 2761.5   | 1000.667 | 3724.333 | 0.729  | 0.7415 | 2.6822 | 3.3578 | 1.2519 | 0.7988 | 0.9832 |
| 10 | 12 | TEA017119.1 TEA009902.1 | 208.6667 | 766.3333 | 300.5    | 1049.5   | 0.6944 | 0.7302 | 1.9514 | 2.7254 | 1.3966 | 0.716  | 0.951  |
| 10 | 13 | TEA017119.1 TEA029598.1 | 394.1667 | 1452.833 | 548      | 2047     | 0.7193 | 0.7097 | 2.3964 | 2.1935 | 0.9153 | 1.0925 | 1.0134 |
| 10 | 14 | TEA017119.1 TEA005122.1 | 160.6667 | 535.3333 | 231      | 771      | 0.6955 | 0.6943 | 1.9668 | 1.9506 | 0.9918 | 1.0083 | 1.0017 |
| 10 | 15 | TEA017119.1 TEA028214.1 | 159      | 573      | 240.8333 | 791.1667 | 0.6602 | 0.7242 | 1.5919 | 2.5286 | 1.5884 | 0.6296 | 0.9116 |
| 10 | 16 | TEA017119.1 TEA031689.1 | 164      | 537      | 212.6667 | 720.3333 | 0.7712 | 0.7455 | nan    | 3.835  | nan    | nan    | 1.0344 |
| 11 | 12 | TEA005306.1 TEA009902.1 | 219.3333 | 782.6667 | 290      | 1060     | 0.7563 | 0.7384 | nan    | 3.1245 | nan    | nan    | 1.0243 |
| 11 | 13 | TEA005306.1 TEA029598.1 | 420.3333 | 1520.667 | 551      | 2044     | 0.7629 | 0.744  | nan    | 3.617  | nan    | nan    | 1.0254 |
| 11 | 14 | TEA005306.1 TEA005122.1 | 161.6667 | 587.3333 | 219.8333 | 782.1667 | 0.7354 | 0.7509 | 2.9546 | nan    | nan    | nan    | 0.9794 |
| 11 | 15 | TEA005306.1 TEA028214.1 | 181.1667 | 602.8333 | 229.3333 | 802.6667 | 0.79   | 0.751  | nan    | nan    | nan    | nan    | 1.0518 |
| 11 | 16 | TEA005306.1 TEA031689.1 | 136.1667 | 547.8333 | 203.3333 | 729.6667 | 0.6697 | 0.7508 | 1.6755 | nan    | nan    | nan    | 0.8919 |
| 12 | 13 | TEA009902.1 TEA029598.1 | 232.6667 | 795.3333 | 310.5    | 1039.5   | 0.7493 | 0.7651 | 5.2643 | nan    | nan    | nan    | 0.9794 |
| 12 | 14 | TEA009902.1 TEA005122.1 | 152.1667 | 470.8333 | 229.1667 | 772.8333 | 0.664  | 0.6092 | 1.6243 | 1.2547 | 0.7724 | 1.2946 | 1.0899 |
| 12 | 15 | TEA009902.1 TEA028214.1 | 179.6667 | 604.3333 | 238      | 794      | 0.7549 | 0.7611 | nan    | nan    | nan    | nan    | 0.9918 |

|    |    |             |             |          |          |          |          |        |        |        |        |        |        |        |
|----|----|-------------|-------------|----------|----------|----------|----------|--------|--------|--------|--------|--------|--------|--------|
| 12 | 16 | TEA009902.1 | TEA031689.1 | 155.1667 | 510.8333 | 212.1667 | 720.8333 | 0.7313 | 0.7087 | 2.7704 | 2.1739 | 0.7847 | 1.2744 | 1.032  |
| 13 | 14 | TEA029598.1 | TEA005122.1 | 179      | 566      | 237.8333 | 764.1667 | 0.7526 | 0.7407 | nan    | 3.2906 | nan    | nan    | 1.0161 |
| 13 | 15 | TEA029598.1 | TEA028214.1 | 182.5    | 580.5    | 247.1667 | 784.8333 | 0.7384 | 0.7396 | 3.1247 | 3.2121 | 1.0279 | 0.9728 | 0.9983 |
| 13 | 16 | TEA029598.1 | TEA031689.1 | 174.6667 | 549.3333 | 219.8333 | 713.1667 | 0.7945 | 0.7703 | nan    | nan    | nan    | nan    | 1.0315 |
| 14 | 15 | TEA005122.1 | TEA028214.1 | 176.6667 | 575.3333 | 231.6667 | 770.3333 | 0.7626 | 0.7469 | nan    | 4.1076 | nan    | nan    | 1.0211 |
| 14 | 16 | TEA005122.1 | TEA031689.1 | 162.6667 | 523.3333 | 213      | 720      | 0.7637 | 0.7269 | nan    | 2.6086 | nan    | nan    | 1.0507 |
| 15 | 16 | TEA028214.1 | TEA031689.1 | 157      | 530      | 211.3333 | 721.6667 | 0.7429 | 0.7344 | 3.4952 | 2.9051 | 0.8312 | 1.2031 | 1.0116 |

**Supplementary Table S5:** Ka/Ks ratios of MAPKKKs of Raf subfamily in *C. sinensis*.

| Compare | Sequence names          | Sd       | Sn       | S        | N        | ps     | pn     | ds     | dn     | dn/ds  | ds/dn  | ps/pn  |
|---------|-------------------------|----------|----------|----------|----------|--------|--------|--------|--------|--------|--------|--------|
| 0 1     | TEA001765.1 TEA002020.1 | 1296.667 | 5003.333 | 1789.833 | 6814.167 | 0.7245 | 0.7343 | 2.5349 | 2.8976 | 1.1431 | 0.8748 | 0.9867 |
| 0 2     | TEA001765.1 TEA000256.1 | 3345.167 | 12874.83 | 4635.333 | 17645.67 | 0.7217 | 0.7296 | 2.457  | 2.7046 | 1.1001 | 0.9085 | 0.9891 |
| 0 3     | TEA001765.1 TEA029086.1 | 3879.667 | 14816.33 | 5277.833 | 20195.17 | 0.7351 | 0.7337 | 2.9384 | 2.8697 | 0.9766 | 1.0239 | 1.0019 |
| 0 4     | TEA001765.1 TEA022129.1 | 3298.833 | 12814.17 | 4545.833 | 17633.17 | 0.7257 | 0.7267 | 2.5717 | 2.604  | 1.1025 | 0.9876 | 0.9986 |
| 0 5     | TEA001765.1 TEA019143.1 | 1029.333 | 4005.667 | 1400     | 5443     | 0.7352 | 0.7359 | 2.946  | 2.982  | 1.0122 | 0.9879 | 0.9991 |
| 0 6     | TEA001765.1 TEA028452.1 | 1660.167 | 6538.833 | 2310     | 8895     | 0.7187 | 0.7351 | 2.382  | 2.9397 | 1.2341 | 0.8103 | 0.9777 |
| 0 7     | TEA001765.1 TEA016969.1 | 3499.167 | 13627.83 | 4833.167 | 18836.83 | 0.724  | 0.7235 | 2.5212 | 2.5063 | 0.9941 | 1.006  | 1.0007 |
| 0 8     | TEA001765.1 TEA013270.1 | 3347.167 | 13028.83 | 4624.333 | 18001.67 | 0.7238 | 0.7238 | 2.5162 | 2.5145 | 0.9993 | 1.0007 | 1.0001 |
| 0 9     | TEA001765.1 TEA026716.1 | 1680     | 6533     | 2336.5   | 8910.5   | 0.719  | 0.7332 | 2.3901 | 2.8481 | 1.1916 | 0.8392 | 0.9807 |
| 0 10    | TEA001765.1 TEA028758.1 | 1065.667 | 4251.333 | 1497.833 | 5756.167 | 0.7115 | 0.7386 | 2.2265 | 3.1379 | 1.4093 | 0.7096 | 0.9633 |
| 0 11    | TEA001765.1 TEA010804.1 | 2160.333 | 8319.667 | 2940.667 | 11426.33 | 0.7346 | 0.7281 | 2.9163 | 2.6506 | 0.9089 | 1.1002 | 1.009  |
| 0 12    | TEA001765.1 TEA009451.1 | 1447.833 | 5565.167 | 1953.667 | 7568.333 | 0.7411 | 0.7353 | 3.3243 | 2.9503 | 0.8875 | 1.1267 | 1.0078 |
| 0 13    | TEA001765.1 TEA021421.1 | 1785.667 | 6922.333 | 2460.667 | 9434.333 | 0.7257 | 0.7337 | 2.5717 | 2.8735 | 1.1173 | 0.895  | 0.989  |
| 0 14    | TEA001765.1 TEA017670.1 | 2231.667 | 9020.333 | 3203.833 | 12555.17 | 0.6966 | 0.7185 | 1.9812 | 2.3765 | 1.1995 | 0.8336 | 0.9695 |
| 0 15    | TEA001765.1 TEA019184.1 | 1615.333 | 6381.667 | 2260.833 | 8734.167 | 0.7145 | 0.7307 | 2.2876 | 2.7432 | 1.1992 | 0.8339 | 0.9779 |
| 0 16    | TEA001765.1 TEA000933.1 | 1903.833 | 7586.167 | 2668.167 | 10447.83 | 0.7135 | 0.7261 | 2.2678 | 2.5846 | 1.1397 | 0.8774 | 0.9827 |
| 0 17    | TEA001765.1 TEA031230.1 | 1410.333 | 5420.667 | 1920     | 7392     | 0.7345 | 0.7333 | 2.9118 | 2.8542 | 0.9802 | 1.0202 | 1.0017 |
| 0 18    | TEA001765.1 TEA022171.1 | 1020     | 3932     | 1411.5   | 5422.5   | 0.7226 | 0.7251 | 2.4831 | 2.5547 | 1.0288 | 0.972  | 0.9966 |
| 0 19    | TEA001765.1 TEA011280.1 | 969.5    | 3700.5   | 1329.833 | 5078.167 | 0.729  | 0.7287 | 2.683  | 2.6713 | 0.9956 | 1.0044 | 1.0005 |
| 0 20    | TEA001765.1 TEA031223.1 | 604.3333 | 2464.667 | 880.6667 | 3361.333 | 0.6862 | 0.7332 | 1.8485 | 2.8508 | 1.5422 | 0.6484 | 0.9359 |
| 0 21    | TEA001765.1 TEA007232.1 | 1170.5   | 4481.5   | 1631.5   | 6189.5   | 0.7174 | 0.724  | 2.3527 | 2.5229 | 1.0723 | 0.9325 | 0.9909 |
| 0 22    | TEA001765.1 TEA016553.1 | 2400.5   | 9287.5   | 3331     | 12692    | 0.7207 | 0.7318 | 2.4307 | 2.7873 | 1.1467 | 0.872  | 0.9848 |

|      |                         |          |          |          |          |        |        |        |        |        |        |        |
|------|-------------------------|----------|----------|----------|----------|--------|--------|--------|--------|--------|--------|--------|
| 0 23 | TEA001765.1 TEA033032.1 | 2066.333 | 8222.667 | 2910.667 | 11282.33 | 0.7099 | 0.7288 | 2.1969 | 2.6749 | 1.2176 | 0.8213 | 0.9741 |
| 0 24 | TEA001765.1 TEA001764.1 | 678.8333 | 2775.167 | 957.3333 | 3704.667 | 0.7091 | 0.7491 | 2.1815 | 5.0443 | 2.3123 | 0.4325 | 0.9466 |
| 0 25 | TEA001765.1 TEA026000.1 | 1557     | 6167     | 2164.5   | 8371.5   | 0.7193 | 0.7367 | 2.3977 | 3.0223 | 1.2605 | 0.7933 | 0.9765 |
| 0 26 | TEA001765.1 TEA033556.1 | 536.6667 | 2015.333 | 728.5    | 2709.5   | 0.7367 | 0.7438 | 3.0227 | 3.597  | 1.19   | 0.8404 | 0.9904 |
| 0 27 | TEA001765.1 TEA013875.1 | 652.8333 | 2519.167 | 911      | 3430     | 0.7166 | 0.7345 | 2.3339 | 2.9071 | 1.2456 | 0.8028 | 0.9757 |
| 0 28 | TEA001765.1 TEA002722.1 | 1693     | 6628     | 2339.667 | 9003.333 | 0.7236 | 0.7362 | 2.5102 | 2.995  | 1.1931 | 0.8381 | 0.9829 |
| 0 29 | TEA001765.1 TEA030052.1 | 1292.667 | 4960.333 | 1764     | 6696     | 0.7328 | 0.7408 | 2.8316 | 3.2999 | 1.1654 | 0.8581 | 0.9892 |
| 0 30 | TEA001765.1 TEA008343.1 | 1154.833 | 4601.167 | 1611     | 6240     | 0.7168 | 0.7374 | 2.3391 | 3.0628 | 1.3094 | 0.7637 | 0.9722 |
| 1 2  | TEA002020.1 TEA000256.1 | 1341     | 4994     | 1807.167 | 6796.833 | 0.742  | 0.7348 | 3.4098 | 2.9218 | 0.8569 | 1.167  | 1.0099 |
| 1 3  | TEA002020.1 TEA029086.1 | 1444.5   | 4973.5   | 1857.333 | 6746.667 | 0.7777 | 0.7372 | nan    | 3.0517 | nan    | nan    | 1.055  |
| 1 4  | TEA002020.1 TEA022129.1 | 1303.5   | 4953.5   | 1798.333 | 6805.667 | 0.7248 | 0.7278 | 2.546  | 2.6417 | 1.0376 | 0.9638 | 0.9959 |
| 1 5  | TEA002020.1 TEA019143.1 | 1016.333 | 4041.667 | 1410.667 | 5432.333 | 0.7205 | 0.744  | 2.4258 | 3.6215 | 1.4929 | 0.6698 | 0.9684 |
| 1 6  | TEA002020.1 TEA028452.1 | 1253.333 | 5005.667 | 1797.5   | 6806.5   | 0.6973 | 0.7354 | 1.9911 | 2.9555 | 1.4843 | 0.6737 | 0.9481 |
| 1 7  | TEA002020.1 TEA016969.1 | 1306.833 | 5004.167 | 1807.167 | 6796.833 | 0.7231 | 0.7362 | 2.4971 | 2.9993 | 1.2011 | 0.8326 | 0.9822 |
| 1 8  | TEA002020.1 TEA013270.1 | 1272.333 | 5035.667 | 1809.167 | 6794.833 | 0.7033 | 0.7411 | 2.0818 | 3.3257 | 1.5975 | 0.626  | 0.949  |
| 1 9  | TEA002020.1 TEA026716.1 | 1313.167 | 4927.833 | 1786.667 | 6817.333 | 0.735  | 0.7228 | 2.9331 | 2.4887 | 0.8485 | 1.1786 | 1.0168 |
| 1 10 | TEA002020.1 TEA028758.1 | 1073.833 | 4242.167 | 1515.833 | 5738.167 | 0.7084 | 0.7393 | 2.1692 | 3.1866 | 1.469  | 0.6807 | 0.9582 |
| 1 11 | TEA002020.1 TEA010804.1 | 1280     | 4983     | 1789.667 | 6814.333 | 0.7152 | 0.7313 | 2.3032 | 2.7668 | 1.2013 | 0.8325 | 0.9781 |
| 1 12 | TEA002020.1 TEA009451.1 | 1285.5   | 5051.5   | 1790     | 6814     | 0.7182 | 0.7413 | 2.3694 | 3.3461 | 1.4122 | 0.7081 | 0.9687 |
| 1 13 | TEA002020.1 TEA021421.1 | 1315.167 | 5104.833 | 1817.167 | 6786.833 | 0.7237 | 0.7522 | 2.5142 | nan    | nan    | nan    | 0.9622 |
| 1 14 | TEA002020.1 TEA017670.1 | 1349     | 5062     | 1778.5   | 6825.5   | 0.7585 | 0.7416 | nan    | 3.3716 | nan    | nan    | 1.0228 |
| 1 15 | TEA002020.1 TEA019184.1 | 1272.333 | 4963.667 | 1797     | 6807     | 0.708  | 0.7292 | 2.1624 | 2.6889 | 1.2435 | 0.8042 | 0.971  |
| 1 16 | TEA002020.1 TEA000933.1 | 1317.167 | 4910.833 | 1799.833 | 6804.167 | 0.7318 | 0.7217 | 2.7901 | 2.4589 | 0.8813 | 1.1347 | 1.014  |
| 1 17 | TEA002020.1 TEA031230.1 | 1301.667 | 4949.333 | 1801.667 | 6802.333 | 0.7225 | 0.7276 | 2.4788 | 2.633  | 1.0622 | 0.9414 | 0.993  |
| 1 18 | TEA002020.1 TEA022171.1 | 1028.667 | 3886.333 | 1422.167 | 5411.833 | 0.7233 | 0.7181 | 2.5018 | 2.3685 | 0.9467 | 1.0563 | 1.0072 |
| 1 19 | TEA002020.1 TEA011280.1 | 973.8333 | 3719.167 | 1339.833 | 5068.167 | 0.7268 | 0.7338 | 2.608  | 2.8776 | 1.1034 | 0.9063 | 0.9905 |
| 1 20 | TEA002020.1 TEA031223.1 | 643.6667 | 2409.333 | 889.5    | 3352.5   | 0.7236 | 0.7187 | 2.5108 | 2.3816 | 0.9485 | 1.0543 | 1.0069 |
| 1 21 | TEA002020.1 TEA007232.1 | 1183     | 4545     | 1652     | 6169     | 0.7161 | 0.7367 | 2.3225 | 3.027  | 1.3033 | 0.7673 | 0.972  |
| 1 22 | TEA002020.1 TEA016553.1 | 1294.667 | 4978.333 | 1781     | 6823     | 0.7269 | 0.7296 | 2.6112 | 2.7049 | 1.0359 | 0.9654 | 0.9963 |
| 1 23 | TEA002020.1 TEA033032.1 | 1279.833 | 4969.167 | 1772.333 | 6831.667 | 0.7221 | 0.7274 | 2.4691 | 2.6257 | 1.0634 | 0.9404 | 0.9928 |
| 1 24 | TEA002020.1 TEA001764.1 | 710      | 2748     | 969.6667 | 3692.333 | 0.7322 | 0.7442 | 2.8061 | 3.6525 | 1.3016 | 0.7683 | 0.9838 |
| 1 25 | TEA002020.1 TEA026000.1 | 1292.833 | 5040.167 | 1805.5   | 6798.5   | 0.7161 | 0.7414 | 2.3215 | 3.3481 | 1.4422 | 0.6934 | 0.9659 |
| 1 26 | TEA002020.1 TEA033556.1 | 506      | 2032     | 729.5    | 2708.5   | 0.6936 | 0.7502 | 1.941  | nan    | nan    | nan    | 0.9245 |

|   |    |                         |          |          |          |          |        |        |        |        |        |        |        |
|---|----|-------------------------|----------|----------|----------|----------|--------|--------|--------|--------|--------|--------|--------|
| 1 | 27 | TEA002020.1 TEA013875.1 | 672.8333 | 2515.167 | 918.8333 | 3422.167 | 0.7323 | 0.735  | 2.8086 | 2.9322 | 1.044  | 0.9578 | 0.9963 |
| 1 | 28 | TEA002020.1 TEA002722.1 | 1318.333 | 5016.667 | 1809.833 | 6794.167 | 0.7284 | 0.7384 | 2.6615 | 3.1254 | 1.1743 | 0.8516 | 0.9865 |
| 1 | 29 | TEA002020.1 TEA030052.1 | 1308.5   | 4826.5   | 1790.333 | 6669.667 | 0.7309 | 0.7236 | 2.7516 | 2.5114 | 0.9127 | 1.0956 | 1.01   |
| 1 | 30 | TEA002020.1 TEA008343.1 | 1171     | 4605     | 1631.667 | 6219.333 | 0.7177 | 0.7404 | 2.3581 | 3.2713 | 1.3873 | 0.7208 | 0.9693 |
| 2 | 3  | TEA000256.1 TEA029086.1 | 3420.167 | 12815.83 | 4714.167 | 17515.83 | 0.7255 | 0.7317 | 2.5663 | 2.7837 | 1.0847 | 0.9219 | 0.9916 |
| 2 | 4  | TEA000256.1 TEA022129.1 | 3309.167 | 12861.83 | 4639.667 | 17539.33 | 0.7132 | 0.7333 | 2.2616 | 2.8541 | 1.262  | 0.7924 | 0.9726 |
| 2 | 5  | TEA000256.1 TEA019143.1 | 1003.333 | 3986.667 | 1404     | 5439     | 0.7146 | 0.733  | 2.2905 | 2.8392 | 1.2395 | 0.8068 | 0.975  |
| 2 | 6  | TEA000256.1 TEA028452.1 | 1725.833 | 6527.167 | 2348.667 | 8856.333 | 0.7348 | 0.737  | 2.9248 | 3.0417 | 1.04   | 0.9616 | 0.997  |
| 2 | 7  | TEA000256.1 TEA016969.1 | 3296.667 | 12940.33 | 4635.167 | 17645.83 | 0.7112 | 0.7333 | 2.2218 | 2.8551 | 1.285  | 0.7782 | 0.9699 |
| 2 | 8  | TEA000256.1 TEA013270.1 | 3364.667 | 12887.33 | 4646.167 | 17634.83 | 0.7242 | 0.7308 | 2.5267 | 2.7484 | 1.0877 | 0.9193 | 0.991  |
| 2 | 9  | TEA000256.1 TEA026716.1 | 1738     | 6479     | 2375.333 | 8871.667 | 0.7317 | 0.7303 | 2.7843 | 2.7297 | 0.982  | 1.02   | 1.0019 |
| 2 | 10 | TEA000256.1 TEA028758.1 | 1100.5   | 4228.5   | 1509.667 | 5744.333 | 0.729  | 0.7361 | 2.6806 | 2.992  | 1.1162 | 0.8959 | 0.9903 |
| 2 | 11 | TEA000256.1 TEA010804.1 | 2131     | 8342     | 3007.167 | 11359.83 | 0.7086 | 0.7343 | 2.1733 | 2.9018 | 1.3352 | 0.749  | 0.965  |
| 2 | 12 | TEA000256.1 TEA009451.1 | 1437.833 | 5562.167 | 1980.167 | 7541.833 | 0.7261 | 0.7375 | 2.5852 | 3.0713 | 1.188  | 0.8417 | 0.9846 |
| 2 | 13 | TEA000256.1 TEA021421.1 | 1796.167 | 6922.833 | 2508.167 | 9386.833 | 0.7161 | 0.7375 | 2.3231 | 3.071  | 1.3219 | 0.7565 | 0.971  |
| 2 | 14 | TEA000256.1 TEA017670.1 | 2358     | 9123     | 3296.667 | 12462.33 | 0.7153 | 0.732  | 2.3043 | 2.7992 | 1.2148 | 0.8232 | 0.9771 |
| 2 | 15 | TEA000256.1 TEA019184.1 | 1645.833 | 6325.167 | 2300.667 | 8694.333 | 0.7154 | 0.7275 | 2.3066 | 2.6301 | 1.1402 | 0.877  | 0.9833 |
| 2 | 16 | TEA000256.1 TEA000933.1 | 1969.167 | 7568.833 | 2715.333 | 10400.67 | 0.7252 | 0.7277 | 2.557  | 2.6375 | 1.0315 | 0.9695 | 0.9965 |
| 2 | 17 | TEA000256.1 TEA031230.1 | 1379.833 | 5412.167 | 1946.667 | 7365.333 | 0.7088 | 0.7348 | 2.1766 | 2.9249 | 1.3438 | 0.7442 | 0.9646 |
| 2 | 18 | TEA000256.1 TEA022171.1 | 1016.167 | 3952.833 | 1415     | 5419     | 0.7181 | 0.7294 | 2.369  | 2.6975 | 1.1387 | 0.8782 | 0.9845 |
| 2 | 19 | TEA000256.1 TEA011280.1 | 949.6667 | 3728.333 | 1336     | 5072     | 0.7108 | 0.7351 | 2.2141 | 2.9381 | 1.327  | 0.7536 | 0.967  |
| 2 | 20 | TEA000256.1 TEA031223.1 | 650.5    | 2444.5   | 884.8333 | 3357.167 | 0.7352 | 0.7281 | 2.9424 | 2.6517 | 0.9012 | 1.1096 | 1.0096 |
| 2 | 21 | TEA000256.1 TEA007232.1 | 1198.833 | 4475.167 | 1639.667 | 6181.333 | 0.7311 | 0.724  | 2.7625 | 2.5209 | 0.1925 | 1.0958 | 1.0099 |
| 2 | 22 | TEA000256.1 TEA016553.1 | 2552.5   | 9218.5   | 3429.833 | 12593.17 | 0.7442 | 0.732  | 3.6473 | 2.7983 | 0.6772 | 1.3034 | 1.0166 |
| 2 | 23 | TEA000256.1 TEA033032.1 | 2184.5   | 8164.5   | 2976.5   | 11216.5  | 0.7339 | 0.7279 | 2.8817 | 2.6434 | 0.9173 | 1.0901 | 1.0083 |
| 2 | 24 | TEA000256.1 TEA001764.1 | 713      | 2705     | 964.1667 | 3697.833 | 0.7395 | 0.7315 | 3.2014 | 2.7771 | 0.8675 | 1.1528 | 1.0109 |
| 2 | 25 | TEA000256.1 TEA026000.1 | 1587     | 6122     | 2198.167 | 8337.833 | 0.722  | 0.7342 | 2.465  | 2.8971 | 1.1753 | 0.8508 | 0.9833 |
| 2 | 26 | TEA000256.1 TEA033556.1 | 547.3333 | 2002.667 | 729.6667 | 2708.333 | 0.7501 | 0.7394 | nan    | 3.1977 | nan    | nan    | 1.0144 |
| 2 | 27 | TEA000256.1 TEA013875.1 | 673.6667 | 2492.333 | 914.1667 | 3426.833 | 0.7369 | 0.7273 | 3.0367 | 2.6233 | 0.8639 | 1.1576 | 1.0132 |
| 2 | 28 | TEA000256.1 TEA002722.1 | 1749.833 | 6600.167 | 2376.667 | 8966.333 | 0.7363 | 0.7361 | 2.9996 | 2.9914 | 0.9973 | 1.0027 | 1.0002 |
| 2 | 29 | TEA000256.1 TEA030052.1 | 1306.5   | 4916.5   | 1785.667 | 6674.333 | 0.7317 | 0.7366 | 2.7832 | 3.0202 | 1.0851 | 0.9215 | 0.9933 |
| 2 | 30 | TEA000256.1 TEA008343.1 | 1193.167 | 4493.833 | 1619.833 | 6231.167 | 0.7366 | 0.7212 | 3.0185 | 2.4444 | 0.8098 | 1.2349 | 1.0214 |
| 3 | 4  | TEA029086.1 TEA022129.1 | 3412.167 | 12803.83 | 4624     | 17504    | 0.7379 | 0.7315 | 3.0967 | 2.7759 | 0.8964 | 1.1156 | 1.0088 |

|   |    |                         |          |          |          |          |        |        |        |        |        |        |        |
|---|----|-------------------------|----------|----------|----------|----------|--------|--------|--------|--------|--------|--------|--------|
| 3 | 5  | TEA029086.1 TEA019143.1 | 1135.167 | 3995.833 | 1459.833 | 5383.167 | 0.7776 | 0.7423 | nan    | 3.4325 | nan    | nan    | 1.0476 |
| 3 | 6  | TEA029086.1 TEA028452.1 | 1737     | 6424     | 2392.833 | 8812.167 | 0.7259 | 0.729  | 2.5789 | 2.6814 | 1.0397 | 0.9618 | 0.9958 |
| 3 | 7  | TEA029086.1 TEA016969.1 | 3568.167 | 13776.83 | 4903.333 | 18715.67 | 0.7277 | 0.7361 | 2.6367 | 2.9918 | 1.1347 | 0.8813 | 0.9886 |
| 3 | 8  | TEA029086.1 TEA013270.1 | 3462.833 | 13124.17 | 4701.5   | 17873.5  | 0.7365 | 0.7343 | 3.0152 | 2.8989 | 0.9614 | 1.0401 | 1.0031 |
| 3 | 9  | TEA029086.1 TEA026716.1 | 1822.333 | 6594.667 | 2419.667 | 8827.333 | 0.7531 | 0.7471 | nan    | 4.1597 | nan    | nan    | 1.0081 |
| 3 | 10 | TEA029086.1 TEA028758.1 | 1178.667 | 4186.333 | 1561.167 | 5692.833 | 0.755  | 0.7354 | nan    | 2.9527 | nan    | nan    | 1.0267 |
| 3 | 11 | TEA029086.1 TEA010804.1 | 2247.5   | 8250.5   | 3032.833 | 11334.17 | 0.7411 | 0.7279 | 3.3218 | 2.6445 | 0.7961 | 1.2562 | 1.018  |
| 3 | 12 | TEA029086.1 TEA009451.1 | 1485.833 | 5556.167 | 2025.333 | 7496.667 | 0.7336 | 0.7412 | 2.8682 | 3.3299 | 1.161  | 0.8614 | 0.9898 |
| 3 | 13 | TEA029086.1 TEA021421.1 | 1938.5   | 6888.5   | 2550.667 | 9344.333 | 0.76   | 0.7372 | nan    | 3.0521 | nan    | nan    | 1.0309 |
| 3 | 14 | TEA029086.1 TEA017670.1 | 2436.667 | 9181.333 | 3297.667 | 12461.33 | 0.7389 | 0.7368 | 3.1603 | 3.0291 | 0.9585 | 1.0433 | 1.0029 |
| 3 | 15 | TEA029086.1 TEA019184.1 | 1715.667 | 6344.333 | 2342     | 8653     | 0.7326 | 0.7332 | 2.8212 | 2.8488 | 1.0098 | 0.9903 | 0.9991 |
| 3 | 16 | TEA029086.1 TEA000933.1 | 2034.833 | 7547.167 | 2766.333 | 10349.67 | 0.7356 | 0.7292 | 2.9631 | 2.6895 | 0.9077 | 1.1017 | 1.0087 |
| 3 | 17 | TEA029086.1 TEA031230.1 | 1501.167 | 5375.833 | 1992     | 7320     | 0.7536 | 0.7344 | nan    | 2.9048 | nan    | nan    | 1.0261 |
| 3 | 18 | TEA029086.1 TEA022171.1 | 1124.667 | 4013.333 | 1471     | 5363     | 0.7646 | 0.7483 | nan    | 4.5838 | nan    | nan    | 1.0217 |
| 3 | 19 | TEA029086.1 TEA011280.1 | 1078.667 | 3696.333 | 1391.667 | 5016.333 | 0.7751 | 0.7369 | nan    | 3.0333 | nan    | nan    | 1.0519 |
| 3 | 20 | TEA029086.1 TEA031223.1 | 720      | 2441     | 914.5    | 3327.5   | 0.7873 | 0.7336 | nan    | 2.8664 | nan    | nan    | 1.0732 |
| 3 | 21 | TEA029086.1 TEA007232.1 | 1230.833 | 4552.167 | 1700.167 | 6120.833 | 0.7239 | 0.7437 | 2.52   | 3.5866 | 1.4232 | 0.7026 | 0.9734 |
| 3 | 22 | TEA029086.1 TEA016553.1 | 2552.667 | 9318.333 | 3418.833 | 12604.17 | 0.7466 | 0.7393 | 4.058  | 3.1878 | 0.7855 | 1.273  | 1.0099 |
| 3 | 23 | TEA029086.1 TEA033032.1 | 2185.667 | 8311.333 | 3001.833 | 11191.17 | 0.7281 | 0.7427 | 2.6506 | 3.471  | 1.3095 | 0.7636 | 0.9804 |
| 3 | 24 | TEA029086.1 TEA001764.1 | 762.1667 | 2747.833 | 1001.833 | 3660.167 | 0.7608 | 0.7507 | nan    | nan    | nan    | nan    | 1.0134 |
| 3 | 25 | TEA029086.1 TEA026000.1 | 1654.667 | 6115.333 | 2243.667 | 8292.333 | 0.7375 | 0.7375 | 3.0698 | 3.0689 | 0.9997 | 1.0003 | 1      |
| 3 | 26 | TEA029086.1 TEA033556.1 | 552.6667 | 2005.333 | 740.6667 | 2697.333 | 0.7462 | 0.7435 | 3.9588 | 3.5555 | 0.8981 | 1.1134 | 1.0037 |
| 3 | 27 | TEA029086.1 TEA013875.1 | 693.5    | 2522.5   | 944.8333 | 3396.167 | 0.734  | 0.7427 | 2.8852 | 3.4792 | 1.2058 | 0.8293 | 0.9882 |
| 3 | 28 | TEA029086.1 TEA002722.1 | 1773.5   | 6590.5   | 2419.5   | 8923.5   | 0.733  | 0.7386 | 2.8403 | 3.1369 | 1.1044 | 0.9054 | 0.9925 |
| 3 | 29 | TEA029086.1 TEA030052.1 | 1385.833 | 4918.167 | 1834.333 | 6625.667 | 0.7555 | 0.7423 | nan    | 3.4332 | nan    | nan    | 1.0178 |
| 3 | 30 | TEA029086.1 TEA008343.1 | 1278.167 | 4530.833 | 1679     | 6172     | 0.7613 | 0.7341 | nan    | 2.8901 | nan    | nan    | 1.037  |
| 4 | 5  | TEA022129.1 TEA019143.1 | 1006.833 | 3970.167 | 1397     | 5446     | 0.7207 | 0.729  | 2.4321 | 2.6819 | 1.1027 | 0.9069 | 0.9886 |
| 4 | 6  | TEA022129.1 TEA028452.1 | 1687.333 | 6449.667 | 2322.333 | 8882.667 | 0.7266 | 0.7261 | 2.5995 | 2.5845 | 0.9942 | 1.0058 | 1.0007 |
| 4 | 7  | TEA022129.1 TEA016969.1 | 3216.5   | 12888.5  | 4544     | 17635    | 0.7079 | 0.7308 | 2.1592 | 2.7507 | 1.2739 | 0.785  | 0.9685 |
| 4 | 8  | TEA022129.1 TEA013270.1 | 3283.167 | 12831.83 | 4554.167 | 17624.83 | 0.7209 | 0.7281 | 2.4374 | 2.6486 | 1.0866 | 0.9202 | 0.9902 |
| 4 | 9  | TEA022129.1 TEA026716.1 | 1695.167 | 6547.833 | 2349.667 | 8897.333 | 0.7214 | 0.7359 | 2.4513 | 2.9821 | 1.2165 | 0.822  | 0.9803 |
| 4 | 10 | TEA022129.1 TEA028758.1 | 1098.167 | 4268.833 | 1504     | 5750     | 0.7302 | 0.7424 | 2.7244 | 3.4445 | 1.2643 | 0.7909 | 0.9835 |
| 4 | 11 | TEA022129.1 TEA010804.1 | 2049.667 | 8354.333 | 2970.833 | 11396.17 | 0.6899 | 0.7331 | 1.8934 | 2.8438 | 1.5019 | 0.6658 | 0.9411 |

|   |    |                         |          |          |          |          |        |        |        |        |        |        |        |
|---|----|-------------------------|----------|----------|----------|----------|--------|--------|--------|--------|--------|--------|--------|
| 4 | 12 | TEA022129.1 TEA009451.1 | 1410     | 5616     | 1964.667 | 7557.333 | 0.7177 | 0.7431 | 2.3583 | 3.5185 | 1.492  | 0.6702 | 0.9658 |
| 4 | 13 | TEA022129.1 TEA021421.1 | 1795.5   | 6947.5   | 2475.5   | 9419.5   | 0.7253 | 0.7376 | 2.5602 | 3.0747 | 1.201  | 0.8327 | 0.9834 |
| 4 | 14 | TEA022129.1 TEA017670.1 | 2312.167 | 9132.833 | 3239.5   | 12519.5  | 0.7137 | 0.7295 | 2.2721 | 2.6993 | 1.188  | 0.8417 | 0.9784 |
| 4 | 15 | TEA022129.1 TEA019184.1 | 1648.333 | 6355.667 | 2272.5   | 8722.5   | 0.7253 | 0.7287 | 2.5611 | 2.6693 | 1.0422 | 0.9595 | 0.9955 |
| 4 | 16 | TEA022129.1 TEA000933.1 | 1931.333 | 7662.667 | 2697     | 10419    | 0.7161 | 0.7355 | 2.3226 | 2.9569 | 1.273  | 0.7855 | 0.9737 |
| 4 | 17 | TEA022129.1 TEA031230.1 | 1394.833 | 5344.167 | 1927     | 7385     | 0.7238 | 0.7237 | 2.5168 | 2.5115 | 0.9979 | 1.0021 | 1.0003 |
| 4 | 18 | TEA022129.1 TEA022171.1 | 971.6667 | 3935.333 | 1408.167 | 5425.833 | 0.69   | 0.7253 | 1.8946 | 2.5598 | 1.3511 | 0.7401 | 0.9514 |
| 4 | 19 | TEA022129.1 TEA011280.1 | 936.3333 | 3693.667 | 1329.167 | 5078.833 | 0.7045 | 0.7273 | 2.101  | 2.6222 | 1.2481 | 0.8012 | 0.9686 |
| 4 | 20 | TEA022129.1 TEA031223.1 | 623.8333 | 2459.167 | 874.1667 | 3367.833 | 0.7136 | 0.7302 | 2.2698 | 2.7255 | 1.2008 | 0.8328 | 0.9773 |
| 4 | 21 | TEA022129.1 TEA007232.1 | 1182.333 | 4458.667 | 1634.167 | 6186.833 | 0.7235 | 0.7207 | 2.5074 | 2.4311 | 0.9696 | 1.0314 | 1.0039 |
| 4 | 22 | TEA022129.1 TEA016553.1 | 2494     | 9214     | 3367.333 | 12655.67 | 0.7406 | 0.7281 | 3.2882 | 2.6486 | 0.8055 | 1.2415 | 1.0173 |
| 4 | 23 | TEA022129.1 TEA033032.1 | 2093     | 8163     | 2941.833 | 11251.17 | 0.7115 | 0.7255 | 2.2263 | 2.5668 | 1.1529 | 0.8673 | 0.9806 |
| 4 | 24 | TEA022129.1 TEA001764.1 | 689.6667 | 2710.333 | 955.1667 | 3706.833 | 0.722  | 0.7312 | 2.4669 | 2.7636 | 1.1203 | 0.8927 | 0.9875 |
| 4 | 25 | TEA022129.1 TEA026000.1 | 1533.333 | 6209.667 | 2176.167 | 8359.833 | 0.7046 | 0.7428 | 2.1035 | 3.4843 | 1.6564 | 0.6037 | 0.9486 |
| 4 | 26 | TEA022129.1 TEA033556.1 | 524.1667 | 2009.833 | 716.8333 | 2721.167 | 0.7312 | 0.7386 | 2.7657 | 3.1394 | 1.1351 | 0.881  | 0.99   |
| 4 | 27 | TEA022129.1 TEA013875.1 | 679.8333 | 2533.167 | 903.8333 | 3437.167 | 0.7522 | 0.737  | nan    | 3.0409 | nan    | nan    | 1.0206 |
| 4 | 28 | TEA022129.1 TEA002722.1 | 1748.167 | 6639.833 | 2350.667 | 8992.333 | 0.7437 | 0.7384 | 3.5834 | 3.126  | 0.8723 | 1.1463 | 1.0072 |
| 4 | 29 | TEA022129.1 TEA030052.1 | 1312     | 4843     | 1775     | 6685     | 0.7392 | 0.7245 | 3.1773 | 2.5348 | 0.7978 | 1.2535 | 1.0203 |
| 4 | 30 | TEA022129.1 TEA008343.1 | 1149.5   | 4519.5   | 1614     | 6237     | 0.7122 | 0.7246 | 2.2409 | 2.5398 | 1.1334 | 0.8823 | 0.9829 |
| 5 | 6  | TEA019143.1 TEA028452.1 | 1009.333 | 3966.667 | 1395     | 5448     | 0.7235 | 0.7281 | 2.5082 | 2.6501 | 1.0566 | 0.9465 | 0.9937 |
| 5 | 7  | TEA019143.1 TEA016969.1 | 1013.333 | 3980.667 | 1398.167 | 5444.833 | 0.7248 | 0.7311 | 2.5437 | 2.7603 | 1.0851 | 0.9215 | 0.9913 |
| 5 | 8  | TEA019143.1 TEA013270.1 | 1014.5   | 3926.5   | 1408.667 | 5434.333 | 0.7202 | 0.7225 | 2.4188 | 2.4804 | 1.0255 | 0.9752 | 0.9967 |
| 5 | 9  | TEA019143.1 TEA026716.1 | 993.6667 | 3983.333 | 1386.333 | 5456.667 | 0.7168 | 0.73   | 2.3372 | 2.718  | 1.1629 | 0.8599 | 0.9819 |
| 5 | 10 | TEA019143.1 TEA028758.1 | 1028.167 | 3993.833 | 1399.333 | 5443.667 | 0.7348 | 0.7337 | 2.9218 | 2.8701 | 0.9823 | 1.018  | 1.0015 |
| 5 | 11 | TEA019143.1 TEA010804.1 | 978.6667 | 4013.333 | 1394     | 5449     | 0.7021 | 0.7365 | 2.0625 | 3.0145 | 1.4616 | 0.6842 | 0.9532 |
| 5 | 12 | TEA019143.1 TEA009451.1 | 1052.833 | 4026.167 | 1389.667 | 5453.333 | 0.7576 | 0.7383 | nan    | 3.12   | nan    | nan    | 1.0262 |
| 5 | 13 | TEA019143.1 TEA021421.1 | 1020.167 | 3983.833 | 1412     | 5431     | 0.7225 | 0.7335 | 2.4794 | 2.8642 | 1.1552 | 0.8656 | 0.985  |
| 5 | 14 | TEA019143.1 TEA017670.1 | 1025.333 | 4026.667 | 1383     | 5460     | 0.7414 | 0.7375 | 3.3498 | 3.0698 | 0.9164 | 1.0912 | 1.0053 |
| 5 | 15 | TEA019143.1 TEA019184.1 | 1003.333 | 3956.667 | 1391.5   | 5451.5   | 0.721  | 0.7258 | 2.4407 | 2.5751 | 1.0551 | 0.9478 | 0.9935 |
| 5 | 16 | TEA019143.1 TEA000933.1 | 1028.833 | 4048.167 | 1401.333 | 5441.667 | 0.7342 | 0.7439 | 2.8942 | 3.6113 | 1.2478 | 0.8014 | 0.9869 |
| 5 | 17 | TEA019143.1 TEA031230.1 | 994.8333 | 4025.167 | 1397.667 | 5445.333 | 0.7118 | 0.7392 | 2.2326 | 3.1801 | 1.4244 | 0.702  | 0.9629 |
| 5 | 18 | TEA019143.1 TEA022171.1 | 983.5    | 4066.5   | 1388.5   | 5445.5   | 0.7083 | 0.7468 | 2.1675 | 4.0842 | 1.8823 | 0.5307 | 0.9485 |
| 5 | 19 | TEA019143.1 TEA011280.1 | 956.5    | 3711.5   | 1307     | 5101     | 0.7318 | 0.7276 | 2.7902 | 2.6333 | 0.9438 | 1.0596 | 1.0058 |



|      |                         |          |          |          |          |        |        |        |        |        |        |        |
|------|-------------------------|----------|----------|----------|----------|--------|--------|--------|--------|--------|--------|--------|
| 5 20 | TEA019143.1 TEA031223.1 | 637.1667 | 2436.833 | 853      | 3389     | 0.747  | 0.719  | 4.134  | 2.3906 | 0.5783 | 1.7293 | 1.0388 |
| 5 21 | TEA019143.1 TEA007232.1 | 1057     | 3943     | 1411     | 5432     | 0.7491 | 0.7259 | 5.0559 | 2.5779 | 0.5099 | 1.9613 | 1.032  |
| 5 22 | TEA019143.1 TEA016553.1 | 1007.5   | 3979.5   | 1384.5   | 5458.5   | 0.7277 | 0.729  | 2.6366 | 2.6833 | 1.0177 | 0.9826 | 0.9982 |
| 5 23 | TEA019143.1 TEA033032.1 | 994.5    | 3998.5   | 1370.833 | 5472.167 | 0.7255 | 0.7307 | 2.5652 | 2.7449 | 1.07   | 0.9345 | 0.9928 |
| 5 24 | TEA019143.1 TEA001764.1 | 668.5    | 2729.5   | 935.5    | 3726.5   | 0.7146 | 0.7325 | 2.2898 | 2.8166 | 1.2301 | 0.813  | 0.9756 |
| 5 25 | TEA019143.1 TEA026000.1 | 1037.667 | 3971.333 | 1411.333 | 5431.667 | 0.7352 | 0.7311 | 2.946  | 2.7625 | 0.9377 | 1.0665 | 1.0056 |
| 5 26 | TEA019143.1 TEA033556.1 | 527.1667 | 2040.833 | 708.1667 | 2729.833 | 0.7444 | 0.7476 | 3.6744 | 4.3096 | 1.1729 | 0.8526 | 0.9957 |
| 5 27 | TEA019143.1 TEA013875.1 | 651.6667 | 2561.333 | 883.1667 | 3457.833 | 0.7379 | 0.7407 | 3.0936 | 3.2953 | 1.0652 | 0.9388 | 0.9961 |
| 5 28 | TEA019143.1 TEA002722.1 | 1029     | 4021     | 1397     | 5446     | 0.7366 | 0.7383 | 3.0174 | 3.1229 | 1.035  | 0.9662 | 0.9976 |
| 5 29 | TEA019143.1 TEA030052.1 | 1044.167 | 3974.833 | 1415.833 | 5427.167 | 0.7375 | 0.7324 | 3.0703 | 2.8139 | 0.9165 | 1.0911 | 1.007  |
| 5 30 | TEA019143.1 TEA008343.1 | 1008.167 | 3970.833 | 1384.667 | 5458.333 | 0.7281 | 0.7275 | 2.65   | 2.6293 | 0.9923 | 1.0079 | 1.0008 |
| 6 7  | TEA028452.1 TEA016969.1 | 1710.333 | 6485.667 | 2335     | 8870     | 0.7325 | 0.7312 | 2.8174 | 2.7643 | 0.9811 | 1.0192 | 1.0018 |
| 6 8  | TEA028452.1 TEA013270.1 | 1674.167 | 6475.833 | 2332.833 | 8872.167 | 0.7177 | 0.7299 | 2.3577 | 2.7147 | 1.1514 | 0.8685 | 0.9832 |
| 6 9  | TEA028452.1 TEA026716.1 | 1734.333 | 6507.667 | 2354     | 8851     | 0.7368 | 0.7352 | 3.0276 | 2.9464 | 0.9732 | 1.0276 | 1.0021 |
| 6 10 | TEA028452.1 TEA028758.1 | 1095.667 | 4209.333 | 1502.667 | 5751.333 | 0.7291 | 0.7319 | 2.687  | 2.7926 | 1.0393 | 0.9622 | 0.9963 |
| 6 11 | TEA028452.1 TEA010804.1 | 1687.833 | 6458.167 | 2332.5   | 8872.5   | 0.7236 | 0.7279 | 2.5105 | 2.6429 | 1.0527 | 0.9499 | 0.9941 |
| 6 12 | TEA028452.1 TEA009451.1 | 1484.333 | 5559.667 | 1966.5   | 7555.5   | 0.7548 | 0.7358 | nan    | 2.9774 | nan    | nan    | 1.0258 |
| 6 13 | TEA028452.1 TEA021421.1 | 1685.5   | 6561.5   | 2349.667 | 8855.333 | 0.7173 | 0.741  | 2.3503 | 3.3143 | 1.4102 | 0.7092 | 0.9681 |
| 6 14 | TEA028452.1 TEA017670.1 | 1693.5   | 6500.5   | 2311     | 8894     | 0.7328 | 0.7309 | 2.8314 | 2.7522 | 0.972  | 1.0287 | 1.0026 |
| 6 15 | TEA028452.1 TEA019184.1 | 1646.333 | 6336.667 | 2285.5   | 8709.5   | 0.7203 | 0.7276 | 2.4227 | 2.6319 | 1.0863 | 0.9205 | 0.9901 |
| 6 16 | TEA028452.1 TEA000933.1 | 1647.5   | 6569.5   | 2317.667 | 8887.333 | 0.7108 | 0.7392 | 2.2144 | 3.1803 | 1.4362 | 0.6963 | 0.9616 |
| 6 17 | TEA028452.1 TEA031230.1 | 1369.667 | 5423.333 | 1929.333 | 7382.667 | 0.7099 | 0.7346 | 2.1968 | 2.9145 | 1.3267 | 0.7538 | 0.9664 |
| 6 18 | TEA028452.1 TEA022171.1 | 1007.833 | 3955.167 | 1406.167 | 5427.833 | 0.7167 | 0.7287 | 2.3364 | 2.6704 | 1.1429 | 0.8749 | 0.9836 |
| 6 19 | TEA028452.1 TEA011280.1 | 974.3333 | 3680.667 | 1323.5   | 5084.5   | 0.7362 | 0.7239 | 2.9954 | 2.5186 | 0.8408 | 1.1893 | 1.017  |
| 6 20 | TEA028452.1 TEA031223.1 | 655.6667 | 2468.333 | 882.6667 | 3359.333 | 0.7428 | 0.7348 | 3.4871 | 2.9225 | 0.8381 | 1.1932 | 1.011  |
| 6 21 | TEA028452.1 TEA007232.1 | 1179.333 | 4555.667 | 1634.5   | 6186.5   | 0.7215 | 0.7364 | 2.4533 | 3.0069 | 1.2256 | 0.8159 | 0.9798 |
| 6 22 | TEA028452.1 TEA016553.1 | 1689.167 | 6477.833 | 2333.667 | 8871.333 | 0.7238 | 0.7302 | 2.5165 | 2.7257 | 1.0831 | 0.9232 | 0.9913 |
| 6 23 | TEA028452.1 TEA033032.1 | 1669.833 | 6501.167 | 2318     | 8887     | 0.7204 | 0.7315 | 2.4236 | 2.7782 | 1.1463 | 0.8724 | 0.9847 |
| 6 24 | TEA028452.1 TEA001764.1 | 711.5    | 2712.5   | 957.6667 | 3704.333 | 0.743  | 0.7323 | 3.5005 | 2.8078 | 0.8024 | 1.2467 | 1.0146 |
| 6 25 | TEA028452.1 TEA026000.1 | 1516.333 | 6097.667 | 2186     | 8350     | 0.6937 | 0.7303 | 1.9415 | 2.728  | 1.4051 | 0.7117 | 0.9499 |
| 6 26 | TEA028452.1 TEA033556.1 | 521.8333 | 2006.167 | 725      | 2713     | 0.7198 | 0.7395 | 2.4084 | 3.199  | 1.3283 | 0.7529 | 0.9734 |
| 6 27 | TEA028452.1 TEA013875.1 | 676.5    | 2485.5   | 910.5    | 3430.5   | 0.743  | 0.7245 | 3.5054 | 2.5369 | 0.7237 | 1.3818 | 1.0255 |
| 6 28 | TEA028452.1 TEA002722.1 | 1693.167 | 6492.833 | 2336.833 | 8868.167 | 0.7246 | 0.7322 | 2.5377 | 2.8036 | 1.1048 | 0.9052 | 0.9896 |

|      |                         |          |          |          |          |        |        |        |        |        |        |        |
|------|-------------------------|----------|----------|----------|----------|--------|--------|--------|--------|--------|--------|--------|
| 6 29 | TEA028452.1 TEA030052.1 | 1297.833 | 4905.167 | 1772.167 | 6687.833 | 0.7323 | 0.7334 | 2.8117 | 2.8601 | 1.0172 | 0.9831 | 0.9985 |
| 6 30 | TEA028452.1 TEA008343.1 | 1172.833 | 4526.167 | 1613.667 | 6237.333 | 0.7268 | 0.7257 | 2.6073 | 2.5709 | 0.986  | 1.0142 | 1.0016 |
| 7 8  | TEA016969.1 TEA013270.1 | 3293.333 | 13246.67 | 4621.833 | 18004.17 | 0.7126 | 0.7358 | 2.248  | 2.9728 | 1.3224 | 0.7562 | 0.9685 |
| 7 9  | TEA016969.1 TEA026716.1 | 1715.333 | 6605.667 | 2363     | 8884     | 0.7259 | 0.7435 | 2.5788 | 3.5666 | 1.383  | 0.723  | 0.9763 |
| 7 10 | TEA016969.1 TEA028758.1 | 1047.667 | 4273.333 | 1507.667 | 5746.333 | 0.6949 | 0.7437 | 1.9581 | 3.5802 | 1.8284 | 0.5469 | 0.9344 |
| 7 11 | TEA016969.1 TEA010804.1 | 2151.167 | 8349.833 | 2973     | 11394    | 0.7236 | 0.7328 | 2.5091 | 2.8326 | 1.1289 | 0.8858 | 0.9874 |
| 7 12 | TEA016969.1 TEA009451.1 | 1462.167 | 5562.833 | 1972.5   | 7549.5   | 0.7413 | 0.7368 | 3.3405 | 3.0326 | 0.9078 | 1.1015 | 1.006  |
| 7 13 | TEA016969.1 TEA021421.1 | 1736.833 | 6848.167 | 2485.833 | 9409.167 | 0.6987 | 0.7278 | 2.0117 | 2.6406 | 1.3126 | 0.7618 | 0.96   |
| 7 14 | TEA016969.1 TEA017670.1 | 2308.667 | 9051.333 | 3232.333 | 12526.67 | 0.7142 | 0.7226 | 2.2825 | 2.4812 | 1.087  | 0.9199 | 0.9885 |
| 7 15 | TEA016969.1 TEA019184.1 | 1593.833 | 6332.167 | 2285.167 | 8709.833 | 0.6975 | 0.727  | 1.994  | 2.6139 | 1.3109 | 0.7629 | 0.9594 |
| 7 16 | TEA016969.1 TEA000933.1 | 1898     | 7584     | 2692.5   | 10423.5  | 0.7049 | 0.7276 | 2.1087 | 2.6328 | 1.2485 | 0.8009 | 0.9688 |
| 7 17 | TEA016969.1 TEA031230.1 | 1396.5   | 5336.5   | 1939.667 | 7372.333 | 0.72   | 0.7239 | 2.4134 | 2.5173 | 1.043  | 0.9587 | 0.9946 |
| 7 18 | TEA016969.1 TEA022171.1 | 988.3333 | 4029.667 | 1409.667 | 5424.333 | 0.7011 | 0.7429 | 2.0479 | 3.4936 | 1.7059 | 0.5862 | 0.9438 |
| 7 19 | TEA016969.1 TEA011280.1 | 936.3333 | 3677.667 | 1328.5   | 5079.5   | 0.7048 | 0.724  | 2.1068 | 2.5221 | 1.1971 | 0.8353 | 0.9735 |
| 7 20 | TEA016969.1 TEA031223.1 | 610.1667 | 2461.833 | 880.6667 | 3361.333 | 0.6928 | 0.7324 | 1.9307 | 2.814  | 1.4575 | 0.6861 | 0.946  |
| 7 21 | TEA016969.1 TEA007232.1 | 1185.833 | 4538.167 | 1641.333 | 6179.667 | 0.7225 | 0.7344 | 2.4789 | 2.9032 | 1.1712 | 0.8539 | 0.9838 |
| 7 22 | TEA016969.1 TEA016553.1 | 2439.167 | 9273.833 | 3356.5   | 12666.5  | 0.7267 | 0.7322 | 2.6037 | 2.8037 | 1.0768 | 0.9287 | 0.9925 |
| 7 23 | TEA016969.1 TEA033032.1 | 2122.167 | 8235.833 | 2938.667 | 11254.33 | 0.7222 | 0.7318 | 2.47   | 2.7887 | 1.129  | 0.8857 | 0.9868 |
| 7 24 | TEA016969.1 TEA001764.1 | 686.8333 | 2709.167 | 958.8333 | 3703.167 | 0.7163 | 0.7316 | 2.3274 | 2.78   | 1.1945 | 0.8372 | 0.9791 |
| 7 25 | TEA016969.1 TEA026000.1 | 1575     | 6149     | 2187.667 | 8348.333 | 0.7199 | 0.7366 | 2.4128 | 3.0161 | 1.25   | 0.8    | 0.9775 |
| 7 26 | TEA016969.1 TEA033556.1 | 509.6667 | 1968.333 | 722.6667 | 2715.333 | 0.7053 | 0.7249 | 2.1144 | 2.5478 | 1.205  | 0.8299 | 0.9729 |
| 7 27 | TEA016969.1 TEA013875.1 | 664.8333 | 2517.167 | 911.6667 | 3429.333 | 0.7293 | 0.734  | 2.6907 | 2.8861 | 1.0726 | 0.9323 | 0.9935 |
| 7 28 | TEA016969.1 TEA002722.1 | 1721     | 6566     | 2365.833 | 8977.167 | 0.7274 | 0.7314 | 2.6279 | 2.7731 | 1.0552 | 0.9476 | 0.9946 |
| 7 29 | TEA016969.1 TEA030052.1 | 1296.5   | 4867.5   | 1783.5   | 6676.5   | 0.7269 | 0.729  | 2.6115 | 2.6834 | 1.0275 | 0.9732 | 0.9971 |
| 7 30 | TEA016969.1 TEA008343.1 | 1176.667 | 4541.333 | 1621     | 6230     | 0.7259 | 0.7289 | 2.5781 | 2.6797 | 1.0394 | 0.9621 | 0.9958 |
| 8 9  | TEA013270.1 TEA026716.1 | 1679.333 | 6452.667 | 2359.833 | 8887.167 | 0.7116 | 0.7261 | 2.2296 | 2.5836 | 1.1588 | 0.863  | 0.9801 |
| 8 10 | TEA013270.1 TEA028758.1 | 1098     | 4211     | 1512.5   | 5741.5   | 0.726  | 0.7334 | 2.58   | 2.8595 | 1.1083 | 0.9023 | 0.9898 |
| 8 11 | TEA013270.1 TEA010804.1 | 2057.833 | 8390.167 | 2954.667 | 11412.33 | 0.6965 | 0.7352 | 1.9799 | 2.9433 | 1.4866 | 0.6727 | 0.9473 |
| 8 12 | TEA013270.1 TEA009451.1 | 1417.333 | 5575.667 | 1973     | 7549     | 0.7184 | 0.7386 | 2.3743 | 3.1396 | 1.3223 | 0.7563 | 0.9726 |
| 8 13 | TEA013270.1 TEA021421.1 | 1784.167 | 6954.833 | 2480     | 9415     | 0.7194 | 0.7387 | 2.3998 | 3.1463 | 1.3111 | 0.7628 | 0.9739 |
| 8 14 | TEA013270.1 TEA017670.1 | 2337.167 | 9118.833 | 3209.5   | 12549.5  | 0.7282 | 0.7266 | 2.6537 | 2.6014 | 0.9803 | 1.0201 | 1.0022 |
| 8 15 | TEA013270.1 TEA019184.1 | 1635.333 | 6325.667 | 2278.667 | 8716.333 | 0.7177 | 0.7257 | 2.3581 | 2.573  | 1.0911 | 0.9165 | 0.9889 |
| 8 16 | TEA013270.1 TEA000933.1 | 1884.667 | 7605.333 | 2685.5   | 10430.5  | 0.7018 | 0.7291 | 2.0584 | 2.6868 | 1.3053 | 0.7661 | 0.9625 |

|      |                         |          |          |          |          |        |        |        |        |        |        |        |
|------|-------------------------|----------|----------|----------|----------|--------|--------|--------|--------|--------|--------|--------|
| 8 17 | TEA013270.1 TEA031230.1 | 1416.333 | 5400.667 | 1937.833 | 7374.167 | 0.7309 | 0.7324 | 2.7522 | 2.8131 | 1.0221 | 0.9783 | 0.998  |
| 8 18 | TEA013270.1 TEA022171.1 | 1005.5   | 3925.5   | 1419.667 | 5414.333 | 0.7083 | 0.725  | 2.1665 | 2.5515 | 1.1777 | 0.8491 | 0.9769 |
| 8 19 | TEA013270.1 TEA011280.1 | 961.1667 | 3750.833 | 1340.5   | 5067.5   | 0.717  | 0.7402 | 2.3432 | 3.2513 | 1.3875 | 0.7207 | 0.9687 |
| 8 20 | TEA013270.1 TEA031223.1 | 645.5    | 2424.5   | 888.8333 | 3353.167 | 0.7262 | 0.723  | 2.5888 | 2.4945 | 0.9636 | 1.0378 | 1.0044 |
| 8 21 | TEA013270.1 TEA007232.1 | 1174.167 | 4468.833 | 1646.667 | 6174.333 | 0.7131 | 0.7238 | 2.258  | 2.515  | 1.1138 | 0.8978 | 0.9852 |
| 8 22 | TEA013270.1 TEA016553.1 | 2416.833 | 9221.167 | 3337.667 | 12685.33 | 0.7241 | 0.7269 | 2.5246 | 2.6107 | 1.0341 | 0.967  | 0.9961 |
| 8 23 | TEA013270.1 TEA033032.1 | 2104.5   | 8192.5   | 2923.333 | 11269.67 | 0.7199 | 0.727  | 2.4116 | 2.6119 | 1.083  | 0.9233 | 0.9903 |
| 8 24 | TEA013270.1 TEA001764.1 | 686.8333 | 2685.167 | 970.3333 | 3691.667 | 0.7078 | 0.7274 | 2.1588 | 2.6252 | 1.216  | 0.8223 | 0.9732 |
| 8 25 | TEA013270.1 TEA026000.1 | 1591.667 | 6071.333 | 2184.333 | 8351.667 | 0.7287 | 0.727  | 2.6701 | 2.6122 | 0.9783 | 1.0222 | 1.0024 |
| 8 26 | TEA013270.1 TEA033556.1 | 520.6667 | 1990.333 | 730.3333 | 2707.667 | 0.7129 | 0.7351 | 2.2552 | 2.9377 | 1.3026 | 0.7677 | 0.9699 |
| 8 27 | TEA013270.1 TEA013875.1 | 661.1667 | 2472.833 | 918.6667 | 3422.333 | 0.7197 | 0.7226 | 2.4068 | 2.481  | 1.0308 | 0.9701 | 0.996  |
| 8 28 | TEA013270.1 TEA002722.1 | 1717.667 | 6622.333 | 2360.167 | 8982.833 | 0.7278 | 0.7372 | 2.6391 | 3.0542 | 1.1573 | 0.8641 | 0.9872 |
| 8 29 | TEA013270.1 TEA030052.1 | 1348.333 | 4848.667 | 1787     | 6673     | 0.7545 | 0.7266 | nan    | 2.6008 | nan    | nan    | 1.0384 |
| 8 30 | TEA013270.1 TEA008343.1 | 1193.667 | 4543.333 | 1626.167 | 6224.833 | 0.734  | 0.7299 | 2.8874 | 2.7135 | 0.9398 | 1.0641 | 1.0057 |
| 9 10 | TEA026716.1 TEA028758.1 | 1065.5   | 4194.5   | 1493.833 | 5760.167 | 0.7133 | 0.7282 | 2.2623 | 2.6533 | 1.1728 | 0.8526 | 0.9795 |
| 9 11 | TEA026716.1 TEA010804.1 | 1677.667 | 6580.333 | 2361.667 | 8885.333 | 0.7104 | 0.7406 | 2.2054 | 3.2832 | 1.4887 | 0.6717 | 0.9592 |
| 9 12 | TEA026716.1 TEA009451.1 | 1425     | 5479     | 1965     | 7557     | 0.7252 | 0.725  | 2.5566 | 2.5516 | 0.998  | 1.002  | 1.0002 |
| 9 13 | TEA026716.1 TEA021421.1 | 1700.5   | 6562.5   | 2377.333 | 8869.667 | 0.7153 | 0.7399 | 2.3049 | 3.2293 | 1.401  | 0.7138 | 0.9668 |
| 9 14 | TEA026716.1 TEA017670.1 | 1725.333 | 6500.667 | 2338     | 8909     | 0.738  | 0.7297 | 3.0984 | 2.7061 | 0.8734 | 1.145  | 1.0113 |
| 9 15 | TEA026716.1 TEA019184.1 | 1653.833 | 6314.167 | 2303.667 | 8691.333 | 0.7179 | 0.7265 | 2.3637 | 2.597  | 1.0987 | 0.9102 | 0.9882 |
| 9 16 | TEA026716.1 TEA000933.1 | 1710     | 6496     | 2345     | 8902     | 0.7292 | 0.7297 | 2.6892 | 2.708  | 1.007  | 0.9931 | 0.9993 |
| 9 17 | TEA026716.1 TEA031230.1 | 1397     | 5428     | 1930.5   | 7381.5   | 0.7236 | 0.7354 | 2.5114 | 2.9518 | 1.1754 | 0.8508 | 0.9841 |
| 9 18 | TEA026716.1 TEA022171.1 | 994      | 3940     | 1397.5   | 5436.5   | 0.7113 | 0.7247 | 2.2226 | 2.5429 | 1.1441 | 0.8741 | 0.9814 |
| 9 19 | TEA026716.1 TEA011280.1 | 937      | 3653     | 1316.667 | 5091.333 | 0.7116 | 0.7175 | 2.2299 | 2.354  | 1.0556 | 0.9473 | 0.9918 |
| 9 20 | TEA026716.1 TEA031223.1 | 644.8333 | 2466.167 | 862.3333 | 3379.667 | 0.7478 | 0.7297 | 4.366  | 2.7074 | 0.6201 | 1.6127 | 1.0248 |
| 9 21 | TEA026716.1 TEA007232.1 | 1139.167 | 4471.833 | 1626     | 6195     | 0.7006 | 0.7218 | 2.04   | 2.4618 | 1.2068 | 0.8287 | 0.9706 |
| 9 22 | TEA026716.1 TEA016553.1 | 1726.667 | 6464.333 | 2362.667 | 8884.333 | 0.7308 | 0.7276 | 2.7494 | 2.6336 | 0.9579 | 1.044  | 1.0044 |
| 9 23 | TEA026716.1 TEA033032.1 | 1716.5   | 6505.5   | 2345.167 | 8901.833 | 0.7319 | 0.7308 | 2.7944 | 2.749  | 0.9837 | 1.0165 | 1.0015 |
| 9 24 | TEA026716.1 TEA001764.1 | 698      | 2716     | 942      | 3720     | 0.741  | 0.7301 | 3.3152 | 2.7223 | 0.8211 | 1.2178 | 1.0149 |
| 9 25 | TEA026716.1 TEA026000.1 | 1553.167 | 6175.833 | 2195     | 8341     | 0.7076 | 0.7404 | 2.1546 | 3.2702 | 1.5178 | 0.6588 | 0.9557 |
| 9 26 | TEA026716.1 TEA033556.1 | 514.5    | 2004.5   | 709      | 2729     | 0.7257 | 0.7345 | 2.5713 | 2.9103 | 1.1318 | 0.8835 | 0.988  |
| 9 27 | TEA026716.1 TEA013875.1 | 654.3333 | 2547.667 | 890      | 3451     | 0.7352 | 0.7382 | 2.9444 | 3.1165 | 1.0584 | 0.9448 | 0.9959 |
| 9 28 | TEA026716.1 TEA002722.1 | 1739     | 6570     | 2363.333 | 8883.667 | 0.7358 | 0.7396 | 2.9765 | 3.2058 | 1.077  | 0.9285 | 0.995  |

|       |                         |          |          |          |          |        |        |        |        |        |        |        |
|-------|-------------------------|----------|----------|----------|----------|--------|--------|--------|--------|--------|--------|--------|
| 9 29  | TEA026716.1 TEA030052.1 | 1296.5   | 4933.5   | 1762.667 | 6697.333 | 0.7355 | 0.7366 | 2.9612 | 3.0207 | 1.02   | 0.9803 | 0.9985 |
| 9 30  | TEA026716.1 TEA008343.1 | 1142.333 | 4546.667 | 1605.667 | 6245.333 | 0.7114 | 0.728  | 2.2259 | 2.6471 | 1.1892 | 0.8409 | 0.9772 |
| 10 11 | TEA028758.1 TEA010804.1 | 1097.5   | 4235.5   | 1502.667 | 5751.333 | 0.7304 | 0.7364 | 2.7322 | 3.0096 | 1.1015 | 0.9078 | 0.9918 |
| 10 12 | TEA028758.1 TEA009451.1 | 1076.833 | 4293.167 | 1495.5   | 5758.5   | 0.72   | 0.7455 | 2.4154 | 3.843  | 1.591  | 0.6285 | 0.9658 |
| 10 13 | TEA028758.1 TEA021421.1 | 1092     | 4328     | 1518.333 | 5735.667 | 0.7192 | 0.7546 | 2.3947 | nan    | nan    | nan    | 0.9531 |
| 10 14 | TEA028758.1 TEA017670.1 | 1049.5   | 4271.5   | 1483.333 | 5770.667 | 0.7075 | 0.7402 | 2.1534 | 3.254  | 1.5111 | 0.6618 | 0.9558 |
| 10 15 | TEA028758.1 TEA019184.1 | 1031     | 4220     | 1501     | 5753     | 0.6869 | 0.7335 | 1.8562 | 2.8639 | 1.5429 | 0.6481 | 0.9364 |
| 10 16 | TEA028758.1 TEA000933.1 | 1113.667 | 4214.333 | 1508.667 | 5745.333 | 0.7382 | 0.7335 | 3.1127 | 2.8636 | 0.92   | 1.087  | 1.0063 |
| 10 17 | TEA028758.1 TEA031230.1 | 1070.833 | 4227.167 | 1505.167 | 5748.833 | 0.7114 | 0.7353 | 2.2259 | 2.9496 | 1.3251 | 0.7546 | 0.9675 |
| 10 18 | TEA028758.1 TEA022171.1 | 975.1667 | 4002.833 | 1410.5   | 5423.5   | 0.6914 | 0.7381 | 1.9115 | 3.1047 | 1.6242 | 0.6157 | 0.9367 |
| 10 19 | TEA028758.1 TEA011280.1 | 959.5    | 3738.5   | 1326.167 | 5081.833 | 0.7235 | 0.7357 | 2.5076 | 2.9677 | 1.1835 | 0.8449 | 0.9835 |
| 10 20 | TEA028758.1 TEA031223.1 | 623.6667 | 2487.333 | 874.3333 | 3367.667 | 0.7133 | 0.7386 | 2.2631 | 3.1394 | 1.3872 | 0.7209 | 0.9658 |
| 10 21 | TEA028758.1 TEA007232.1 | 1061.5   | 4207.5   | 1520.167 | 5733.833 | 0.6983 | 0.7338 | 2.0057 | 2.8764 | 1.4341 | 0.6973 | 0.9516 |
| 10 22 | TEA028758.1 TEA016553.1 | 1078.167 | 4215.833 | 1487.167 | 5766.833 | 0.725  | 0.731  | 2.5503 | 2.7586 | 1.0817 | 0.9245 | 0.9917 |
| 10 23 | TEA028758.1 TEA033032.1 | 1044.167 | 4201.833 | 1475.333 | 5778.667 | 0.7077 | 0.7271 | 2.1573 | 2.6176 | 1.2134 | 0.8242 | 0.9733 |
| 10 24 | TEA028758.1 TEA001764.1 | 665.6667 | 2704.333 | 951.3333 | 3710.667 | 0.6997 | 0.7288 | 2.0268 | 2.6745 | 1.3156 | 0.7578 | 0.9601 |
| 10 25 | TEA028758.1 TEA026000.1 | 1085.333 | 4157.667 | 1518.333 | 5735.667 | 0.7148 | 0.7249 | 2.2947 | 2.5473 | 1.1101 | 0.9008 | 0.9861 |
| 10 26 | TEA028758.1 TEA033556.1 | 518.5    | 1985.5   | 721.3333 | 2716.667 | 0.7188 | 0.7309 | 2.3849 | 2.7512 | 1.1537 | 0.8669 | 0.9835 |
| 10 27 | TEA028758.1 TEA013875.1 | 661      | 2562     | 902.5    | 3438.5   | 0.7324 | 0.7451 | 2.8146 | 3.772  | 1.3401 | 0.7462 | 0.983  |
| 10 28 | TEA028758.1 TEA002722.1 | 1086.167 | 4244.833 | 1505.5   | 5748.5   | 0.7215 | 0.7384 | 2.4517 | 3.1284 | 1.276  | 0.7837 | 0.977  |
| 10 29 | TEA028758.1 TEA030052.1 | 1110     | 4213     | 1524.667 | 5729.333 | 0.728  | 0.7353 | 2.6477 | 2.9511 | 1.1146 | 0.8972 | 0.9901 |
| 10 30 | TEA028758.1 TEA008343.1 | 1053.167 | 4212.833 | 1492.667 | 5761.333 | 0.7056 | 0.7312 | 2.1195 | 2.7657 | 1.3049 | 0.7663 | 0.9649 |
| 11 12 | TEA010804.1 TEA009451.1 | 1402     | 5531     | 1961.167 | 7560.833 | 0.7149 | 0.7315 | 2.296  | 2.7781 | 1.21   | 0.8265 | 0.9772 |
| 11 13 | TEA010804.1 TEA021421.1 | 1809.667 | 6902.333 | 2493.333 | 9401.667 | 0.7258 | 0.7342 | 2.5754 | 2.8932 | 1.1234 | 0.8901 | 0.9886 |
| 11 14 | TEA010804.1 TEA017670.1 | 2083.5   | 8296.5   | 2955.667 | 11411.33 | 0.7049 | 0.727  | 2.1087 | 2.6148 | 1.24   | 0.8065 | 0.9696 |
| 11 15 | TEA010804.1 TEA019184.1 | 1647.333 | 6341.667 | 2280.5   | 8714.5   | 0.7224 | 0.7277 | 2.4755 | 2.6371 | 1.0653 | 0.9387 | 0.9926 |
| 11 16 | TEA010804.1 TEA000933.1 | 1950.167 | 7561.833 | 2707.333 | 10408.67 | 0.7203 | 0.7265 | 2.4224 | 2.5971 | 1.0721 | 0.9327 | 0.9915 |
| 11 17 | TEA010804.1 TEA031230.1 | 1368     | 5297     | 1922.5   | 7389.5   | 0.7116 | 0.7168 | 2.2285 | 2.3388 | 1.0495 | 0.9528 | 0.9927 |
| 11 18 | TEA010804.1 TEA022171.1 | 1000.833 | 3975.167 | 1405.667 | 5428.333 | 0.712  | 0.7323 | 2.2368 | 2.8099 | 1.2575 | 0.7961 | 0.9723 |
| 11 19 | TEA010804.1 TEA011280.1 | 943.8333 | 3793.167 | 1325.833 | 5082.167 | 0.7119 | 0.7464 | 2.2345 | 3.9977 | 1.7891 | 0.5589 | 0.9538 |
| 11 20 | TEA010804.1 TEA031223.1 | 638.6667 | 2522.333 | 877.6667 | 3364.333 | 0.7277 | 0.7497 | 2.6362 | 5.9402 | 2.2533 | 0.4438 | 0.9706 |
| 11 21 | TEA010804.1 TEA007232.1 | 1147.833 | 4536.167 | 1630.5   | 6190.5   | 0.704  | 0.7328 | 2.0932 | 2.8297 | 1.3518 | 0.7397 | 0.9607 |
| 11 22 | TEA010804.1 TEA016553.1 | 2172.333 | 8358.667 | 3026.5   | 11340.5  | 0.7178 | 0.7371 | 2.3604 | 3.045  | 1.26   | 0.7752 | 0.9738 |

|    |    |                         |          |          |          |          |        |        |        |        |        |        |        |
|----|----|-------------------------|----------|----------|----------|----------|--------|--------|--------|--------|--------|--------|--------|
| 11 | 23 | TEA010804.1 TEA033032.1 | 2111.833 | 8242.167 | 2948     | 11245    | 0.7164 | 0.733  | 2.3283 | 2.8385 | 1.2191 | 0.8203 | 0.9774 |
| 11 | 24 | TEA010804.1 TEA001764.1 | 677      | 2682     | 959.6667 | 3702.333 | 0.7055 | 0.7244 | 2.1177 | 2.5333 | 1.1962 | 0.8359 | 0.9738 |
| 11 | 25 | TEA010804.1 TEA026000.1 | 1537.167 | 6166.833 | 2177.167 | 8358.833 | 0.706  | 0.7378 | 2.1276 | 3.0867 | 1.4508 | 0.6893 | 0.957  |
| 11 | 26 | TEA010804.1 TEA033556.1 | 486.1667 | 2001.833 | 715.1667 | 2722.833 | 0.6798 | 0.7352 | 1.7765 | 2.9442 | 1.6573 | 0.6034 | 0.9246 |
| 11 | 27 | TEA010804.1 TEA013875.1 | 668.3333 | 2496.667 | 909.5    | 3431.5   | 0.7348 | 0.7276 | 2.9259 | 2.6324 | 0.8997 | 1.1115 | 1.01   |
| 11 | 28 | TEA010804.1 TEA002722.1 | 1722.167 | 6582.833 | 2365.167 | 8977.833 | 0.7281 | 0.7332 | 2.6515 | 2.8504 | 1.075  | 0.9302 | 0.9931 |
| 11 | 29 | TEA010804.1 TEA030052.1 | 1304     | 4943     | 1768.5   | 6691.5   | 0.7373 | 0.7387 | 3.0617 | 3.1463 | 1.0276 | 0.9731 | 0.9982 |
| 11 | 30 | TEA010804.1 TEA008343.1 | 1164     | 4609     | 1610     | 6241     | 0.723  | 0.7385 | 2.4927 | 3.1335 | 1.2517 | 0.7955 | 0.979  |
| 12 | 13 | TEA009451.1 TEA021421.1 | 1472     | 5555     | 1984.167 | 7537.833 | 0.7419 | 0.7369 | 3.3937 | 3.0384 | 0.8953 | 1.1169 | 1.0067 |
| 12 | 14 | TEA009451.1 TEA017670.1 | 1398.333 | 5598.667 | 1943     | 7579     | 0.7197 | 0.7387 | 2.4061 | 3.147  | 1.3079 | 0.7646 | 0.9742 |
| 12 | 15 | TEA009451.1 TEA019184.1 | 1403.167 | 5565.833 | 1965.5   | 7556.5   | 0.7139 | 0.7366 | 2.2753 | 3.0165 | 1.3257 | 0.7543 | 0.9692 |
| 12 | 16 | TEA009451.1 TEA000933.1 | 1437.5   | 5587.5   | 1966.833 | 7555.167 | 0.7309 | 0.7396 | 2.7516 | 3.2058 | 1.1651 | 0.8583 | 0.9882 |
| 12 | 17 | TEA009451.1 TEA031230.1 | 1361.5   | 5467.5   | 1924.167 | 7387.833 | 0.7076 | 0.7401 | 2.1543 | 3.2432 | 1.5054 | 0.6642 | 0.9561 |
| 12 | 18 | TEA009451.1 TEA022171.1 | 986.6667 | 3993.333 | 1400.333 | 5433.667 | 0.7046 | 0.7349 | 2.1033 | 2.9302 | 1.3931 | 0.7178 | 0.9587 |
| 12 | 19 | TEA009451.1 TEA011280.1 | 985.6667 | 3785.333 | 1316.833 | 5091.167 | 0.7485 | 0.7435 | 4.6674 | 3.5624 | 0.7632 | 1.3102 | 1.0067 |
| 12 | 20 | TEA009451.1 TEA031223.1 | 603.6667 | 2515.333 | 861.6667 | 3380.333 | 0.7006 | 0.7441 | 2.0398 | 3.6349 | 1.782  | 0.5612 | 0.9415 |
| 12 | 21 | TEA009451.1 TEA007232.1 | 1183.5   | 4577.5   | 1629.333 | 6191.667 | 0.7264 | 0.7393 | 2.5932 | 3.1874 | 1.2291 | 0.8136 | 0.9825 |
| 12 | 22 | TEA009451.1 TEA016553.1 | 1408.167 | 5542.833 | 1950.333 | 7571.667 | 0.722  | 0.732  | 2.4663 | 2.7993 | 1.135  | 0.881  | 0.9863 |
| 12 | 23 | TEA009451.1 TEA033032.1 | 1419.167 | 5532.833 | 1945.5   | 7576.5   | 0.7295 | 0.7303 | 2.6983 | 2.7282 | 1.0111 | 0.9891 | 0.9989 |
| 12 | 24 | TEA009451.1 TEA001764.1 | 705.6667 | 2729.333 | 944.1667 | 3717.833 | 0.7474 | 0.7341 | 4.2474 | 2.8912 | 0.6807 | 1.469  | 1.0181 |
| 12 | 25 | TEA009451.1 TEA026000.1 | 1449.667 | 5585.333 | 1968.333 | 7553.667 | 0.7365 | 0.7394 | 3.0127 | 3.1958 | 1.0608 | 0.9427 | 0.996  |
| 12 | 26 | TEA009451.1 TEA033556.1 | 518      | 2028     | 704.8333 | 2733.167 | 0.7349 | 0.742  | 2.9303 | 3.4051 | 1.162  | 0.8606 | 0.9905 |
| 12 | 27 | TEA009451.1 TEA013875.1 | 652.6667 | 2527.333 | 892.3333 | 3448.667 | 0.7314 | 0.7328 | 2.7733 | 2.8333 | 1.0216 | 0.9788 | 0.9981 |
| 12 | 28 | TEA009451.1 TEA002722.1 | 1419.333 | 5539.667 | 1977     | 7545     | 0.7179 | 0.7342 | 2.3639 | 2.8959 | 1.225  | 0.8163 | 0.9778 |
| 12 | 29 | TEA009451.1 TEA030052.1 | 1334.167 | 4874.833 | 1767.333 | 6692.667 | 0.7549 | 0.7284 | nan    | 2.66   | nan    | nan    | 1.0364 |
| 12 | 30 | TEA009451.1 TEA008343.1 | 1152.167 | 4563.833 | 1609.5   | 6241.5   | 0.7159 | 0.7312 | 2.3171 | 2.765  | 1.1933 | 0.838  | 0.979  |
| 13 | 14 | TEA021421.1 TEA017670.1 | 1793.5   | 6838.5   | 2463.667 | 9431.333 | 0.728  | 0.7251 | 2.6461 | 2.5534 | 0.965  | 1.0363 | 1.004  |
| 13 | 15 | TEA021421.1 TEA019184.1 | 1619     | 6431     | 2298.5   | 8696.5   | 0.7044 | 0.7395 | 2.0997 | 3.201  | 1.5245 | 0.6559 | 0.9525 |
| 13 | 16 | TEA021421.1 TEA000933.1 | 1738.667 | 6904.333 | 2471.5   | 9423.5   | 0.7035 | 0.7327 | 2.0852 | 2.8258 | 1.3552 | 0.7379 | 0.9602 |
| 13 | 17 | TEA021421.1 TEA031230.1 | 1361.667 | 5443.333 | 1951.167 | 7360.833 | 0.6979 | 0.7395 | 1.9998 | 3.2015 | 1.6009 | 0.6246 | 0.9437 |
| 13 | 18 | TEA021421.1 TEA022171.1 | 980.6667 | 3945.333 | 1422.667 | 5411.333 | 0.6893 | 0.7291 | 1.8858 | 2.6848 | 1.4237 | 0.7024 | 0.9455 |
| 13 | 19 | TEA021421.1 TEA011280.1 | 917.8333 | 3735.167 | 1334.667 | 5073.333 | 0.6877 | 0.7362 | 1.8659 | 2.9985 | 1.607  | 0.6223 | 0.9341 |
| 13 | 20 | TEA021421.1 TEA031223.1 | 636.5    | 2457.5   | 875.5    | 3366.5   | 0.727  | 0.73   | 2.6139 | 2.7178 | 1.0397 | 0.9618 | 0.9959 |

|    |    |                         |          |          |          |          |        |        |        |        |        |        |        |
|----|----|-------------------------|----------|----------|----------|----------|--------|--------|--------|--------|--------|--------|--------|
| 13 | 21 | TEA021421.1 TEA007232.1 | 1197.333 | 4534.667 | 1650.833 | 6170.167 | 0.7253 | 0.7349 | 2.5597 | 2.9307 | 1.1449 | 0.8734 | 0.9869 |
| 13 | 22 | TEA021421.1 TEA016553.1 | 1805     | 6874     | 2507.5   | 9387.5   | 0.7198 | 0.7323 | 2.4102 | 2.8078 | 1.1653 | 0.8584 | 0.9831 |
| 13 | 23 | TEA021421.1 TEA033032.1 | 1744.5   | 6913.5   | 2476.333 | 9418.667 | 0.7045 | 0.734  | 2.1013 | 2.8866 | 1.3737 | 0.7279 | 0.9597 |
| 13 | 24 | TEA021421.1 TEA001764.1 | 671.6667 | 2703.333 | 959.3333 | 3702.667 | 0.7001 | 0.7301 | 2.0331 | 2.7222 | 1.3389 | 0.7469 | 0.959  |
| 13 | 25 | TEA021421.1 TEA026000.1 | 1556.667 | 6131.333 | 2199.5   | 8336.5   | 0.7077 | 0.7355 | 2.1571 | 2.9584 | 1.3715 | 0.7291 | 0.9623 |
| 13 | 26 | TEA021421.1 TEA033556.1 | 500      | 2020     | 718.3333 | 2719.667 | 0.6961 | 0.7427 | 1.9741 | 3.4781 | 1.7619 | 0.5676 | 0.9371 |
| 13 | 27 | TEA021421.1 TEA013875.1 | 635      | 2563     | 905.8333 | 3435.167 | 0.701  | 0.7461 | 2.0464 | 3.9456 | 1.9281 | 0.5187 | 0.9396 |
| 13 | 28 | TEA021421.1 TEA002722.1 | 1719.5   | 6633.5   | 2377.167 | 8965.833 | 0.7233 | 0.7399 | 2.5027 | 3.228  | 1.2898 | 0.7753 | 0.9777 |
| 13 | 29 | TEA021421.1 TEA030052.1 | 1288.333 | 4961.667 | 1794.5   | 6665.5   | 0.7179 | 0.7444 | 2.3642 | 3.6703 | 1.5524 | 0.6441 | 0.9645 |
| 13 | 30 | TEA021421.1 TEA008343.1 | 1125.167 | 4596.833 | 1630.833 | 6220.167 | 0.6899 | 0.739  | 1.8935 | 3.1681 | 1.6731 | 0.5977 | 0.9336 |
| 14 | 15 | TEA017670.1 TEA019184.1 | 1598.333 | 6409.667 | 2261.167 | 8733.833 | 0.7069 | 0.7339 | 2.1418 | 2.8804 | 1.3448 | 0.7436 | 0.9632 |
| 14 | 16 | TEA017670.1 TEA000933.1 | 1910.167 | 7575.833 | 2672.667 | 10443.33 | 0.7147 | 0.7254 | 2.2922 | 2.5637 | 1.1184 | 0.8941 | 0.9852 |
| 14 | 17 | TEA017670.1 TEA031230.1 | 1386.167 | 5399.833 | 1906.5   | 7405.5   | 0.7271 | 0.7292 | 2.6159 | 2.6876 | 1.0274 | 0.9733 | 0.9971 |
| 14 | 18 | TEA017670.1 TEA022171.1 | 988.6667 | 3920.333 | 1394.333 | 5439.667 | 0.7091 | 0.7207 | 2.181  | 2.4317 | 1.1149 | 0.8969 | 0.9839 |
| 14 | 19 | TEA017670.1 TEA011280.1 | 929.1667 | 3724.833 | 1312.333 | 5095.667 | 0.708  | 0.731  | 2.1623 | 2.756  | 1.2746 | 0.7846 | 0.9686 |
| 14 | 20 | TEA017670.1 TEA031223.1 | 615.3333 | 2468.667 | 862      | 3380     | 0.7138 | 0.7304 | 2.2742 | 2.7324 | 1.2015 | 0.8323 | 0.9774 |
| 14 | 21 | TEA017670.1 TEA007232.1 | 1132.667 | 4521.333 | 1615.167 | 6205.833 | 0.7013 | 0.7286 | 2.0503 | 2.6662 | 1.3004 | 0.769  | 0.9625 |
| 14 | 22 | TEA017670.1 TEA016553.1 | 2426     | 9044     | 3304.5   | 12454.5  | 0.7342 | 0.7262 | 2.8927 | 2.5866 | 0.8942 | 1.1183 | 1.011  |
| 14 | 23 | TEA017670.1 TEA033032.1 | 2155.167 | 8208.833 | 2924.167 | 11268.83 | 0.737  | 0.7285 | 3.0424 | 2.6624 | 0.8751 | 1.1427 | 1.0118 |
| 14 | 24 | TEA017670.1 TEA001764.1 | 693.8333 | 2734.167 | 941.8333 | 3720.167 | 0.7367 | 0.735  | 3.0233 | 2.9319 | 0.9698 | 1.0312 | 1.0023 |
| 14 | 25 | TEA017670.1 TEA026000.1 | 1520.167 | 6115.833 | 2160.5   | 8375.5   | 0.7036 | 0.7302 | 2.0874 | 2.726  | 1.3059 | 0.7657 | 0.9636 |
| 14 | 26 | TEA017670.1 TEA033556.1 | 520      | 1966     | 713      | 2725     | 0.7293 | 0.7215 | 2.6929 | 2.4518 | 0.9105 | 1.0984 | 1.0109 |
| 14 | 27 | TEA017670.1 TEA013875.1 | 635.8333 | 2492.167 | 890.8333 | 3450.167 | 0.7138 | 0.7223 | 2.2722 | 2.4749 | 1.0892 | 0.9181 | 0.9881 |
| 14 | 28 | TEA017670.1 TEA002722.1 | 1686.167 | 6574.833 | 2338     | 9005     | 0.7212 | 0.7301 | 2.4448 | 2.7232 | 1.1139 | 0.8978 | 0.9878 |
| 14 | 29 | TEA017670.1 TEA030052.1 | 1294.833 | 4957.167 | 1755.5   | 6704.5   | 0.7376 | 0.7394 | 3.076  | 3.1929 | 1.038  | 0.9634 | 0.9976 |
| 14 | 30 | TEA017670.1 TEA008343.1 | 1159.5   | 4490.5   | 1595     | 6256     | 0.727  | 0.7178 | 2.6121 | 2.3609 | 0.9038 | 1.1064 | 1.0128 |
| 15 | 16 | TEA019184.1 TEA000933.1 | 1631     | 6373     | 2268.5   | 8726.5   | 0.719  | 0.7303 | 2.389  | 2.7298 | 1.1426 | 0.8752 | 0.9845 |
| 15 | 17 | TEA019184.1 TEA031230.1 | 1377.833 | 5335.167 | 1931     | 7381     | 0.7135 | 0.7228 | 2.2678 | 2.4883 | 1.0972 | 0.9114 | 0.9871 |
| 15 | 18 | TEA019184.1 TEA022171.1 | 981.3333 | 3882.667 | 1402.667 | 5431.333 | 0.6996 | 0.7149 | 2.0254 | 2.2956 | 1.1334 | 0.8823 | 0.9787 |
| 15 | 19 | TEA019184.1 TEA011280.1 | 918.6667 | 3669.333 | 1323.5   | 5084.5   | 0.6941 | 0.7217 | 1.9476 | 2.4571 | 1.2616 | 0.7926 | 0.9618 |
| 15 | 20 | TEA019184.1 TEA031223.1 | 604.1667 | 2475.833 | 869.5    | 3372.5   | 0.6948 | 0.7341 | 1.9574 | 2.8915 | 1.4772 | 0.677  | 0.9465 |
| 15 | 21 | TEA019184.1 TEA007232.1 | 1158.667 | 4483.333 | 1630.833 | 6190.167 | 0.7105 | 0.7243 | 2.2074 | 2.5292 | 1.1459 | 0.8727 | 0.981  |
| 15 | 22 | TEA019184.1 TEA016553.1 | 1620.833 | 6418.167 | 2279.667 | 8715.333 | 0.711  | 0.7364 | 2.2173 | 3.0087 | 1.3569 | 0.737  | 0.9655 |

|       |                         |          |          |          |          |        |        |        |        |        |        |        |
|-------|-------------------------|----------|----------|----------|----------|--------|--------|--------|--------|--------|--------|--------|
| 15 23 | TEA019184.1 TEA033032.1 | 1591.167 | 6314.833 | 2268.667 | 8726.333 | 0.7014 | 0.7237 | 2.0518 | 2.5115 | 1.224  | 0.817  | 0.9692 |
| 15 24 | TEA019184.1 TEA001764.1 | 667.1667 | 2708.833 | 948.6667 | 3713.333 | 0.7033 | 0.7295 | 2.0817 | 2.6993 | 1.2967 | 0.7712 | 0.9641 |
| 15 25 | TEA019184.1 TEA026000.1 | 1557     | 6086     | 2184.833 | 8351.167 | 0.7126 | 0.7288 | 2.2496 | 2.6732 | 1.1883 | 0.8416 | 0.9779 |
| 15 26 | TEA019184.1 TEA033556.1 | 495.1667 | 2025.833 | 716.1667 | 2721.833 | 0.6914 | 0.7443 | 1.9122 | 3.6584 | 1.9132 | 0.5227 | 0.929  |
| 15 27 | TEA019184.1 TEA013875.1 | 651.1667 | 2485.833 | 898.5    | 3442.5   | 0.7247 | 0.7221 | 2.5427 | 2.4686 | 0.9708 | 1.03   | 1.0036 |
| 15 28 | TEA019184.1 TEA002722.1 | 1636     | 6359     | 2287.5   | 8707.5   | 0.7152 | 0.7303 | 2.3027 | 2.7292 | 1.1852 | 0.8437 | 0.9793 |
| 15 29 | TEA019184.1 TEA030052.1 | 1292.167 | 4871.833 | 1772     | 6688     | 0.7292 | 0.7284 | 2.6893 | 2.6621 | 0.9899 | 1.0102 | 1.0011 |
| 15 30 | TEA019184.1 TEA008343.1 | 1115.667 | 4525.333 | 1611.333 | 6239.667 | 0.6924 | 0.7253 | 1.9247 | 2.5585 | 1.3293 | 0.7523 | 0.9547 |
| 16 17 | TEA000933.1 TEA031230.1 | 1369     | 5368     | 1930     | 7382     | 0.7093 | 0.7272 | 2.1859 | 2.6191 | 1.1982 | 0.8346 | 0.9755 |
| 16 18 | TEA000933.1 TEA022171.1 | 990.3333 | 3912.667 | 1412.5   | 5421.5   | 0.7011 | 0.7217 | 2.048  | 2.4578 | 1.2001 | 0.8333 | 0.9715 |
| 16 19 | TEA000933.1 TEA011280.1 | 977.3333 | 3657.667 | 1336.833 | 5071.167 | 0.7311 | 0.7213 | 2.7599 | 2.4465 | 0.8864 | 1.1281 | 1.0136 |
| 16 20 | TEA000933.1 TEA031223.1 | 620.3333 | 2438.667 | 880.3333 | 3361.667 | 0.7047 | 0.7254 | 2.1044 | 2.564  | 1.2184 | 0.8207 | 0.9714 |
| 16 21 | TEA000933.1 TEA007232.1 | 1132     | 4536     | 1641.833 | 6179.167 | 0.6895 | 0.7341 | 1.8877 | 2.8894 | 1.5306 | 0.6533 | 0.9392 |
| 16 22 | TEA000933.1 TEA016553.1 | 1963.167 | 7558.833 | 2740.5   | 10375.5  | 0.7164 | 0.7285 | 2.3281 | 2.665  | 1.1447 | 0.8736 | 0.9833 |
| 16 23 | TEA000933.1 TEA033032.1 | 1906.5   | 7547.5   | 2694.5   | 10421.5  | 0.7076 | 0.7242 | 2.1539 | 2.528  | 1.1737 | 0.852  | 0.977  |
| 16 24 | TEA000933.1 TEA001764.1 | 698.6667 | 2702.333 | 962      | 3700     | 0.7263 | 0.7304 | 2.5898 | 2.7319 | 1.0549 | 0.948  | 0.9944 |
| 16 25 | TEA000933.1 TEA026000.1 | 1534.333 | 6135.667 | 2178.5   | 8357.5   | 0.7043 | 0.7342 | 2.0986 | 2.8927 | 1.3784 | 0.7255 | 0.9593 |
| 16 26 | TEA000933.1 TEA033556.1 | 527.6667 | 2011.333 | 723.3333 | 2714.667 | 0.7295 | 0.7409 | 2.6995 | 3.31   | 1.2261 | 0.8156 | 0.9846 |
| 16 27 | TEA000933.1 TEA013875.1 | 654      | 2501     | 910      | 3431     | 0.7187 | 0.7289 | 2.3819 | 2.6796 | 1.1249 | 0.8889 | 0.9859 |
| 16 28 | TEA000933.1 TEA002722.1 | 1698.167 | 6586.833 | 2345.167 | 8997.833 | 0.7241 | 0.732  | 2.5248 | 2.7992 | 1.1087 | 0.902  | 0.9892 |
| 16 29 | TEA000933.1 TEA030052.1 | 1292     | 4858     | 1777     | 6683     | 0.7271 | 0.7269 | 2.6157 | 2.6108 | 0.9981 | 1.0019 | 1.0002 |
| 16 30 | TEA000933.1 TEA008343.1 | 1205     | 4549     | 1621.167 | 6229.833 | 0.7433 | 0.7302 | 3.5376 | 2.7256 | 0.7705 | 1.2979 | 1.0179 |
| 17 18 | TEA031230.1 TEA022171.1 | 989.8333 | 3969.167 | 1408.833 | 5425.167 | 0.7026 | 0.7316 | 2.0709 | 2.7817 | 1.3432 | 0.7445 | 0.9603 |
| 17 19 | TEA031230.1 TEA011280.1 | 929.3333 | 3682.667 | 1331     | 5077     | 0.6982 | 0.7254 | 2.0048 | 2.5619 | 1.2779 | 0.7826 | 0.9626 |
| 17 20 | TEA031230.1 TEA031223.1 | 585      | 2406     | 873.1667 | 3368.833 | 0.67   | 0.7142 | 1.6783 | 2.2815 | 1.3594 | 0.7356 | 0.9381 |
| 17 21 | TEA031230.1 TEA007232.1 | 1162.167 | 4480.833 | 1639     | 6182     | 0.7091 | 0.7248 | 2.1812 | 2.5455 | 1.167  | 0.8569 | 0.9783 |
| 17 22 | TEA031230.1 TEA016553.1 | 1356.167 | 5434.833 | 1911.667 | 7400.333 | 0.7094 | 0.7344 | 2.1875 | 2.9048 | 1.3279 | 0.7531 | 0.966  |
| 17 23 | TEA031230.1 TEA033032.1 | 1379.5   | 5367.5   | 1910.167 | 7401.833 | 0.7222 | 0.7252 | 2.471  | 2.5557 | 1.0343 | 0.9669 | 0.9959 |
| 17 24 | TEA031230.1 TEA001764.1 | 688      | 2672     | 955.1667 | 3706.833 | 0.7203 | 0.7208 | 2.4215 | 2.4352 | 1.0056 | 0.9944 | 0.9993 |
| 17 25 | TEA031230.1 TEA026000.1 | 1376.167 | 5483.833 | 1934.333 | 7377.667 | 0.7114 | 0.7433 | 2.2259 | 3.5387 | 1.5898 | 0.629  | 0.9571 |
| 17 26 | TEA031230.1 TEA033556.1 | 503.1667 | 1997.833 | 719.5    | 2718.5   | 0.6993 | 0.7349 | 2.021  | 2.9292 | 1.4494 | 0.69   | 0.9516 |
| 17 27 | TEA031230.1 TEA013875.1 | 632.6667 | 2490.333 | 904.1667 | 3436.833 | 0.6997 | 0.7246 | 2.0269 | 2.539  | 1.2526 | 0.7983 | 0.9657 |
| 17 28 | TEA031230.1 TEA002722.1 | 1451     | 5361     | 1941     | 7371     | 0.7476 | 0.7273 | 4.2938 | 2.6236 | 0.611  | 1.6366 | 1.0278 |

|       |                         |          |          |          |          |        |        |        |        |        |        |        |
|-------|-------------------------|----------|----------|----------|----------|--------|--------|--------|--------|--------|--------|--------|
| 17 29 | TEA031230.1 TEA030052.1 | 1327.5   | 4866.5   | 1777     | 6683     | 0.747  | 0.7282 | 4.1526 | 2.6533 | 0.6389 | 1.5651 | 1.0259 |
| 17 30 | TEA031230.1 TEA008343.1 | 1139     | 4521     | 1618.333 | 6232.667 | 0.7038 | 0.7254 | 2.0905 | 2.5621 | 1.2256 | 0.8159 | 0.9703 |
| 18 19 | TEA022171.1 TEA011280.1 | 906.1667 | 3708.833 | 1322.167 | 5085.833 | 0.6854 | 0.7292 | 1.8385 | 2.6906 | 1.4635 | 0.6833 | 0.9398 |
| 18 20 | TEA022171.1 TEA031223.1 | 607.8333 | 2455.167 | 862.8333 | 3379.167 | 0.7045 | 0.7266 | 2.1011 | 2.5992 | 1.2371 | 0.8084 | 0.9696 |
| 18 21 | TEA022171.1 TEA007232.1 | 994.5    | 3956.5   | 1422.167 | 5411.833 | 0.6993 | 0.7311 | 2.0204 | 2.76   | 1.3661 | 0.732  | 0.9565 |
| 18 22 | TEA022171.1 TEA016553.1 | 967.1667 | 3901.833 | 1395.833 | 5438.167 | 0.6929 | 0.7175 | 1.9314 | 2.3539 | 1.2187 | 0.8205 | 0.9657 |
| 18 23 | TEA022171.1 TEA033032.1 | 989      | 3981     | 1382     | 5452     | 0.7156 | 0.7302 | 2.3122 | 2.7254 | 1.1787 | 0.8484 | 0.9801 |
| 18 24 | TEA022171.1 TEA001764.1 | 671.8333 | 2676.167 | 942.5    | 3719.5   | 0.7128 | 0.7195 | 2.2532 | 2.4017 | 1.0659 | 0.9382 | 0.9907 |
| 18 25 | TEA022171.1 TEA026000.1 | 1002     | 3950     | 1422.667 | 5411.333 | 0.7043 | 0.7299 | 2.0987 | 2.7164 | 1.2943 | 0.7726 | 0.9649 |
| 18 26 | TEA022171.1 TEA033556.1 | 507      | 2029     | 707      | 2731     | 0.7171 | 0.743  | 2.3453 | 3.5004 | 1.4925 | 0.67   | 0.9652 |
| 18 27 | TEA022171.1 TEA013875.1 | 648      | 2473     | 892.5    | 3448.5   | 0.7261 | 0.7171 | 2.5831 | 2.3455 | 0.908  | 1.1013 | 1.0124 |
| 18 28 | TEA022171.1 TEA002722.1 | 1036.333 | 3977.667 | 1408.333 | 5425.667 | 0.7359 | 0.7331 | 2.9782 | 2.8455 | 0.9554 | 1.0466 | 1.0037 |
| 18 29 | TEA022171.1 TEA030052.1 | 1030.333 | 3914.667 | 1426.667 | 5407.333 | 0.7222 | 0.724  | 2.4712 | 2.5202 | 1.0198 | 0.9806 | 0.9976 |
| 18 30 | TEA022171.1 TEA008343.1 | 981.5    | 3896.5   | 1395.333 | 5438.667 | 0.7034 | 0.7164 | 2.0841 | 2.3301 | 1.118  | 0.8944 | 0.9818 |
| 19 20 | TEA011280.1 TEA031223.1 | 603.1667 | 2420.833 | 869.3333 | 3372.667 | 0.6938 | 0.7178 | 1.9437 | 2.3606 | 1.2145 | 0.8234 | 0.9666 |
| 19 21 | TEA011280.1 TEA007232.1 | 955.1667 | 3731.833 | 1345.333 | 5062.667 | 0.71   | 0.7371 | 2.1981 | 3.0488 | 1.387  | 0.721  | 0.9632 |
| 19 22 | TEA011280.1 TEA016553.1 | 918.6667 | 3661.333 | 1316.667 | 5091.333 | 0.6977 | 0.7191 | 1.9976 | 2.3927 | 1.1978 | 0.8349 | 0.9702 |
| 19 23 | TEA011280.1 TEA033032.1 | 931.8333 | 3711.167 | 1306.833 | 5101.167 | 0.713  | 0.7275 | 2.2578 | 2.6304 | 1.165  | 0.8584 | 0.9801 |
| 19 24 | TEA011280.1 TEA001764.1 | 662.3333 | 2680.667 | 950      | 3712     | 0.6972 | 0.7222 | 1.9901 | 2.4703 | 1.2413 | 0.8056 | 0.9654 |
| 19 25 | TEA011280.1 TEA026000.1 | 957.5    | 3740.5   | 1341.167 | 5066.833 | 0.7139 | 0.7382 | 2.276  | 3.116  | 1.3691 | 0.7304 | 0.9671 |
| 19 26 | TEA011280.1 TEA033556.1 | 510.8333 | 1941.167 | 711.8333 | 2726.167 | 0.7176 | 0.712  | 2.3571 | 2.2379 | 0.9494 | 1.0533 | 1.0078 |
| 19 27 | TEA011280.1 TEA013875.1 | 648.5    | 2514.5   | 898.5    | 3442.5   | 0.7218 | 0.7304 | 2.4595 | 2.7345 | 1.1118 | 0.8994 | 0.9881 |
| 19 28 | TEA011280.1 TEA002722.1 | 987.8333 | 3770.167 | 1324.833 | 5083.167 | 0.7456 | 0.7417 | 3.8587 | 3.3775 | 0.8753 | 1.1425 | 1.0053 |
| 19 29 | TEA011280.1 TEA030052.1 | 1022.667 | 3637.333 | 1347.833 | 5060.167 | 0.7587 | 0.7188 | nan    | 2.3851 | nan    | nan    | 1.0556 |
| 19 30 | TEA011280.1 TEA008343.1 | 940.1667 | 3719.833 | 1319.333 | 5088.667 | 0.7126 | 0.731  | 2.2489 | 2.7569 | 1.2259 | 0.8158 | 0.9748 |
| 20 21 | TEA031223.1 TEA007232.1 | 646      | 2427     | 887.1667 | 3354.833 | 0.7282 | 0.7234 | 2.6523 | 2.5053 | 0.9446 | 1.0587 | 1.0065 |
| 20 22 | TEA031223.1 TEA016553.1 | 627      | 2464     | 868.6667 | 3373.333 | 0.7218 | 0.7304 | 2.4605 | 2.7347 | 1.1114 | 0.8997 | 0.9882 |
| 20 23 | TEA031223.1 TEA033032.1 | 611.1667 | 2439.833 | 853.8333 | 3388.167 | 0.7158 | 0.7201 | 2.3157 | 2.4168 | 1.0465 | 0.9582 | 0.994  |
| 20 24 | TEA031223.1 TEA001764.1 | 618.1667 | 2432.833 | 856.8333 | 3385.167 | 0.7215 | 0.7187 | 2.4514 | 2.3817 | 0.9716 | 1.0293 | 1.0039 |
| 20 25 | TEA031223.1 TEA026000.1 | 658.8333 | 2493.167 | 888.3333 | 3353.667 | 0.7417 | 0.7434 | 3.3735 | 3.5515 | 1.0528 | 0.9499 | 0.9976 |
| 20 26 | TEA031223.1 TEA033556.1 | 484.5    | 2045.5   | 707.6667 | 2730.333 | 0.6846 | 0.7492 | 1.8302 | 5.1102 | 2.7921 | 0.3581 | 0.9139 |
| 20 27 | TEA031223.1 TEA013875.1 | 606.5    | 2446.5   | 872.3333 | 3369.667 | 0.6953 | 0.726  | 1.9631 | 2.5826 | 1.3156 | 0.7601 | 0.9576 |
| 20 28 | TEA031223.1 TEA002722.1 | 623.6667 | 2455.333 | 864.5    | 3377.5   | 0.7214 | 0.727  | 2.4505 | 2.6124 | 1.0661 | 0.938  | 0.9924 |



|    |    |                         |          |          |          |          |        |        |        |        |        |        |        |
|----|----|-------------------------|----------|----------|----------|----------|--------|--------|--------|--------|--------|--------|--------|
| 20 | 29 | TEA031223.1 TEA030052.1 | 667.8333 | 2447.167 | 885.5    | 3356.5   | 0.7542 | 0.7291 | nan    | 2.6846 | nan    | nan    | 1.0344 |
| 20 | 30 | TEA031223.1 TEA008343.1 | 615.6667 | 2461.333 | 859.6667 | 3382.333 | 0.7162 | 0.7277 | 2.324  | 2.6367 | 1.1345 | 0.8814 | 0.9842 |
| 21 | 22 | TEA007232.1 TEA016553.1 | 1161     | 4450     | 1618.5   | 6202.5   | 0.7173 | 0.7175 | 2.3502 | 2.353  | 1.0012 | 0.9988 | 0.9998 |
| 21 | 23 | TEA007232.1 TEA033032.1 | 1155.167 | 4564.833 | 1605.833 | 6215.167 | 0.7194 | 0.7345 | 2.3982 | 2.9078 | 1.2125 | 0.8248 | 0.9794 |
| 21 | 24 | TEA007232.1 TEA001764.1 | 688      | 2682     | 970.6667 | 3691.333 | 0.7088 | 0.7266 | 2.1761 | 2.5994 | 1.1943 | 0.8371 | 0.9755 |
| 21 | 25 | TEA007232.1 TEA026000.1 | 1193.333 | 4558.667 | 1651.333 | 6169.667 | 0.7226 | 0.7389 | 2.4835 | 3.1588 | 1.2719 | 0.7862 | 0.978  |
| 21 | 26 | TEA007232.1 TEA033556.1 | 504.3333 | 1981.667 | 730      | 2708     | 0.6909 | 0.7318 | 1.9052 | 2.7883 | 1.4635 | 0.6833 | 0.9441 |
| 21 | 27 | TEA007232.1 TEA013875.1 | 640.5    | 2513.5   | 917.5    | 3423.5   | 0.6981 | 0.7342 | 2.003  | 2.8946 | 1.4451 | 0.692  | 0.9508 |
| 21 | 28 | TEA007232.1 TEA002722.1 | 1217     | 4527     | 1643.833 | 6177.167 | 0.7403 | 0.7329 | 3.2643 | 2.834  | 0.8682 | 1.1518 | 1.0102 |
| 21 | 29 | TEA007232.1 TEA030052.1 | 1202     | 4516     | 1656.333 | 6164.667 | 0.7257 | 0.7326 | 2.5722 | 2.8211 | 1.0968 | 0.9118 | 0.9906 |
| 21 | 30 | TEA007232.1 TEA008343.1 | 1195     | 4541     | 1625.167 | 6195.833 | 0.7353 | 0.7329 | 2.9496 | 2.8363 | 0.9616 | 1.04   | 1.0033 |
| 22 | 23 | TEA016553.1 TEA033032.1 | 2165.167 | 8170.833 | 2996.833 | 11196.17 | 0.7225 | 0.7298 | 2.479  | 2.7104 | 1.0933 | 0.9146 | 0.99   |
| 22 | 24 | TEA016553.1 TEA001764.1 | 690.8333 | 2713.167 | 947.8333 | 3714.167 | 0.7289 | 0.7305 | 2.6765 | 2.7369 | 1.0226 | 0.9779 | 0.9978 |
| 22 | 25 | TEA016553.1 TEA026000.1 | 1553.167 | 6053.833 | 2175     | 8361     | 0.7141 | 0.7241 | 2.2795 | 2.5231 | 1.1069 | 0.9034 | 0.9862 |
| 22 | 26 | TEA016553.1 TEA033556.1 | 513.3333 | 2013.667 | 716      | 2722     | 0.7169 | 0.7398 | 2.3414 | 3.2214 | 1.3758 | 0.7268 | 0.9691 |
| 22 | 27 | TEA016553.1 TEA013875.1 | 637.3333 | 2512.667 | 897.3333 | 3443.667 | 0.7103 | 0.7296 | 2.2031 | 2.7052 | 1.2279 | 0.8144 | 0.9734 |
| 22 | 28 | TEA016553.1 TEA002722.1 | 1710     | 6589     | 2366.667 | 8976.333 | 0.7225 | 0.734  | 2.4804 | 2.8876 | 1.1642 | 0.859  | 0.9843 |
| 22 | 29 | TEA016553.1 TEA030052.1 | 1310     | 4946     | 1754.167 | 6705.833 | 0.7468 | 0.7376 | 4.0911 | 3.0748 | 0.7516 | 1.3305 | 1.0125 |
| 22 | 30 | TEA016553.1 TEA008343.1 | 1128.333 | 4551.667 | 1597.667 | 6253.333 | 0.7062 | 0.7279 | 2.131  | 2.6426 | 1.2401 | 0.8064 | 0.9703 |
| 23 | 24 | TEA033032.1 TEA001764.1 | 667.1667 | 2652.833 | 935      | 3727     | 0.7135 | 0.7118 | 2.268  | 2.2327 | 0.9844 | 1.0158 | 1.0025 |
| 23 | 25 | TEA033032.1 TEA026000.1 | 1548.333 | 6164.667 | 2170.167 | 8365.833 | 0.7135 | 0.7369 | 2.2663 | 3.0348 | 1.3391 | 0.7468 | 0.9682 |
| 23 | 26 | TEA033032.1 TEA033556.1 | 519.3333 | 1953.667 | 696.6667 | 2741.333 | 0.7455 | 0.7127 | 3.8295 | 2.2502 | 0.5876 | 1.7018 | 1.046  |
| 23 | 27 | TEA033032.1 TEA013875.1 | 630.3333 | 2503.667 | 885.1667 | 3455.833 | 0.7121 | 0.7245 | 2.239  | 2.5353 | 1.1323 | 0.8831 | 0.9829 |
| 23 | 28 | TEA033032.1 TEA002722.1 | 1689.833 | 6498.167 | 2347     | 8996     | 0.72   | 0.7223 | 2.4141 | 2.4751 | 1.0253 | 0.9754 | 0.9968 |
| 23 | 29 | TEA033032.1 TEA030052.1 | 1259.833 | 4940.167 | 1745.333 | 6714.667 | 0.7218 | 0.7357 | 2.4614 | 2.9713 | 1.2071 | 0.8284 | 0.9811 |
| 23 | 30 | TEA033032.1 TEA008343.1 | 1107.5   | 4563.5   | 1585.167 | 6265.833 | 0.6987 | 0.7283 | 2.0113 | 2.6576 | 1.3213 | 0.7568 | 0.9593 |
| 24 | 25 | TEA001764.1 TEA026000.1 | 681.8333 | 2790.167 | 972.5    | 3689.5   | 0.7011 | 0.7562 | 2.0479 | nan    | nan    | nan    | 0.9271 |
| 24 | 26 | TEA001764.1 TEA033556.1 | 495.5    | 1991.5   | 700.8333 | 2737.167 | 0.707  | 0.7276 | 2.1444 | 2.6325 | 1.2272 | 0.8146 | 0.9717 |
| 24 | 27 | TEA001764.1 TEA013875.1 | 650.8333 | 2510.167 | 888.8333 | 3452.167 | 0.7322 | 0.7271 | 2.8071 | 2.6176 | 0.9325 | 1.0724 | 1.007  |
| 24 | 28 | TEA001764.1 TEA002722.1 | 670.1667 | 2749.833 | 951.3333 | 3710.667 | 0.7044 | 0.7411 | 2.1009 | 3.3223 | 1.5814 | 0.6324 | 0.9506 |
| 24 | 29 | TEA001764.1 TEA030052.1 | 708.5    | 2692.5   | 964      | 3698     | 0.735  | 0.7281 | 2.9319 | 2.6501 | 0.9039 | 1.1064 | 1.0094 |
| 24 | 30 | TEA001764.1 TEA008343.1 | 704      | 2694     | 942.1667 | 3719.833 | 0.7472 | 0.7242 | 4.1966 | 2.528  | 0.6024 | 1.66   | 1.0317 |
| 25 | 26 | TEA026000.1 TEA033556.1 | 520.8333 | 2026.167 | 728.1667 | 2709.833 | 0.7153 | 0.7477 | 2.3043 | 4.3433 | 1.8849 | 0.5305 | 0.9566 |

|       |                         |          |          |          |          |        |        |        |        |        |        |        |
|-------|-------------------------|----------|----------|----------|----------|--------|--------|--------|--------|--------|--------|--------|
| 25 27 | TEA026000.1 TEA013875.1 | 664.8333 | 2571.167 | 918.1667 | 3422.833 | 0.7241 | 0.7512 | 2.524  | nan    | nan    | nan    | 0.9639 |
| 25 28 | TEA026000.1 TEA002722.1 | 1583     | 6179     | 2191.5   | 8344.5   | 0.7223 | 0.7405 | 2.475  | 3.2756 | 1.3235 | 0.7556 | 0.9755 |
| 25 29 | TEA026000.1 TEA030052.1 | 1292.5   | 4976.5   | 1781.667 | 6678.333 | 0.7254 | 0.7452 | 2.5643 | 3.7841 | 1.4757 | 0.6777 | 0.9735 |
| 25 30 | TEA026000.1 TEA008343.1 | 1186     | 4602     | 1631.167 | 6219.833 | 0.7271 | 0.7399 | 2.6163 | 3.23   | 1.2346 | 0.81   | 0.9827 |
| 26 27 | TEA033556.1 TEA013875.1 | 506.1667 | 1973.833 | 715.5    | 2722.5   | 0.7074 | 0.725  | 2.1517 | 2.5511 | 1.1856 | 0.8434 | 0.9758 |
| 26 28 | TEA033556.1 TEA002722.1 | 537.5    | 2017.5   | 709.8333 | 2728.167 | 0.7572 | 0.7395 | nan    | 3.2021 | nan    | nan    | 1.024  |
| 26 29 | TEA033556.1 TEA030052.1 | 554.8333 | 1929.167 | 725.3333 | 2712.667 | 0.7649 | 0.7112 | nan    | 2.2207 | nan    | nan    | 1.0756 |
| 26 30 | TEA033556.1 TEA008343.1 | 499.8333 | 1989.167 | 705.5    | 2732.5   | 0.7085 | 0.728  | 2.1704 | 2.6456 | 1.2189 | 0.8204 | 0.9732 |
| 27 28 | TEA013875.1 TEA002722.1 | 667      | 2535     | 896.1667 | 3444.833 | 0.7443 | 0.7359 | 3.6572 | 2.9796 | 0.8147 | 1.2274 | 1.0114 |
| 27 29 | TEA013875.1 TEA030052.1 | 667.8333 | 2482.167 | 916.3333 | 3424.667 | 0.7288 | 0.7248 | 2.6749 | 2.5446 | 0.9529 | 1.0512 | 1.0055 |
| 27 30 | TEA013875.1 TEA008343.1 | 642.1667 | 2528.833 | 890      | 3451     | 0.7215 | 0.7328 | 2.4536 | 2.8306 | 1.1536 | 0.8668 | 0.9847 |
| 28 29 | TEA002722.1 TEA030052.1 | 1311.333 | 4937.667 | 1784.333 | 6675.667 | 0.7349 | 0.7397 | 2.9298 | 3.2124 | 1.0744 | 0.912  | 0.9936 |
| 28 30 | TEA002722.1 TEA008343.1 | 1198.833 | 4603.167 | 1624.333 | 6226.667 | 0.738  | 0.7393 | 3.1043 | 3.185  | 1.026  | 0.9746 | 0.9983 |
| 29 30 | TEA030052.1 TEA008343.1 | 1187     | 4619     | 1636.833 | 6214.167 | 0.7252 | 0.7433 | 2.5563 | 3.5387 | 1.3843 | 0.7224 | 0.9756 |

**Supplementary Table S6:** Ka/Ks ratios of MAPKKs of ZIK subfamily in **C. sinensis**.

| Compare | Sequence names          | Sd       | Sn       | S        | N        | ps     | pn     | ds     | dn     | dn/ds   | ds/dn  | ps/pn  |
|---------|-------------------------|----------|----------|----------|----------|--------|--------|--------|--------|---------|--------|--------|
| 0 1     | TEA010125.1 TEA022762.1 | 1691.667 | 6732.333 | 2360.833 | 9324.167 | 0.7166 | 0.722  | 2.3326 | 2.4667 | 1.0575  | 0.9456 | 0.9924 |
| 0 2     | TEA010125.1 TEA024720.1 | 1437.333 | 5815.667 | 2052.833 | 8048.167 | 0.7002 | 0.7226 | 2.0336 | 2.4824 | 1.2207  | 0.8192 | 0.9689 |
| 0 3     | TEA010125.1 TEA002087.1 | 842.6667 | 3302.333 | 1151.667 | 4584.333 | 0.7317 | 0.7204 | 2.7846 | 2.423  | 0.8701  | 1.1492 | 1.0157 |
| 0 4     | TEA010125.1 TEA013346.1 | 1408.833 | 5667.167 | 1998.167 | 7757.833 | 0.7051 | 0.7305 | 2.1111 | 2.7376 | 1.2968  | 0.7712 | 0.9652 |
| 0 5     | TEA010125.1 TEA013344.1 | 441.5    | 1697.5   | 605.3333 | 2370.667 | 0.7294 | 0.716  | 2.6943 | 2.3212 | 0.8615  | 1.1607 | 1.0186 |
| 0 6     | TEA010125.1 TEA031068.1 | 957      | 4004     | 1365.167 | 5546.833 | 0.701  | 0.7219 | 2.0464 | 2.462  | 1.2031  | 0.8312 | 0.9711 |
| 0 7     | TEA010125.1 TEA020698.1 | 714      | 2845     | 988      | 3941     | 0.7227 | 0.7219 | 2.4841 | 2.4632 | 0.9916  | 1.0085 | 1.0011 |
| 0 8     | TEA010125.1 TEA027328.1 | 699.3333 | 2752.667 | 966.6667 | 3812.333 | 0.7234 | 0.722  | 2.5057 | 2.467  | 0.9845  | 1.0157 | 1.0019 |
| 0 9     | TEA010125.1 TEA020112.1 | 312      | 1296     | 446.1667 | 1734.833 | 0.6993 | 0.747  | 2.0205 | 4.1526 | 2.0552  | 0.4865 | 0.9361 |
| 0 10    | TEA010125.1 TEA033250.1 | 930.1667 | 3733.833 | 1290.167 | 5120.833 | 0.721  | 0.7291 | 2.4387 | 2.6869 | 1.1018  | 0.9076 | 0.9888 |
| 1 2     | TEA022762.1 TEA024720.1 | 1473.333 | 5804.667 | 2070.667 | 8030.333 | 0.7115 | 0.7228 | 2.2276 | 2.4888 | 1.1175  | 0.895  | 0.9843 |
| 1 3     | TEA022762.1 TEA002087.1 | 836      | 3341     | 1165.833 | 4570.167 | 0.7171 | 0.731  | 2.3446 | 2.7585 | 1.17653 | 0.8499 | 0.9809 |
| 1 4     | TEA022762.1 TEA013346.1 | 1459.333 | 5610.667 | 2014.667 | 7741.333 | 0.7244 | 0.7248 | 2.5318 | 2.544  | 1.0048  | 0.9952 | 0.9994 |
| 1 5     | TEA022762.1 TEA013344.1 | 468.1667 | 1715.833 | 618      | 2358     | 0.7576 | 0.7277 | nan    | 2.6354 | nan     | nan    | 1.0411 |
| 1 6     | TEA022762.1 TEA031068.1 | 1094.333 | 4497.667 | 1531.5   | 6106.5   | 0.7146 | 0.7365 | 2.289  | 3.0151 | 1.3172  | 0.7592 | 0.9701 |

|   |    |                         |          |          |          |          |        |        |        |        |        |        |        |
|---|----|-------------------------|----------|----------|----------|----------|--------|--------|--------|--------|--------|--------|--------|
| 1 | 7  | TEA022762.1 TEA020698.1 | 702      | 2859     | 995.3333 | 3933.667 | 0.7053 | 0.7268 | 2.1149 | 2.607  | 1.2327 | 0.8112 | 0.9704 |
| 1 | 8  | TEA022762.1 TEA027328.1 | 680.8333 | 2755.167 | 977.3333 | 3801.667 | 0.6966 | 0.7247 | 1.982  | 2.5427 | 1.2829 | 0.7795 | 0.9612 |
| 1 | 9  | TEA022762.1 TEA020112.1 | 301.8333 | 1249.167 | 446.6667 | 1734.333 | 0.6757 | 0.7203 | 1.7344 | 2.4206 | 1.3956 | 0.7165 | 0.9382 |
| 1 | 10 | TEA022762.1 TEA033250.1 | 958.3333 | 3710.667 | 1310     | 5101     | 0.7316 | 0.7274 | 2.7788 | 2.6279 | 0.9457 | 1.0574 | 1.0057 |
| 2 | 3  | TEA024720.1 TEA002087.1 | 877.8333 | 3286.167 | 1183.667 | 4552.333 | 0.7416 | 0.7219 | 3.3709 | 2.4623 | 0.7304 | 1.369  | 1.0274 |
| 2 | 4  | TEA024720.1 TEA013346.1 | 1498.333 | 5602.667 | 2028.667 | 7727.333 | 0.7386 | 0.725  | 3.1386 | 2.5523 | 0.8132 | 1.2297 | 1.0187 |
| 2 | 5  | TEA024720.1 TEA013344.1 | 438.5    | 1723.5   | 627.1667 | 2348.833 | 0.6992 | 0.7338 | 2.0188 | 2.8748 | 1.424  | 0.7022 | 0.9529 |
| 2 | 6  | TEA024720.1 TEA031068.1 | 782.5    | 3087.5   | 1086.167 | 4241.833 | 0.7204 | 0.7279 | 2.4248 | 2.6423 | 1.897  | 0.9177 | 0.9898 |
| 2 | 7  | TEA024720.1 TEA020698.1 | 732.6667 | 2853.333 | 1010.5   | 3918.5   | 0.7251 | 0.7282 | 2.5525 | 2.6526 | 1.0392 | 0.9623 | 0.9957 |
| 2 | 8  | TEA024720.1 TEA027328.1 | 722.1667 | 2729.833 | 990.1667 | 3788.833 | 0.7293 | 0.7205 | 2.6939 | 2.4266 | 0.9008 | 1.1101 | 1.0123 |
| 2 | 9  | TEA024720.1 TEA020112.1 | 340.5    | 1288.5   | 456.1667 | 1724.833 | 0.7464 | 0.747  | 4.0123 | 4.1483 | 1.0339 | 0.9672 | 0.9992 |
| 2 | 10 | TEA024720.1 TEA033250.1 | 946.6667 | 3733.333 | 1325.667 | 5085.333 | 0.7141 | 0.7341 | 2.2796 | 2.8921 | 1.2687 | 0.7882 | 0.9727 |
| 3 | 4  | TEA002087.1 TEA013346.1 | 848.3333 | 3376.667 | 1178.5   | 4557.5   | 0.7198 | 0.7409 | 2.4102 | 3.3091 | 1.3729 | 0.7284 | 0.9716 |
| 3 | 5  | TEA002087.1 TEA013344.1 | 472.1667 | 1750.833 | 618.3333 | 2357.667 | 0.7636 | 0.7426 | nan    | 3.4652 | nan    | nan    | 1.0283 |
| 3 | 6  | TEA002087.1 TEA031068.1 | 535.6667 | 2145.333 | 755      | 2935     | 0.7095 | 0.7309 | 2.1889 | 2.7547 | 1.2585 | 0.7946 | 0.9706 |
| 3 | 7  | TEA002087.1 TEA020698.1 | 750.6667 | 2886.333 | 1015.5   | 3913.5   | 0.7392 | 0.7375 | 3.181  | 3.0727 | 0.966  | 1.0352 | 1.0023 |
| 3 | 8  | TEA002087.1 TEA027328.1 | 735.5    | 2805.5   | 995      | 3784     | 0.7392 | 0.7414 | 3.1801 | 3.3522 | 1.0541 | 0.9487 | 0.997  |
| 3 | 9  | TEA002087.1 TEA020112.1 | 326.3333 | 1248.667 | 446.1667 | 1734.833 | 0.7314 | 0.7198 | 2.7733 | 2.4082 | 0.8683 | 1.1516 | 1.0162 |
| 3 | 10 | TEA002087.1 TEA033250.1 | 891.8333 | 3355.167 | 1192     | 4544     | 0.7482 | 0.7384 | 4.5169 | 3.1251 | 0.6919 | 1.4454 | 1.0133 |
| 4 | 5  | TEA013346.1 TEA013344.1 | 428.8333 | 1722.167 | 621      | 2355     | 0.6906 | 0.7313 | 1.9012 | 2.7679 | 1.4559 | 0.6869 | 0.9443 |
| 4 | 6  | TEA013346.1 TEA031068.1 | 743.5    | 2872.5   | 1027.5   | 3955.5   | 0.7236 | 0.7262 | 2.5101 | 2.5879 | 1.031  | 0.9699 | 0.9964 |
| 4 | 7  | TEA013346.1 TEA020698.1 | 724.6667 | 2862.333 | 1006.833 | 3922.167 | 0.7197 | 0.7298 | 2.4079 | 2.7102 | 1.1255 | 0.8885 | 0.9862 |
| 4 | 8  | TEA013346.1 TEA027328.1 | 735      | 2760     | 989.8333 | 3789.167 | 0.7425 | 0.7284 | 3.4588 | 2.6603 | 0.7691 | 1.3002 | 1.0194 |
| 4 | 9  | TEA013346.1 TEA020112.1 | 322.3333 | 1236.667 | 446.3333 | 1734.667 | 0.7222 | 0.7129 | 2.4708 | 2.2551 | 0.9127 | 1.0956 | 1.013  |
| 4 | 10 | TEA013346.1 TEA033250.1 | 955.5    | 3713.5   | 1318.833 | 5092.167 | 0.7245 | 0.7293 | 2.5362 | 2.6909 | 1.061  | 0.9425 | 0.9935 |
| 5 | 6  | TEA013344.1 TEA031068.1 | 470.3333 | 1712.667 | 620.8333 | 2355.167 | 0.7576 | 0.7272 | nan    | 2.6198 | nan    | nan    | 1.0418 |
| 5 | 7  | TEA013344.1 TEA020698.1 | 441.6667 | 1694.333 | 618.1667 | 2357.833 | 0.7145 | 0.7186 | 2.2874 | 2.3799 | 1.0404 | 0.9612 | 0.9943 |
| 5 | 8  | TEA013344.1 TEA027328.1 | 452.5    | 1701.5   | 620.1667 | 2355.833 | 0.7296 | 0.7222 | 2.705  | 2.4726 | 0.9141 | 1.094  | 1.0102 |
| 5 | 9  | TEA013344.1 TEA020112.1 | 308.5    | 1257.5   | 455.1667 | 1725.833 | 0.6778 | 0.7286 | 1.7552 | 2.6687 | 1.5204 | 0.6577 | 0.9302 |
| 5 | 10 | TEA013344.1 TEA033250.1 | 467.6667 | 1689.333 | 627.3333 | 2348.667 | 0.7455 | 0.7193 | 3.8343 | 2.3962 | 0.6249 | 1.6001 | 1.0364 |
| 6 | 7  | TEA031068.1 TEA020698.1 | 549.1667 | 2114.833 | 753.5    | 2936.5   | 0.7288 | 0.7202 | 2.6753 | 2.4189 | 0.9042 | 1.106  | 1.012  |
| 6 | 8  | TEA031068.1 TEA027328.1 | 542.1667 | 2114.833 | 762.1667 | 2927.833 | 0.7113 | 0.7223 | 2.2241 | 2.4745 | 1.1126 | 0.8988 | 0.9848 |
| 6 | 9  | TEA031068.1 TEA020112.1 | 328.3333 | 1244.667 | 452.6667 | 1728.333 | 0.7253 | 0.7202 | 2.5609 | 2.418  | 0.9442 | 1.0591 | 1.0072 |

|      |                         |          |          |          |          |        |        |        |        |        |        |        |
|------|-------------------------|----------|----------|----------|----------|--------|--------|--------|--------|--------|--------|--------|
| 6 10 | TEA031068.1 TEA033250.1 | 558.6667 | 2136.333 | 758      | 2932     | 0.737  | 0.7286 | 3.0429 | 2.6684 | 0.8769 | 1.1403 | 1.0115 |
| 7 8  | TEA020698.1 TEA027328.1 | 728.3333 | 2751.667 | 985.5    | 3793.5   | 0.739  | 0.7254 | 3.17   | 2.5619 | 0.8082 | 1.2374 | 1.0189 |
| 7 9  | TEA020698.1 TEA020112.1 | 322      | 1235     | 449.8333 | 1731.167 | 0.7158 | 0.7134 | 2.3163 | 2.2648 | 0.9778 | 1.0227 | 1.0034 |
| 7 10 | TEA020698.1 TEA033250.1 | 781.8333 | 2832.167 | 1016.833 | 3912.167 | 0.7689 | 0.7239 | nan    | 2.5197 | nan    | nan    | 1.0621 |
| 8 9  | TEA027328.1 TEA020112.1 | 314.1667 | 1253.833 | 450.5    | 1730.5   | 0.6974 | 0.7245 | 1.9926 | 2.5375 | 1.2735 | 0.7853 | 0.9625 |
| 8 10 | TEA027328.1 TEA033250.1 | 736      | 2742     | 998      | 3781     | 0.7375 | 0.7252 | 3.0693 | 2.5571 | 0.8331 | 1.2003 | 1.0169 |
| 9 10 | TEA020112.1 TEA033250.1 | 330.3333 | 1284.667 | 453.1667 | 1727.833 | 0.7289 | 0.7435 | 2.6797 | 3.5627 | 1.3295 | 0.7521 | 0.9804 |

**Supplementary Table S7:** Tissue specific expression data of tea MAPKKs

| <b>MEKK</b> | <b>Gene</b> | <b>Apical bud</b> | <b>Flower</b> | <b>Fruit</b> | <b>Young leaf</b> | <b>Mature leaf</b> | <b>Old leaf</b> | <b>Root</b> | <b>Stem</b> |
|-------------|-------------|-------------------|---------------|--------------|-------------------|--------------------|-----------------|-------------|-------------|
|             | TEA028357.1 | 10.60070377       | 1.657135892   | 5.858041183  | 5.227850598       | 2.589275721        | 1.714886623     | 7.980895909 | 10.58941704 |
|             | TEA025870.1 | 19.97183129       | 1.215232988   | 0.292445114  | 17.02051031       | 2.960498047        | 3.925958717     | 6.737247099 | 6.880238296 |
|             | TEA016319.1 | 58.03599874       | 50.65814207   | 76.57492523  | 109.7248708       | 91.04227536        | 69.21352052     | 34.65569402 | 79.8626543  |
|             | TEA008165.1 | 37.51964083       | 11.55977825   | 24.36433353  | 29.07027742       | 37.94820224        | 27.23797079     | 23.48243974 | 39.17699935 |
|             | TEA027265.1 | 38.85460933       | 26.13253086   | 29.0891499   | 42.01135021       | 54.95946531        | 42.79382051     | 40.02198967 | 43.52999928 |
|             | TEA006319.1 | 101.6332593       | 30.40091119   | 26.82270027  | 131.6389921       | 90.6339308         | 59.85563667     | 33.96042578 | 79.29570729 |
|             | TEA006473.1 | 3.846817108       | 55.97102017   | 0.950446619  | 4.028016034       | 6.292218419        | 0.235035223     | 7.765460682 | 7.226172065 |
|             | TEA014429.1 | 17.36337311       | 11.45934578   | 16.10275907  | 15.1179155        | 14.46839014        | 10.3502548      | 16.09888696 | 19.93923808 |
|             | TEA031711.1 | 14.7110015        | 21.66328557   | 13.29711376  | 15.64070056       | 25.22455703        | 9.514574007     | 27.67363416 | 25.37808567 |
|             | TEA001470.1 | 28.7896495        | 19.97601994   | 31.10884897  | 30.46722766       | 23.99952335        | 32.16500545     | 28.52558256 | 21.45750295 |
|             | TEA017119.1 | 0.895834121       | 113.9506899   | 13.55300324  | 1.465512217       | 1.69834214         | 6.023865703     | 17.98884145 | 1.787324474 |
|             | TEA005306.1 | 7.834157215       | 7.592695361   | 12.82189045  | 7.456114787       | 12.5937174         | 11.53413592     | 31.316448   | 11.25245677 |
|             | TEA009902.1 | 3.205680923       | 4.53954802    | 4.16734287   | 1.791181598       | 3.211073117        | 0.809565766     | 5.993016315 | 3.901364173 |
|             | TEA029598.1 | 2.441587114       | 55.45881453   | 15.49959102  | 3.625214431       | 0.825969674        | 4.927034664     | 19.80045586 | 3.411291334 |
|             | TEA005122.1 | 13.35846763       | 10.73623193   | 1.261169553  | 4.850759735       | 0.528991814        | 2.87265272      | 54.62262255 | 3.613086033 |
|             | TEA028214.1 | 25.67179545       | 0.110475726   | 1.535336847  | 4.250842453       | 0.343380651        | 0.113165107     | 50.53914575 | 1.066629121 |
| <b>ZIK</b>  | <b>Gene</b> | <b>Apical bud</b> | <b>Flower</b> | <b>Fruit</b> | <b>Young leaf</b> | <b>Mature leaf</b> | <b>Old leaf</b> | <b>Root</b> | <b>Stem</b> |
|             | TEA010125.1 | 0.175653749       | 0.311340683   | 3.271729709  | 1.285537032       | 55.12651535        | 63.85123545     | 38.26913032 | 1.595139046 |
|             | TEA022762.1 | 8.712425961       | 39.90182364   | 106.7790221  | 16.3606013        | 56.88054084        | 149.1342012     | 73.39486483 | 40.65682714 |
|             | TEA024720.1 | 4.101515044       | 28.42239136   | 53.59970599  | 1.311247773       | 28.02728558        | 14.84203905     | 15.95199931 | 55.25331034 |
|             | TEA002087.1 | 49.7275764        | 172.9447277   | 93.96627059  | 40.68296195       | 46.43063238        | 56.80017877     | 15.38403371 | 115.6764087 |
|             | TEA013346.1 | 30.90627718       | 15.87837482   | 8.352963559  | 20.58573301       | 10.74688633        | 3.133802967     | 9.498735008 | 24.67660886 |
|             | TEA013344.1 | 1.027574433       | 4.660066994   | 0.091389098  | 0.685619751       | 0.204172279        | 0               | 1.752859347 | 0.134529799 |
|             | TEA031068.1 | 1.378881931       | 0.220951452   | 0.612306957  | 1.156983329       | 0.733164093        | 0.156690148     | 0.548380578 | 1.354907262 |
|             | TEA020698.1 | 2.977331049       | 1.43618444    | 9.815189128  | 6.290561211       | 12.12040893        | 9.314358818     | 0.127302634 | 12.22299317 |
|             | TEA027328.1 | 7.359892092       | 8.225419974   | 2.083671435  | 5.424966276       | 3.368842605        | 1.906396805     | 3.917004127 | 4.074331058 |
|             | TEA020112.1 | 5.779008349       | 3.886736911   | 6.534320509  | 6.547668617       | 3.619417675        | 1.915101813     | 182.9926403 | 13.87578785 |
|             | TEA033250.1 | 6.903192344       | 12.27284885   | 12.91327955  | 8.038891575       | 16.38018512        | 22.98992676     | 6.580566934 | 18.54589373 |
| <b>Raf</b>  | <b>Gene</b> | <b>Apical bud</b> | <b>Flower</b> | <b>Fruit</b> | <b>Young leaf</b> | <b>Mature leaf</b> | <b>Old leaf</b> | <b>Root</b> | <b>Stem</b> |

|             |             |             |             |             |             |             |             |             |
|-------------|-------------|-------------|-------------|-------------|-------------|-------------|-------------|-------------|
| TEA001765.1 | 5.945879411 | 9.259874501 | 9.431354916 | 5.536379485 | 5.98596     | 2.977112818 | 5.728618536 | 8.792483297 |
| TEA002020.1 | 2.099062303 | 1.737481875 | 0.749390604 | 2.245404683 | 2.329420093 | 7.22515684  | 40.62912531 | 1.825761559 |
| TEA000256.1 | 16.06353537 | 18.80095994 | 27.72745234 | 17.10621278 | 21.7721894  | 20.3871293  | 22.09190328 | 24.72465522 |
| TEA029086.1 | 6.595798283 | 9.028879801 | 6.104791748 | 8.10745355  | 8.046243908 | 10.9857204  | 5.944053763 | 9.686145534 |
| TEA022129.1 | 7.948332152 | 5.353051095 | 9.26685454  | 8.441693178 | 7.03466307  | 10.71586514 | 7.4031378   | 9.503569378 |
| TEA019143.1 | 16.39727749 | 45.06405302 | 10.51888518 | 16.51486574 | 18.67248298 | 7.616882211 | 6.179074011 | 16.39341695 |
| TEA028452.1 | 11.81271464 | 4.288466824 | 9.001826155 | 13.86665945 | 35.21971814 | 11.12500053 | 16.57871997 | 16.22045006 |
| TEA016969.1 | 39.46939745 | 9.048966297 | 43.80279468 | 47.81340735 | 55.87824056 | 10.1413346  | 16.76477766 | 51.99576735 |
| TEA013270.1 | 5.5330931   | 5.152186138 | 4.414093435 | 5.416396029 | 7.062504745 | 5.571205274 | 4.377252112 | 9.196072695 |
| TEA026716.1 | 28.83356293 | 25.19850881 | 12.17302786 | 36.414979   | 15.10874865 | 13.64074791 | 14.1403849  | 26.99244326 |
| TEA028758.1 | 1.370099244 | 4.157904602 | 1.745531772 | 1.336958513 | 2.023161675 | 1.610426525 | 1.419913996 | 2.825125781 |
| TEA010804.1 | 18.18016304 | 14.33171466 | 21.29365984 | 14.05520489 | 21.40096707 | 12.40463674 | 8.049443481 | 18.3537083  |
| TEA009451.1 | 10.8554017  | 3.806390928 | 7.420794759 | 7.079023924 | 10.33854177 | 2.533157398 | 6.844964712 | 16.00904609 |
| TEA021421.1 | 34.09439272 | 72.13060593 | 75.65189534 | 26.30208768 | 65.85484056 | 81.49628715 | 67.88168152 | 69.58073394 |
| TEA017670.1 | 15.46631262 | 6.849495021 | 18.10418032 | 16.56628722 | 17.01126307 | 12.47427681 | 14.66918046 | 23.49466848 |
| TEA019184.1 | 3.881947858 | 3.454877254 | 6.570876148 | 4.627933316 | 20.52859461 | 18.3762724  | 6.844964712 | 5.794390632 |
| TEA000933.1 | 173.0804218 | 231.3462138 | 226.0600729 | 158.0096418 | 223.3273511 | 167.2406183 | 203.615667  | 211.3559236 |
| TEA031230.1 | 5.322308601 | 3.434790759 | 2.275588541 | 6.684792567 | 12.62155907 | 11.47320086 | 1.664726754 | 6.246026386 |
| TEA022171.1 | 40.19836051 | 38.11412552 | 23.52355383 | 34.65807839 | 25.89275721 | 60.12549192 | 46.96487948 | 40.11870794 |
| TEA011280.1 | 23.13359877 | 21.09082045 | 8.526602846 | 18.80312166 | 11.54501433 | 5.754010447 | 18.94850747 | 13.81813222 |
| TEA031223.1 | 2.76654655  | 32.00783084 | 1.919171058 | 3.633784678 | 3.573014884 | 1.558196475 | 3.025885688 | 6.591960155 |
| TEA007232.1 | 59.30948842 | 302.311803  | 51.26928399 | 49.37319228 | 66.39311293 | 22.04108087 | 28.29056231 | 89.49114421 |
| TEA016553.1 | 39.28496101 | 21.76371805 | 19.83143427 | 50.88155573 | 32.12001172 | 17.50577157 | 22.01356319 | 30.10584718 |
| TEA033032.1 | 9.327214084 | 8.576933649 | 8.279852281 | 7.370412318 | 7.025382512 | 5.162069887 | 6.120318949 | 15.23069511 |
| TEA001764.1 | 13.75368856 | 12.2628056  | 12.09991658 | 10.38713922 | 9.336241489 | 8.617958159 | 9.410602416 | 22.09171486 |
| TEA026000.1 | 6.270838847 | 17.98745687 | 25.56153072 | 7.113304911 | 20.29658065 | 48.93955633 | 13.17092638 | 13.21274812 |
| TEA033556.1 | 65.12362752 | 55.64963624 | 51.08650579 | 65.63095062 | 65.98476838 | 77.85759371 | 27.82052181 | 65.18929693 |
| TEA013875.1 | 28.04312106 | 64.58812681 | 39.13281177 | 39.92878022 | 99.37621657 | 52.4999047  | 22.19962089 | 47.29683365 |
| TEA002722.1 | 39.91731451 | 87.0749587  | 87.96200685 | 33.9296074  | 82.20718401 | 62.319154   | 65.45313897 | 88.66474687 |
| TEA030052.1 | 20.40218297 | 36.29629767 | 36.99430688 | 18.76884067 | 35.46101265 | 14.53736376 | 29.12292569 | 46.7106681  |
| TEA008343.1 | 80.28254608 | 72.49216285 | 87.93459012 | 65.87091753 | 186.0102268 | 154.6531764 | 35.85038027 | 73.57819083 |

**Supplementary Table S8:** Expression data of tea MAPKKs under cold stress

| <b>MEKK</b> | <b>Gene</b> | <b>CK</b>   | <b>CA1-6h</b> | <b>CA1-7d</b> | <b>CA2-7d</b> | <b>DA-7d</b> |
|-------------|-------------|-------------|---------------|---------------|---------------|--------------|
|             | TEA028357.1 | 1.271072595 | 1.55171842    | 1.645887675   | 1.562930846   | 3.949646057  |
|             | TEA025870.1 | 1.321020027 | 3.211394941   | 3.285005403   | 3.240964525   | 5.840108057  |
|             | TEA016319.1 | 25.83248455 | 37.96145705   | 57.65756766   | 54.34010206   | 22.55043625  |
|             | TEA008165.1 | 14.23324926 | 22.01910122   | 22.20661545   | 20.59298427   | 25.29883386  |
|             | TEA027265.1 | 27.13755191 | 43.06801379   | 43.43988621   | 50.33351452   | 32.58297138  |
|             | TEA006319.1 | 19.59668365 | 59.79544209   | 24.78367394   | 28.88540925   | 18.54500203  |
|             | TEA006473.1 | 0.979312377 | 0.821693392   | 0.315717982   | 0.243672007   | 5.066356705  |
|             | TEA014429.1 | 13.1429846  | 17.32021333   | 13.0728358    | 11.3941215    | 16.56420423  |
|             | TEA031711.1 | 35.14793487 | 37.72018613   | 39.94401141   | 24.69761268   | 49.37117673  |
|             | TEA001470.1 | 24.08189229 | 55.92295268   | 35.76363426   | 34.12262383   | 33.69491635  |
|             | TEA017119.1 | 1.517039928 | 2.363361085   | 3.684550886   | 14.025674     | 1.617121236  |
|             | TEA005306.1 | 14.80137642 | 17.36384872   | 12.98211323   | 12.93104296   | 19.88123095  |
|             | TEA009902.1 | 3.272419096 | 6.052180734   | 5.041938668   | 4.75777809    | 3.670281021  |
|             | TEA029598.1 | 1.765362021 | 3.913949118   | 2.454145731   | 9.155077523   | 1.653309296  |
|             | TEA005122.1 | 3.012555366 | 5.967656907   | 3.296042789   | 2.733067624   | 4.770304716  |
|             | TEA028214.1 | 2.525109113 | 2.389189836   | 2.438156009   | 0.200257988   | 5.667341535  |
|             | TEA031689.1 | 0           | 0             | 0             | 0             | 0            |
| <b>ZIK</b>  | <b>Gene</b> | <b>CK</b>   | <b>CA1-6h</b> | <b>CA1-7d</b> | <b>CA2-7d</b> | <b>DA-7d</b> |
|             | TEA010125.1 | 171.8985422 | 198.6455799   | 67.03776552   | 58.4380675    | 134.4104312  |
|             | TEA022762.1 | 34.69843009 | 40.57471889   | 41.80350807   | 55.99906299   | 52.72398141  |
|             | TEA024720.1 | 17.99146738 | 17.73906451   | 10.55262381   | 5.150869612   | 11.51088597  |
|             | TEA002087.1 | 16.2822216  | 18.40246837   | 19.78023441   | 21.45024694   | 29.34570263  |
|             | TEA013346.1 | 1.462217149 | 1.348576814   | 1.487123171   | 0.941019794   | 2.648841558  |
|             | TEA013344.1 | 0.035063252 | 0.037266937   | 0             | 0.040398429   | 0.083085608  |
|             | TEA031068.1 | 0.024118043 | 0.02436739    | 0.024563716   | 0             | 0.083886441  |
|             | TEA020698.1 | 10.16986316 | 2.418859474   | 9.686900219   | 11.30147051   | 4.049612215  |
|             | TEA027328.1 | 2.309864204 | 1.904314294   | 1.998636221   | 1.446316947   | 9.453017073  |
|             | TEA020112.1 | 7.383707412 | 7.956495028   | 5.684372506   | 2.646901124   | 17.44338035  |
|             | TEA033250.1 | 14.81022059 | 18.34825838   | 22.21544009   | 25.31524634   | 15.73664453  |
| <b>Raf</b>  | <b>Gene</b> | <b>CK</b>   | <b>CA1-6h</b> | <b>CA1-7d</b> | <b>CA2-7d</b> | <b>DA-7d</b> |
|             | TEA001765.1 | 5.98819739  | 7.330697821   | 5.140419023   | 4.202133859   | 9.682731356  |
|             | TEA002020.1 | 1.068593135 | 3.296417112   | 2.710732035   | 3.767767608   | 1.022671186  |
|             | TEA000256.1 | 23.62431721 | 30.55547298   | 20.7512083    | 27.01989621   | 28.52945611  |
|             | TEA029086.1 | 7.718669173 | 13.14653029   | 10.99510709   | 11.88940635   | 10.26734035  |
|             | TEA022129.1 | 5.674218414 | 10.54603089   | 9.152495787   | 10.96184933   | 9.683353581  |
|             | TEA019143.1 | 13.2198183  | 11.6500307    | 11.6662276    | 8.007975589   | 19.03868128  |
|             | TEA028452.1 | 2.514153402 | 1.715345076   | 1.703142471   | 1.25401883    | 1.230877684  |
|             | TEA016969.1 | 44.37837064 | 23.30300284   | 11.2324109    | 5.973580018   | 58.38198957  |
|             | TEA013270.1 | 3.201444658 | 3.683921302   | 3.970311189   | 4.303720378   | 5.650230338  |
|             | TEA026716.1 | 8.640684616 | 11.11269545   | 6.565005785   | 8.652903638   | 13.33303046  |
|             | TEA028758.1 | 1.680015812 | 1.371585673   | 0.904885236   | 1.022729242   | 2.204912061  |
|             | TEA010804.1 | 8.511581891 | 23.11970987   | 9.737885568   | 9.012692201   | 5.857487942  |
|             | TEA009451.1 | 5.984659723 | 7.485488006   | 6.002678611   | 7.565958819   | 10.42732297  |
|             | TEA021421.1 | 47.53805977 | 58.44955147   | 87.13950661   | 79.01034897   | 63.63781389  |

|             |             |             |             |             |             |
|-------------|-------------|-------------|-------------|-------------|-------------|
| TEA017670.1 | 9.351324472 | 6.439381057 | 10.72772048 | 11.24945174 | 21.70647242 |
| TEA019184.1 | 14.71580911 | 28.51178066 | 24.17424689 | 22.25515769 | 19.77361425 |
| TEA000933.1 | 106.1721217 | 167.9367145 | 115.8115543 | 120.9495902 | 126.4237447 |
| TEA031230.1 | 9.796163951 | 10.94440139 | 4.363310632 | 2.56082981  | 11.94556694 |
| TEA022171.1 | 15.56285918 | 39.20719289 | 47.45799534 | 47.82859418 | 21.87390761 |
| TEA011280.1 | 23.42576566 | 16.28791413 | 11.9340752  | 8.687800951 | 20.84016505 |
| TEA031223.1 | 1.765129862 | 2.119792927 | 3.375016737 | 2.308172311 | 2.679825552 |
| TEA007232.1 | 35.03130242 | 32.03445763 | 19.84464111 | 15.19645328 | 42.76484059 |
| TEA016553.1 | 22.13849719 | 32.98228163 | 19.91892615 | 19.89991625 | 20.7530535  |
| TEA033032.1 | 6.035237302 | 4.686259154 | 4.034151537 | 3.959268547 | 14.57110333 |
| TEA001764.1 | 7.838983007 | 4.947354399 | 4.516451075 | 4.489450709 | 2.202479725 |
| TEA026000.1 | 17.75565979 | 21.38559793 | 25.23728681 | 37.1521342  | 14.02252684 |
| TEA033556.1 | 33.90068625 | 45.68710989 | 29.27805024 | 30.2740439  | 42.83568943 |
| TEA013875.1 | 38.54431602 | 44.93704297 | 37.60008149 | 38.37359965 | 20.93364027 |
| TEA002722.1 | 57.00983074 | 65.66057405 | 70.59435912 | 66.17318251 | 79.07041648 |
| TEA030052.1 | 15.72360191 | 14.98869757 | 27.011303   | 23.59953118 | 26.51966826 |
| TEA008343.1 | 82.93727953 | 124.9005461 | 156.5899552 | 121.0959376 | 51.44544975 |



**Supplementary Table S9:** Expression data of tea MAPKKs under drought stress

| <b>MEKK</b> | <b>Gene</b> | <b>N-0h</b> | <b>PEG-N-24h</b> | <b>PEG-N-48h</b> | <b>PEG-N-72h</b> |
|-------------|-------------|-------------|------------------|------------------|------------------|
|             | TEA028357.1 | 1.969760999 | 1.007381388      | 0.755394409      | 1.762346314      |
|             | TEA025870.1 | 1.359530902 | 0.242087427      | 1.016585514      | 0.398656363      |
|             | TEA016319.1 | 25.72727117 | 42.39527597      | 42.53548502      | 43.89221425      |
|             | TEA008165.1 | 8.655158588 | 8.458566691      | 9.73334579       | 12.38867232      |
|             | TEA027265.1 | 14.65454244 | 16.31446877      | 20.07384967      | 14.20478351      |
|             | TEA006319.1 | 15.83294983 | 44.29714607      | 31.23570374      | 17.36990608      |
|             | TEA006473.1 | 0.393086314 | 0.870839902      | 0.783628993      | 1.12071024       |
|             | TEA014429.1 | 8.288017307 | 11.21299062      | 10.55392409      | 9.167519726      |
|             | TEA031711.1 | 54.80053122 | 31.60098573      | 30.23921131      | 10.74219789      |
|             | TEA001470.1 | 27.05864215 | 71.11695005      | 52.85332582      | 73.92211168      |
|             | TEA017119.1 | 1.054000831 | 1.316463151      | 4.035825978      | 1.081105046      |
|             | TEA005306.1 | 22.91729997 | 109.1272767      | 53.5457457       | 35.37724722      |
|             | TEA009902.1 | 4.134833705 | 85.58677092      | 23.99047618      | 23.68378626      |
|             | TEA029598.1 | 3.366904888 | 22.13577483      | 28.34391434      | 48.66778839      |
|             | TEA005122.1 | 93.71449651 | 315.2021484      | 252.0221097      | 421.7489153      |
|             | TEA028214.1 | 188.5251126 | 237.5176148      | 130.9599842      | 12.21105265      |
|             | TEA031689.1 | 0.15952941  | 0                | 0                | 0                |
| <b>ZIK</b>  | <b>Gene</b> | <b>N-0h</b> | <b>PEG-N-24h</b> | <b>PEG-N-48h</b> | <b>PEG-N-72h</b> |
|             | TEA010125.1 | 63.9128316  | 4.461579293      | 10.97038833      | 2.132174407      |
|             | TEA022762.1 | 64.39365622 | 55.96012156      | 54.26322025      | 72.36055542      |
|             | TEA024720.1 | 246.269942  | 62.77468207      | 55.74536829      | 44.93258652      |
|             | TEA002087.1 | 30.93692137 | 7.633918638      | 11.31252372      | 3.915655465      |
|             | TEA013346.1 | 4.343434751 | 1.588774818      | 1.788523595      | 0.678359439      |
|             | TEA013344.1 | 0           | 0                | 0                | 0                |
|             | TEA031068.1 | 0.27620321  | 0.068879938      | 0.110185237      | 0                |
|             | TEA020698.1 | 2.802401872 | 0.227958209      | 0.911625441      | 0.312565708      |
|             | TEA027328.1 | 0.98741938  | 0.442875901      | 1.259553778      | 0.89190817       |
|             | TEA020112.1 | 171.5901655 | 110.985121       | 106.6031785      | 34.95984101      |
|             | TEA033250.1 | 9.210945403 | 17.29668832      | 13.79246755      | 20.44711689      |
| <b>Raf</b>  | <b>Gene</b> | <b>N-0h</b> | <b>PEG-N-24h</b> | <b>PEG-N-48h</b> | <b>PEG-N-72h</b> |
|             | TEA001765.1 | 3.479068628 | 3.006349474      | 3.976947511      | 2.380472729      |
|             | TEA002020.1 | 1.056631461 | 1.739429596      | 1.880200899      | 1.200808726      |
|             | TEA000256.1 | 11.29211034 | 24.95718171      | 20.02247495      | 25.15743077      |
|             | TEA029086.1 | 4.191646704 | 5.259402309      | 6.56171601       | 6.211858639      |
|             | TEA022129.1 | 7.034031279 | 16.74847011      | 13.89572314      | 11.39060946      |
|             | TEA019143.1 | 8.593743779 | 4.957694587      | 6.472759289      | 5.879021339      |
|             | TEA028452.1 | 0.663591021 | 0.251483016      | 0.25864135       | 0.177716458      |
|             | TEA016969.1 | 15.1300628  | 8.865742995      | 12.76067081      | 8.601691326      |
|             | TEA013270.1 | 2.514365846 | 1.871791473      | 2.271749664      | 1.117706671      |

|             |             |             |             |             |
|-------------|-------------|-------------|-------------|-------------|
| TEA026716.1 | 7.509078552 | 4.637750846 | 6.713435936 | 5.628268273 |
| TEA028758.1 | 0.316071227 | 0.295140252 | 0.314786581 | 0.216328778 |
| TEA010804.1 | 4.116971228 | 11.54352558 | 7.037982449 | 3.659583787 |
| TEA009451.1 | 4.9105899   | 7.049501419 | 7.643457577 | 7.603418912 |
| TEA021421.1 | 42.22368444 | 19.76224823 | 26.06786236 | 16.52631245 |
| TEA017670.1 | 10.41236184 | 8.059421971 | 8.72159279  | 8.636995729 |
| TEA019184.1 | 16.86083074 | 3.519494913 | 2.68398751  | 0.875098165 |
| TEA000933.1 | 178.127316  | 262.5292884 | 260.4407308 | 247.6477156 |
| TEA031230.1 | 1.541118894 | 0.845792962 | 1.168463614 | 0.442777886 |
| TEA022171.1 | 43.19522543 | 97.82435736 | 52.46447232 | 49.51317817 |
| TEA011280.1 | 9.573341516 | 4.283269017 | 5.006896779 | 9.009747561 |
| TEA031223.1 | 1.126609076 | 0.858800489 | 1.061540925 | 1.798229478 |
| TEA007232.1 | 59.64117648 | 53.60036014 | 80.18619578 | 131.9165291 |
| TEA016553.1 | 25.89901473 | 53.85962333 | 33.02546742 | 29.73582711 |
| TEA033032.1 | 6.710212956 | 5.146129665 | 3.697271629 | 4.016000597 |
| TEA001764.1 | 1.349088665 | 0.801414477 | 0.833271399 | 0.659170528 |
| TEA026000.1 | 5.510602832 | 5.2013269   | 8.372396535 | 8.920418839 |
| TEA033556.1 | 30.56017507 | 36.12756853 | 50.80668854 | 77.62208897 |
| TEA013875.1 | 30.58856006 | 14.52658801 | 31.55280978 | 33.71331019 |
| TEA002722.1 | 34.72574485 | 28.62156368 | 36.60689285 | 36.3817962  |
| TEA030052.1 | 18.6624178  | 28.49437797 | 37.62173339 | 78.31829819 |
| TEA008343.1 | 80.76821471 | 38.7553528  | 68.40607351 | 18.73308712 |

**Supplementary Table S10:** Expression data of tea MAPKKs under salt stress

| <b>MEKK</b> | <b>Gene</b> | <b>N-0h</b> | <b>NaCl-N-24h</b> | <b>NaCl-N-48h</b> | <b>NaCl-N-72h</b> |
|-------------|-------------|-------------|-------------------|-------------------|-------------------|
|             | TEA028357.1 | 1.969755742 | 1.014062774       | 1.381679455       | 0.559062736       |
|             | TEA025870.1 | 1.359530422 | 0.324980117       | 0.581132907       | 0.268773073       |
|             | TEA016319.1 | 25.72724067 | 34.69530182       | 34.58511306       | 19.27636458       |
|             | TEA008165.1 | 8.655145753 | 21.32454464       | 13.51012975       | 6.252564685       |
|             | TEA027265.1 | 14.65449931 | 23.07523008       | 15.00398821       | 7.576675511       |
|             | TEA006319.1 | 15.83303294 | 31.89324732       | 20.68181694       | 14.86963468       |
|             | TEA006473.1 | 0.39308625  | 0.162434187       | 0.522774756       | 0.172764494       |
|             | TEA014429.1 | 8.2880152   | 8.174044487       | 8.557338026       | 5.103081623       |
|             | TEA031711.1 | 54.80064905 | 45.50419113       | 31.83294847       | 9.582807161       |
|             | TEA001470.1 | 27.05851483 | 68.69865495       | 59.44146826       | 46.30786188       |
|             | TEA017119.1 | 1.054001329 | 2.609057914       | 0.450340554       | 1.453704651       |
|             | TEA005306.1 | 22.91733926 | 57.71466026       | 39.75845275       | 59.36188402       |
|             | TEA009902.1 | 4.134827152 | 6.362870333       | 15.85473173       | 41.44379162       |
|             | TEA029598.1 | 3.366901976 | 20.95456391       | 16.33092471       | 35.5458555        |
|             | TEA005122.1 | 93.714391   | 48.41995361       | 288.4361818       | 606.34795         |
|             | TEA028214.1 | 188.5246115 | 50.80376902       | 144.3694997       | 41.68165584       |
|             | TEA031689.1 | 0.159530122 | 0                 | 0                 | 0                 |
| <b>ZIK</b>  | <b>Gene</b> | <b>N-0h</b> | <b>NaCl-N-24h</b> | <b>NaCl-N-48h</b> | <b>NaCl-N-72h</b> |
|             | TEA010125.1 | 63.91280784 | 14.89255311       | 9.560445924       | 2.517514419       |
|             | TEA022762.1 | 64.39359831 | 97.8907851        | 70.79303025       | 49.01031994       |
|             | TEA024720.1 | 246.2689738 | 75.34516899       | 39.01729443       | 51.00146277       |
|             | TEA002087.1 | 30.93687186 | 15.37034767       | 17.37018455       | 4.520938466       |
|             | TEA013346.1 | 4.343436632 | 3.862277064       | 2.946402181       | 2.875044586       |
|             | TEA013344.1 | 0           | 0                 | 0                 | 0                 |
|             | TEA031068.1 | 0.276204077 | 0.246428285       | 0.188888641       | 0.305609131       |
|             | TEA020698.1 | 2.802402712 | 0.724572809       | 0.833203682       | 0.096249817       |
|             | TEA027328.1 | 0.987420149 | 1.380974858       | 0.810462582       | 0.500123019       |
|             | TEA020112.1 | 171.5906529 | 23.45319246       | 32.57249342       | 48.77785406       |
|             | TEA033250.1 | 9.210952349 | 5.895378257       | 7.948215595       | 12.71063731       |
| <b>Raf</b>  | <b>Gene</b> | <b>N-0h</b> | <b>NaCl-N-24h</b> | <b>NaCl-N-48h</b> | <b>NaCl-N-72h</b> |
|             | TEA001765.1 | 3.479076711 | 3.864008471       | 3.489897599       | 2.054607029       |
|             | TEA002020.1 | 1.056632427 | 1.993327958       | 2.000444887       | 0.418171204       |
|             | TEA000256.1 | 11.29211112 | 18.58879933       | 20.52457522       | 10.95778044       |
|             | TEA029086.1 | 4.191642549 | 7.43439002        | 6.090318338       | 3.419365645       |
|             | TEA022129.1 | 7.034043184 | 9.834193319       | 7.876966601       | 7.949337891       |
|             | TEA019143.1 | 8.593743773 | 25.12000905       | 15.6415184        | 6.374305617       |
|             | TEA028452.1 | 0.663591315 | 0.386491715       | 0.246708174       | 0.068562337       |
|             | TEA016969.1 | 15.13004797 | 13.90282704       | 15.27714452       | 5.467393451       |
|             | TEA013270.1 | 2.514365249 | 2.64313347        | 1.99490978        | 1.170663099       |

|             |             |             |             |             |
|-------------|-------------|-------------|-------------|-------------|
| TEA026716.1 | 7.509227828 | 7.870999205 | 4.498652299 | 2.242578807 |
| TEA028758.1 | 0.316070955 | 0.470489497 | 0.382891672 | 0.08347364  |
| TEA010804.1 | 4.116975877 | 3.872112928 | 3.987014775 | 2.450785914 |
| TEA009451.1 | 4.910600483 | 5.631946577 | 7.640955084 | 4.018015904 |
| TEA021421.1 | 42.2236538  | 23.40972311 | 23.336931   | 8.438106689 |
| TEA017670.1 | 10.41237522 | 31.36375615 | 13.61673641 | 4.624932366 |
| TEA019184.1 | 16.86086454 | 5.266042637 | 4.261821685 | 0.932486788 |
| TEA000933.1 | 178.1268988 | 243.0538836 | 211.7426775 | 219.444926  |
| TEA031230.1 | 1.541106723 | 1.374650926 | 1.211927889 | 0.389542305 |
| TEA022171.1 | 43.19528154 | 41.40395002 | 62.98542624 | 76.15551971 |
| TEA011280.1 | 9.573350712 | 3.582010217 | 5.530391346 | 17.51633805 |
| TEA031223.1 | 1.126609135 | 0.790883228 | 0.588496089 | 0.395481319 |
| TEA007232.1 | 59.64116945 | 47.14411566 | 64.69696582 | 46.51924051 |
| TEA016553.1 | 25.89890995 | 42.92267609 | 48.54748342 | 35.69844286 |
| TEA033032.1 | 6.710215806 | 5.349948323 | 4.122202946 | 4.248339322 |
| TEA001764.1 | 1.349089028 | 1.050462836 | 0.768761877 | 0.761002711 |
| TEA026000.1 | 5.510598449 | 3.338446735 | 4.339623452 | 2.233907729 |
| TEA033556.1 | 30.56018956 | 55.4215902  | 47.57958427 | 71.4634371  |
| TEA013875.1 | 30.5885827  | 30.58339521 | 22.56127133 | 33.03352011 |
| TEA002722.1 | 34.72582691 | 33.82542347 | 29.02133733 | 17.10893231 |
| TEA030052.1 | 18.66244554 | 12.84224837 | 24.23905421 | 19.03251158 |
| TEA008343.1 | 80.76828496 | 70.0572566  | 61.09505056 | 33.26337117 |

**Supplementary Table S11:** Expression data of tea MAPKKs under MeJA treatment

| <b>MEKK</b> | <b>Gene</b> | <b>CK</b>   | <b>12h_MeJA</b> | <b>24h_MeJA</b> | <b>48h_MeJA</b> |
|-------------|-------------|-------------|-----------------|-----------------|-----------------|
|             | TEA028357.1 | 8.048422021 | 3.56286023      | 2.839287487     | 5.528577132     |
|             | TEA025870.1 | 14.53557989 | 12.25822641     | 9.139104694     | 6.828215876     |
|             | TEA016319.1 | 42.74652531 | 19.67998631     | 20.07019515     | 38.89322812     |
|             | TEA008165.1 | 32.26873397 | 27.84660988     | 28.56353058     | 22.23714971     |
|             | TEA027265.1 | 44.69974942 | 41.30224131     | 64.1161308      | 24.63706572     |
|             | TEA006319.1 | 32.08544754 | 24.48233954     | 20.00415114     | 23.26617171     |
|             | TEA006473.1 | 11.93705767 | 1.05795052      | 1.052881437     | 14.04771839     |
|             | TEA014429.1 | 23.90115051 | 16.04747595     | 16.78526183     | 12.45573579     |
|             | TEA031711.1 | 26.30102086 | 31.12006087     | 25.97231146     | 23.89882652     |
|             | TEA001470.1 | 37.48249226 | 26.73502849     | 27.10274797     | 31.49139386     |
|             | TEA017119.1 | 6.019369596 | 0.984618838     | 2.555600732     | 14.67466825     |
|             | TEA005306.1 | 15.35347688 | 11.51450952     | 12.04431015     | 17.40368396     |
|             | TEA009902.1 | 4.58197777  | 6.495389355     | 5.997754084     | 5.179424903     |
|             | TEA029598.1 | 7.099960497 | 6.254316048     | 15.07757041     | 13.49690567     |
|             | TEA005122.1 | 7.0569606   | 9.473209524     | 15.76876384     | 26.24268631     |
|             | TEA028214.1 | 48.69725821 | 11.82583931     | 19.10146563     | 256.8482043     |
|             | TEA031689.1 | 0           | 0               | 0               | 0.100254359     |
| <b>ZIK</b>  | <b>Gene</b> | <b>CK</b>   | <b>12h_MeJA</b> | <b>24h_MeJA</b> | <b>48h_MeJA</b> |
|             | TEA010125.1 | 8.156196443 | 38.02219965     | 43.28353065     | 1.263135498     |
|             | TEA022762.1 | 6.926163005 | 15.89536342     | 27.1926132      | 5.395674208     |
|             | TEA024720.1 | 10.77133263 | 10.09665998     | 7.120514873     | 10.61570085     |
|             | TEA002087.1 | 38.46817708 | 30.09573988     | 25.09369924     | 42.59109409     |
|             | TEA013346.1 | 3.503068243 | 1.846216342     | 1.508299006     | 3.809808121     |
|             | TEA013344.1 | 0.092411156 | 0.428701603     | 0.48522434      | 0.048939781     |
|             | TEA031068.1 | 0.298983293 | 0.085973366     | 0.251785229     | 0.165275039     |
|             | TEA020698.1 | 7.383813086 | 7.270780974     | 8.35369772      | 6.902720985     |
|             | TEA027328.1 | 7.386360119 | 3.56494288      | 3.534892251     | 6.065113259     |
|             | TEA020112.1 | 25.26755837 | 17.70805965     | 17.50846896     | 41.13476756     |
|             | TEA033250.1 | 13.00388128 | 14.40139171     | 15.9260595      | 12.02644445     |
| <b>Raf</b>  | <b>Gene</b> | <b>CK</b>   | <b>12h_MeJA</b> | <b>24h_MeJA</b> | <b>48h_MeJA</b> |
|             | TEA001765.1 | 13.87568213 | 10.02475583     | 11.85419415     | 9.840038798     |
|             | TEA002020.1 | 1.712671071 | 2.110198798     | 1.648239207     | 1.263105696     |
|             | TEA000256.1 | 26.49629333 | 20.82003937     | 21.90757987     | 19.02633429     |
|             | TEA029086.1 | 13.96587703 | 10.83302168     | 11.25124006     | 10.42677008     |
|             | TEA022129.1 | 9.896268919 | 7.089274088     | 7.826832884     | 8.583286614     |
|             | TEA019143.1 | 26.93195236 | 24.88713812     | 25.46525982     | 22.62982712     |
|             | TEA028452.1 | 2.577813013 | 2.714773587     | 2.839589979     | 1.680395331     |
|             | TEA016969.1 | 42.36746698 | 35.87206143     | 39.54322136     | 33.8250358      |
|             | TEA013270.1 | 8.491189444 | 5.463027747     | 4.812264087     | 5.51181703      |
|             | TEA026716.1 | 22.30650857 | 17.24486778     | 19.28661573     | 17.50046965     |

|             |             |             |             |             |
|-------------|-------------|-------------|-------------|-------------|
| TEA028758.1 | 3.306630465 | 1.646664218 | 1.446754558 | 2.637367338 |
| TEA010804.1 | 4.932669147 | 6.721488674 | 7.36470126  | 5.256966982 |
| TEA009451.1 | 16.8122438  | 11.32127125 | 18.32128924 | 9.521412376 |
| TEA021421.1 | 84.08585693 | 56.06071519 | 62.36407394 | 48.69497839 |
| TEA017670.1 | 23.18332025 | 12.39491678 | 11.31023853 | 18.27787725 |
| TEA019184.1 | 11.30446143 | 7.682143858 | 9.8064643   | 7.001152878 |
| TEA000933.1 | 150.7615002 | 134.3902295 | 130.9309913 | 164.4405816 |
| TEA031230.1 | 7.005254181 | 7.099977326 | 4.797681469 | 6.177779176 |
| TEA022171.1 | 16.11006197 | 16.65500335 | 14.60215437 | 18.1197845  |
| TEA011280.1 | 24.74133819 | 35.5889265  | 30.11858975 | 18.35323384 |
| TEA031223.1 | 3.494727961 | 2.401558872 | 2.076592595 | 2.57736589  |
| TEA007232.1 | 44.69225815 | 47.60990219 | 41.35577655 | 78.45756989 |
| TEA016553.1 | 23.15152397 | 22.54376163 | 21.88627941 | 22.50210407 |
| TEA033032.1 | 7.499428372 | 8.48843251  | 7.115448138 | 6.811526732 |
| TEA001764.1 | 0.520881405 | 0.929503751 | 0.52997672  | 0.382455304 |
| TEA026000.1 | 17.83388672 | 17.07377414 | 20.57573432 | 8.066093432 |
| TEA033556.1 | 44.57988908 | 29.8974927  | 31.49656527 | 38.19217052 |
| TEA013875.1 | 13.70674564 | 15.18502166 | 14.93325669 | 10.34702833 |
| TEA002722.1 | 87.76740055 | 66.08419243 | 72.90061445 | 52.86485197 |
| TEA030052.1 | 51.20533581 | 40.34527689 | 45.85168479 | 30.4362596  |
| TEA008343.1 | 36.005713   | 50.8398548  | 61.96503704 | 34.75187936 |
