# Supplementary material for: In-silico genome wide analysis of Mitogen activated protein kinase kinase kinase gene family in C. sinensis
Source: PubMed Central journal article supplement (PMC8568164; doi:10.1371/journal.pone.0258657), 2021-11-04
Supplement: pone.0258657.s007.pdf [file pone.0258657.s007.pdf]

# **TEA028357.1** Length: 628  
 # TEA028357.1 Number of predicted TMHs: 0  
 # TEA028357.1 Exp number of AAs in TMHs: 0.02198  
 # TEA028357.1 Exp number, first 60 AAs: 0.00018  
 # TEA028357.1 Total prob of N-in: 0.00262  
 TEA028357.1 TMHMM2.0 outside 1 628

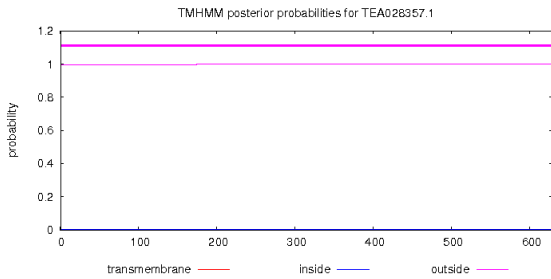

# **TEA025870.1** Length: 776  
 # TEA025870.1 Number of predicted TMHs: 0  
 # TEA025870.1 Exp number of AAs in TMHs: 0.19882  
 # TEA025870.1 Exp number, first 60 AAs: 0.00141  
 # TEA025870.1 Total prob of N-in: 0.00426  
 TEA025870.1 TMHMM2.0 outside 1 776

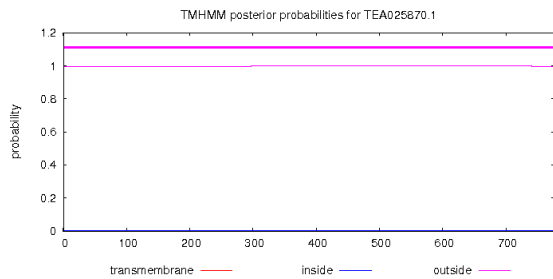

# **TEA016319.1** Length: 627  
 # TEA016319.1 Number of predicted TMHs: 0  
 # TEA016319.1 Exp number of AAs in TMHs: 0.11408  
 # TEA016319.1 Exp number, first 60 AAs: 3e-05  
 # TEA016319.1 Total prob of N-in: 0.00653  
 TEA016319.1 TMHMM2.0 outside 1 627

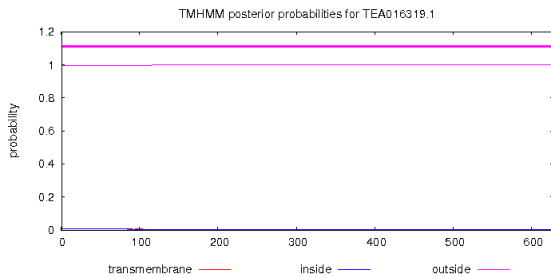

# **TEA029598.1** Length: 423  
 # TEA029598.1 Number of predicted TMHs: 0  
 # TEA029598.1 Exp number of AAs in TMHs: 0.02545  
 # TEA029598.1 Exp number, first 60 AAs: 0.00568  
 # TEA029598.1 Total prob of N-in: 0.01343  
 TEA029598.1 TMHMM2.0 outside 1 423

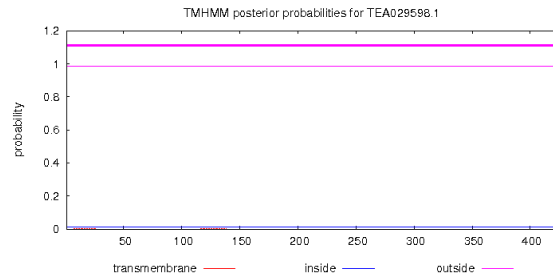

# **TEA008165.1** Length: 1032  
 # TEA008165.1 Number of predicted TMHs: 0  
 # TEA008165.1 Exp number of AAs in TMHs: 6.76661  
 # TEA008165.1 Exp number, first 60 AAs: 3.17779  
 # TEA008165.1 Total prob of N-in: 0.04338  
 TEA008165.1 TMHMM2.0 outside 1 1032

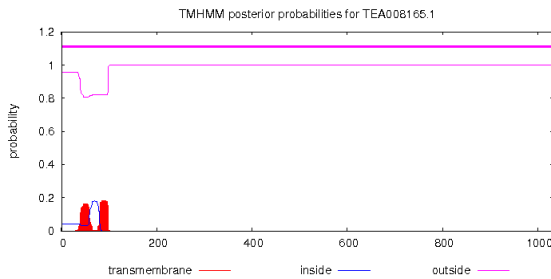

# **TEA027265.1** Length: 939  
 # TEA027265.1 Number of predicted TMHs: 0  
 # TEA027265.1 Exp number of AAs in TMHs: 0  
 # TEA027265.1 Exp number, first 60 AAs: 0  
 # TEA027265.1 Total prob of N-in: 0.00001  
 TEA027265.1 TMHMM2.0 outside 1 939

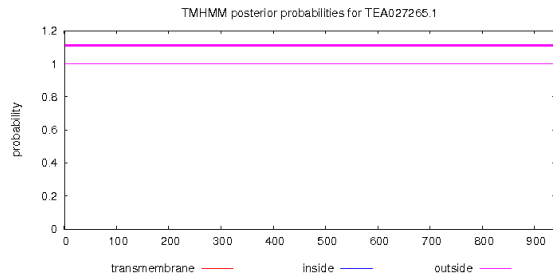

# **TEA006319.1** Length: 683  
 # TEA006319.1 Number of predicted TMHs: 0  
 # TEA006319.1 Exp number of AAs in TMHs: 0.00042  
 # TEA006319.1 Exp number, first 60 AAs: 0  
 # TEA006319.1 Total prob of N-in: 0.00017  
 TEA006319.1 TMHMM2.0 outside 1 683

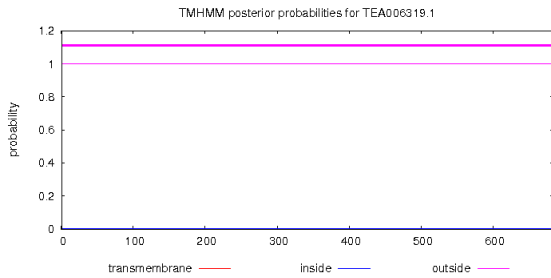

# **TEA006473.1** Length: 710  
 # TEA006473.1 Number of predicted TMHs: 0  
 # TEA006473.1 Exp number of AAs in TMHs: 0.00515  
 # TEA006473.1 Exp number, first 60 AAs: 0  
 # TEA006473.1 Total prob of N-in: 0.00031  
 TEA006473.1 TMHMM2.0 outside 1 710

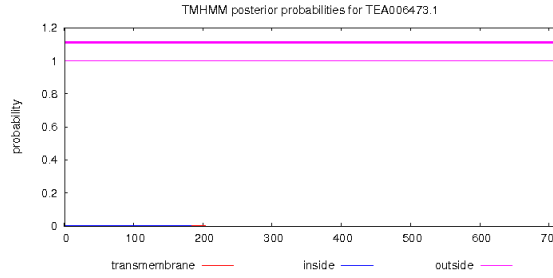

# **TEA014429.1** Length: 1191  
 # TEA014429.1 Number of predicted TMHs: 0  
 # TEA014429.1 Exp number of AAs in TMHs: 0.02164  
 # TEA014429.1 Exp number, first 60 AAs: 0.00074  
 # TEA014429.1 Total prob of N-in: 0.00023  
 TEA014429.1 TMHMM2.0 outside 1 1191

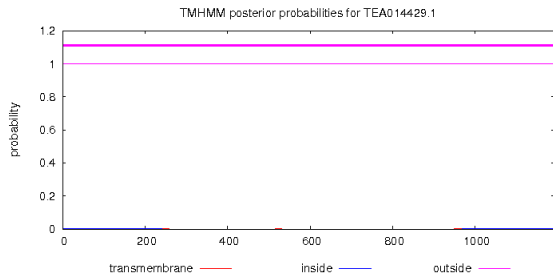

# **TEA031711.1** Length: 562  
 # TEA031711.1 Number of predicted TMHs: 0  
 # TEA031711.1 Exp number of AAs in TMHs: 0.0069899  
 # TEA031711.1 Exp number, first 60 AAs: 0.00016  
 # TEA031711.1 Total prob of N-in: 0.00833  
 TEA031711.1 TMHMM2.0 outside 1 562

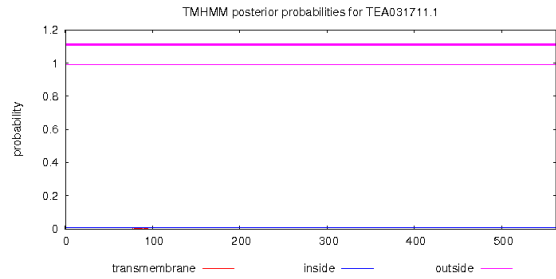

† **TEA001470.1** Length: 789  
 # TEA001470.1 Number of predicted TMHs: 0  
 # TEA001470.1 Exp number of AAs in TMHs: 3.06197  
 # TEA001470.1 Exp number, first 60 AAs: 0.21965  
 # TEA001470.1 Total prob of N-in: 0.01032  
 TEA001470.1 TMHMM2.0 outside 1 789

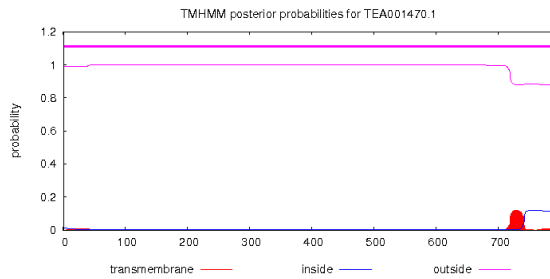

† **TEA017119.1** Length: 506  
 # TEA017119.1 Number of predicted TMHs: 0  
 # TEA017119.1 Exp number of AAs in TMHs: 0.04644  
 # TEA017119.1 Exp number, first 60 AAs: 0.00226  
 # TEA017119.1 Total prob of N-in: 0.01372  
 TEA017119.1 TMHMM2.0 outside 1 506

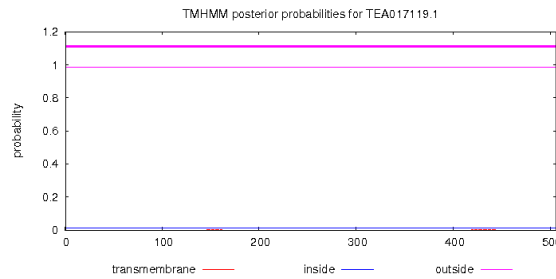

† **TEA005306.1** Length: 1097  
 # TEA005306.1 Number of predicted TMHs: 0  
 # TEA005306.1 Exp number of AAs in TMHs: 0.03434  
 # TEA005306.1 Exp number, first 60 AAs: 0  
 # TEA005306.1 Total prob of N-in: 0.00020  
 TEA005306.1 TMHMM2.0 outside 1 1097

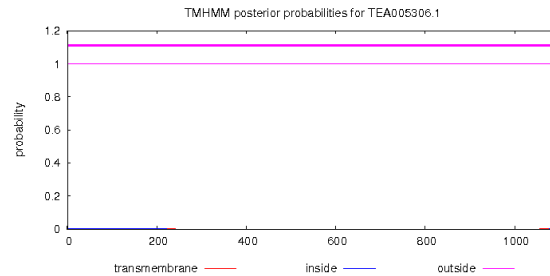

† **TEA009902.1** Length: 450  
 # TEA009902.1 Number of predicted TMHs: 0  
 # TEA009902.1 Exp number of AAs in TMHs: 0.71758  
 # TEA009902.1 Exp number, first 60 AAs: 0.10658  
 # TEA009902.1 Total prob of N-in: 0.00748  
 TEA009902.1 TMHMM2.0 outside 1 450

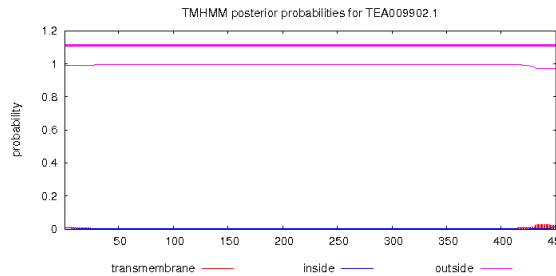

† **TEA005122.1** Length: 334  
 # TEA005122.1 Number of predicted TMHs: 0  
 # TEA005122.1 Exp number of AAs in TMHs: 0.01241  
 # TEA005122.1 Exp number, first 60 AAs: 0.00929  
 # TEA005122.1 Total prob of N-in: 0.04268  
 TEA005122.1 TMHMM2.0 outside 1 334

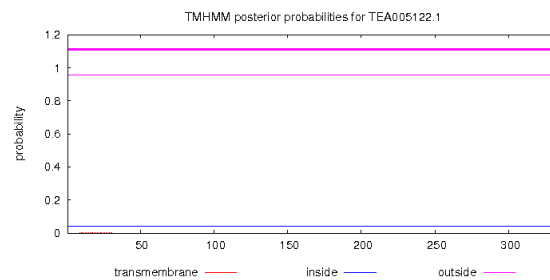

† **TEA028214.1** Length: 344  
 # TEA028214.1 Number of predicted TMHs: 0  
 # TEA028214.1 Exp number of AAs in TMHs: 0.00766  
 # TEA028214.1 Exp number, first 60 AAs: 0.00225  
 # TEA028214.1 Total prob of N-in: 0.02030  
 TEA028214.1 TMHMM2.0 outside 1 344

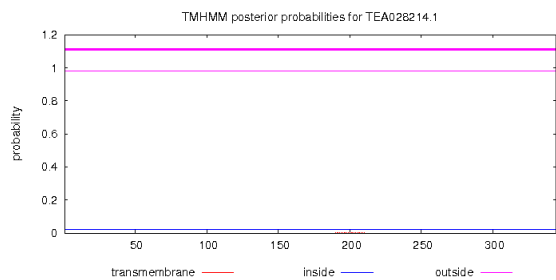

```
# TEA031689.1 Length: 311
# TEA031689.1 Number of predicted TMHs: 0
# TEA031689.1 Exp number of AAs in TMHs: 0.28379
# TEA031689.1 Exp number, first 60 AAs: 0.25957
# TEA031689.1 Total prob of N-in: 0.04973
TEA031689.1 TMHMM2.0 outside 1 311
```

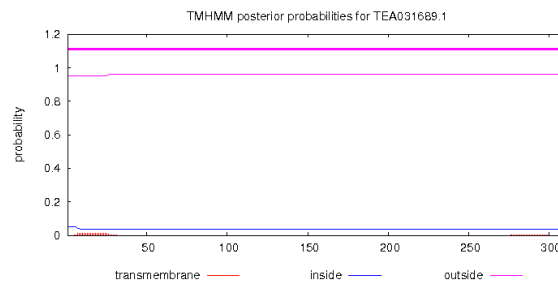

**Supplementary Figure S1: Transmembrane helices of MAPKKKs of MEKK subfamily in *C. sinensis*.** TMHMM Server, v.2.0 (<http://www.cbs.dtu.dk/services/TMHMM/>), was used to generate the transmembrane helices.

# **TEA001765.1** Length: 842  
 # TEA001765.1 Number of predicted TMHs: 0  
 # TEA001765.1 Exp number of AAs in TMHs: 1.26294  
 # TEA001765.1 Exp number, first 60 AAs: 0  
 # TEA001765.1 Total prob of N-in: 0.00418  
 TEA001765.1 TMHMM2.0 outside 1 842

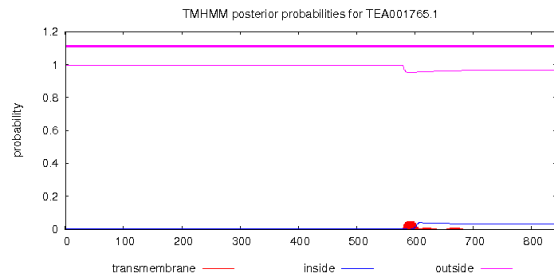

# **TEA002020.1** Length: 896  
 # TEA002020.1 Number of predicted TMHs: 0  
 # TEA002020.1 Exp number of AAs in TMHs: 0.01584  
 # TEA002020.1 Exp number, first 60 AAs: 0  
 # TEA002020.1 Total prob of N-in: 0.00015  
 TEA002020.1 TMHMM2.0 outside 1 896

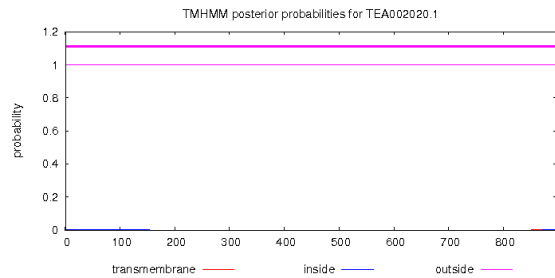

# **TEA000256.1** Length: 1086  
 # TEA000256.1 Number of predicted TMHs: 0  
 # TEA000256.1 Exp number of AAs in TMHs: 0.00826  
 # TEA000256.1 Exp number, first 60 AAs: 0  
 # TEA000256.1 Total prob of N-in: 0.00004  
 TEA000256.1 TMHMM2.0 outside 1 1086

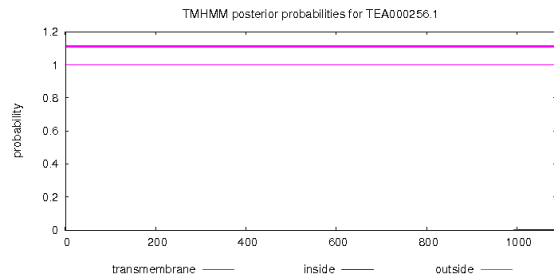

# **TEA029086.1** Length: 919  
 # TEA029086.1 Number of predicted TMHs: 0  
 # TEA029086.1 Exp number of AAs in TMHs: 0.27701  
 # TEA029086.1 Exp number, first 60 AAs: 0  
 # TEA029086.1 Total prob of N-in: 0.00050  
 TEA029086.1 TMHMM2.0 outside 1 919

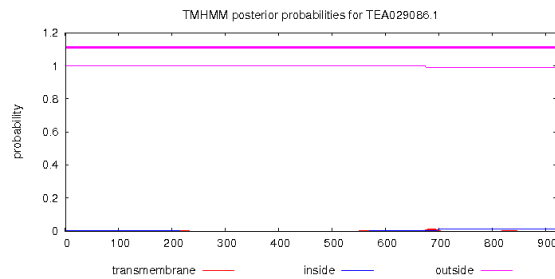

# **TEA022129.1** Length: 940  
 # TEA022129.1 Number of predicted TMHs: 0  
 # TEA022129.1 Exp number of AAs in TMHs: 37.32592  
 # TEA022129.1 Exp number, first 60 AAs: 0  
 # TEA022129.1 Total prob of N-in: 0.17108  
 TEA022129.1 TMHMM2.0 outside 1 940

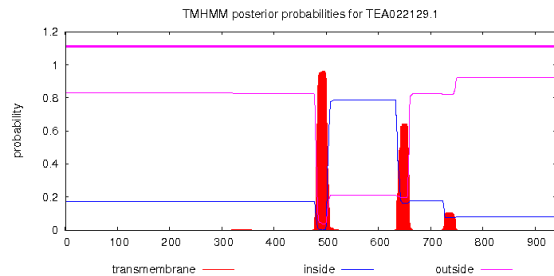

# **TEA019143.1** Length: 724  
 # TEA019143.1 Number of predicted TMHs: 0  
 # TEA019143.1 Exp number of AAs in TMHs: 0.01226  
 # TEA019143.1 Exp number, first 60 AAs: 0  
 # TEA019143.1 Total prob of N-in: 0.00005  
 TEA019143.1 TMHMM2.0 outside 1 724

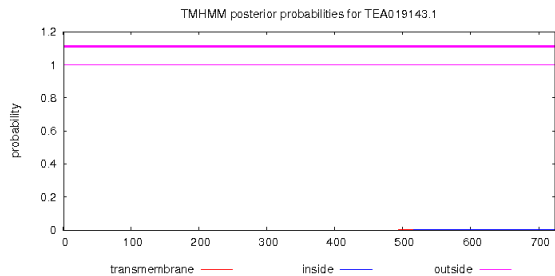

† **TEA028452.1** Length: 846  
 # TEA028452.1 Number of predicted TMHs: 0  
 # TEA028452.1 Exp number of AAs in TMHs: 0.05099  
 # TEA028452.1 Exp number, first 60 AAs: 0  
 # TEA028452.1 Total prob of N-in: 0.00001  
 TEA028452.1 TMHMM2.0 outside 1 846

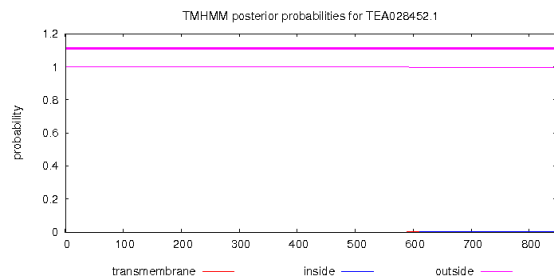

† **TEA016969.1** Length: 1107  
 # TEA016969.1 Number of predicted TMHs: 0  
 # TEA016969.1 Exp number of AAs in TMHs: 6.33735  
 # TEA016969.1 Exp number, first 60 AAs: 0  
 # TEA016969.1 Total prob of N-in: 0.27806  
 TEA016969.1 TMHMM2.0 outside 1 1107

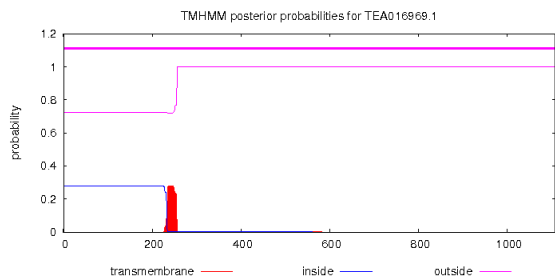

# **TEA013270.1** Length: 755  
 # TEA013270.1 Number of predicted TMHs: 0  
 # TEA013270.1 Exp number of AAs in TMHs: 0.10844  
 # TEA013270.1 Exp number, first 60 AAs: 0  
 # TEA013270.1 Total prob of N-in: 0.00501  
 TEA013270.1 TMHMM2.0 outside 1 755

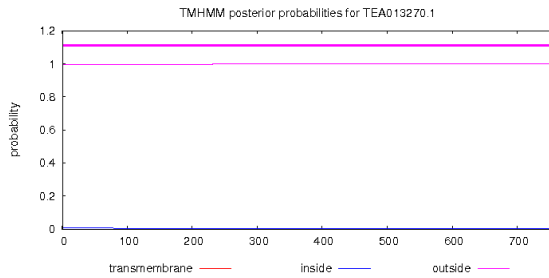

# **TEA026716.1** Length: 368  
 # TEA026716.1 Number of predicted TMHs: 0  
 # TEA026716.1 Exp number of AAs in TMHs: 0.00933  
 # TEA026716.1 Exp number, first 60 AAs: 0.00015  
 # TEA026716.1 Total prob of N-in: 0.02057  
 TEA026716.1 TMHMM2.0 outside 1 368

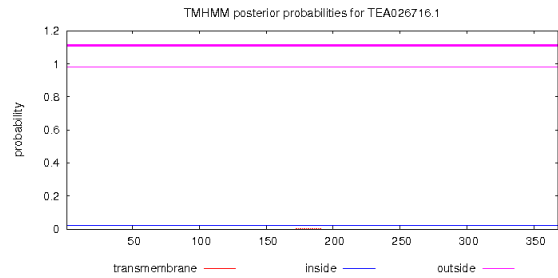

# **TEA028758.1** Length: 1213  
 # TEA028758.1 Number of predicted TMHs: 0  
 # TEA028758.1 Exp number of AAs in TMHs: 0.0185  
 # TEA028758.1 Exp number, first 60 AAs: 0.00018  
 # TEA028758.1 Total prob of N-in: 0.00001  
 TEA028758.1 TMHMM2.0 outside 1 1213

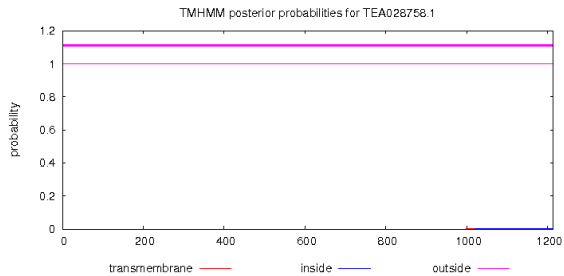

# **TEA010804.1** Length: 305  
 # TEA010804.1 Number of predicted TMHs: 0  
 # TEA010804.1 Exp number of AAs in TMHs: 0.00132  
 # TEA010804.1 Exp number, first 60 AAs: 0  
 # TEA010804.1 Total prob of N-in: 0.01241  
 TEA010804.1 TMHMM2.0 outside 1 305

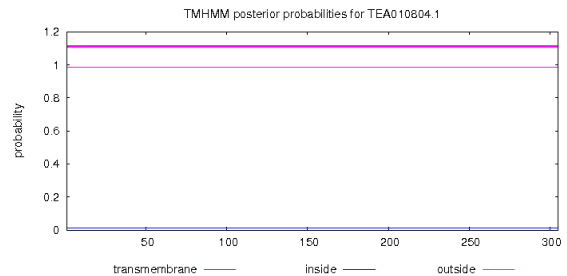

† **TEA009451.1** Length: 1333  
 # TEA009451.1 Number of predicted TMHs: 0  
 # TEA009451.1 Exp number of AAs in TMHs: 0.02716  
 # TEA009451.1 Exp number, first 60 AAs: 0.02022  
 # TEA009451.1 Total prob of N-in: 0.00132  
 TEA009451.1 TMHMM2.0 outside 1 1333

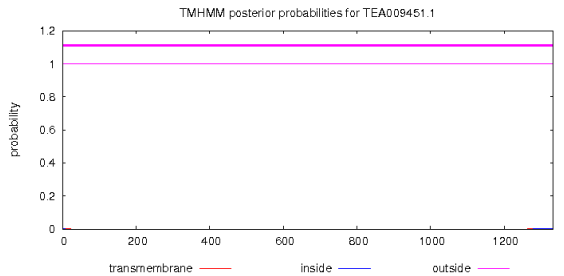

† **TEA021421.1** Length: 1331  
 # TEA021421.1 Number of predicted TMHs: 0  
 # TEA021421.1 Exp number of AAs in TMHs: 0.01119  
 # TEA021421.1 Exp number, first 60 AAs: 0  
 # TEA021421.1 Total prob of N-in: 0.00001  
 TEA021421.1 TMHMM2.0 outside 1 1331

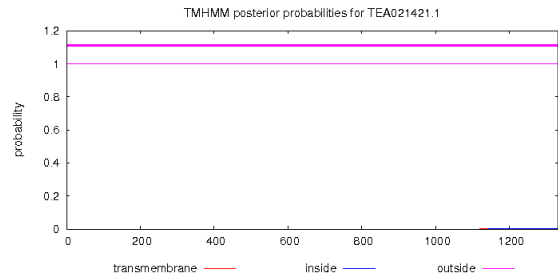

# **TEA017670.1** Length: 561  
 # TEA017670.1 Number of predicted TMHs: 0  
 # TEA017670.1 Exp number of AAs in TMHs: 0.03517  
 # TEA017670.1 Exp number, first 60 AAs: 0  
 # TEA017670.1 Total prob of N-in: 0.00270  
 TEA017670.1 TMHMM2.0 outside 1 561

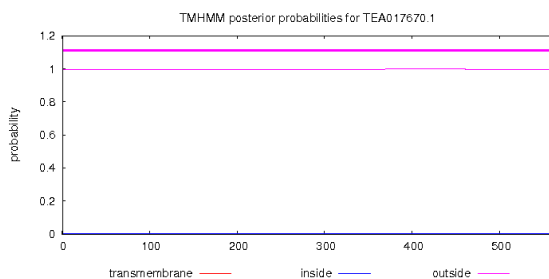

# **TEA019184.1** Length: 601  
 # TEA019184.1 Number of predicted TMHs: 0  
 # TEA019184.1 Exp number of AAs in TMHs: 0.01866  
 # TEA019184.1 Exp number, first 60 AAs: 0  
 # TEA019184.1 Total prob of N-in: 0.00147  
 TEA019184.1 TMHMM2.0 outside 1 601

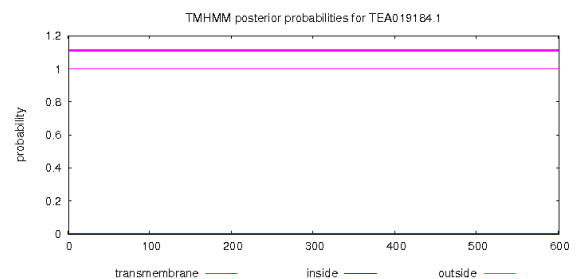

‡ **TEA000933.1** Length: 407  
 # TEA000933.1 Number of predicted TMHs: 0  
 # TEA000933.1 Exp number of AAs in TMHs: 0.46154  
 # TEA000933.1 Exp number, first 60 AAs: 0  
 # TEA000933.1 Total prob of N-in: 0.00794  
 TEA000933.1 TMHMM2.0 outside 1 407

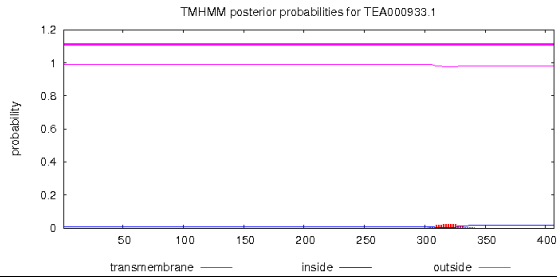

# **TEA031230.1** Length: 489  
 # TEA031230.1 Number of predicted TMHs: 0  
 # TEA031230.1 Exp number of AAs in TMHs: 0.13166  
 # TEA031230.1 Exp number, first 60 AAs: 0.00013  
 # TEA031230.1 Total prob of N-in: 0.00470  
 TEA031230.1 TMHMM2.0 outside 1 489

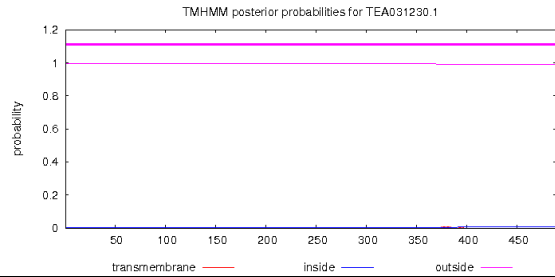

† **TEA022171.1** Length: 404  
 # TEA022171.1 Number of predicted TMHs: 0  
 # TEA022171.1 Exp number of AAs in TMHs: 0.01418  
 # TEA022171.1 Exp number, first 60 AAs: 0  
 # TEA022171.1 Total prob of N-in: 0.01930  
 TEA022171.1 TMHMM2.0 outside 1 404

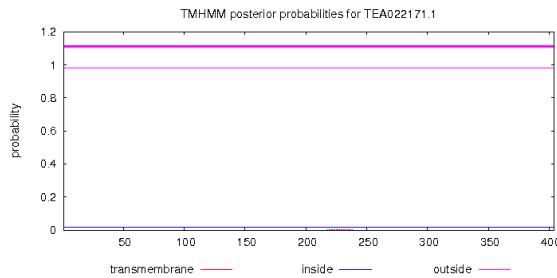

† **TEA011280.1** Length: 368  
 # TEA011280.1 Number of predicted TMHs: 0  
 # TEA011280.1 Exp number of AAs in TMHs: 0.0076  
 # TEA011280.1 Exp number, first 60 AAs: 0  
 # TEA011280.1 Total prob of N-in: 0.00291  
 TEA011280.1 TMHMM2.0 outside 1 368

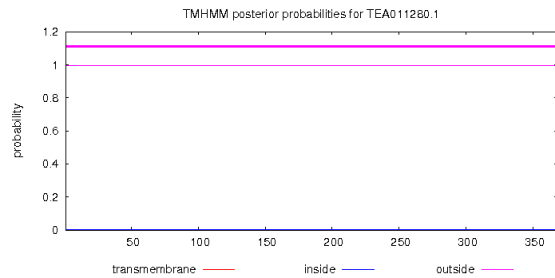

‡ **TEA031223.1** Length: 434  
 # TEA031223.1 Number of predicted TMHs: 0  
 # TEA031223.1 Exp number of AAs in TMHs: 0.27035  
 # TEA031223.1 Exp number, first 60 AAs: 0  
 # TEA031223.1 Total prob of N-in: 0.01318  
 TEA031223.1 TMHMM2.0 outside 1 434

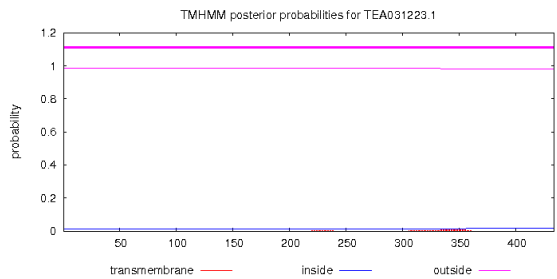

‡ **TEA007232.1** Length: 368  
 # TEA007232.1 Number of predicted TMHs: 0  
 # TEA007232.1 Exp number of AAs in TMHs: 0.04776  
 # TEA007232.1 Exp number, first 60 AAs: 0  
 # TEA007232.1 Total prob of N-in: 0.01435  
 TEA007232.1 TMHMM2.0 outside 1 368

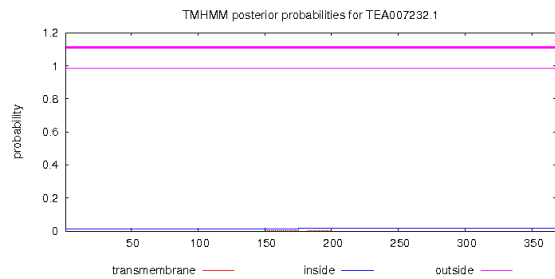

† **TEA016553.1** Length: 432  
 # TEA016553.1 Number of predicted TMHs: 0  
 # TEA016553.1 Exp number of AAs in TMHs: 0.01056  
 # TEA016553.1 Exp number, first 60 AAs: 0  
 # TEA016553.1 Total prob of N-in: 0.00632  
 TEA016553.1 TMHMM2.0 outside 1 432

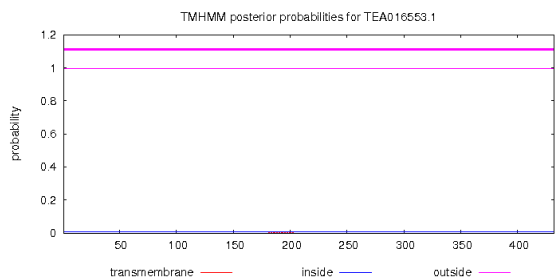

† **TEA033032.1** Length: 415  
 # TEA033032.1 Number of predicted TMHs: 0  
 # TEA033032.1 Exp number of AAs in TMHs: 0.16877  
 # TEA033032.1 Exp number, first 60 AAs: 8e-03  
 # TEA033032.1 Total prob of N-in: 0.00767  
 TEA033032.1 TMHMM2.0 outside 1 415

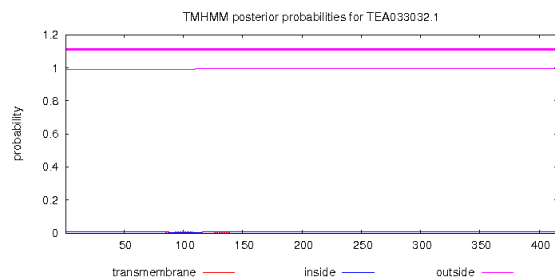

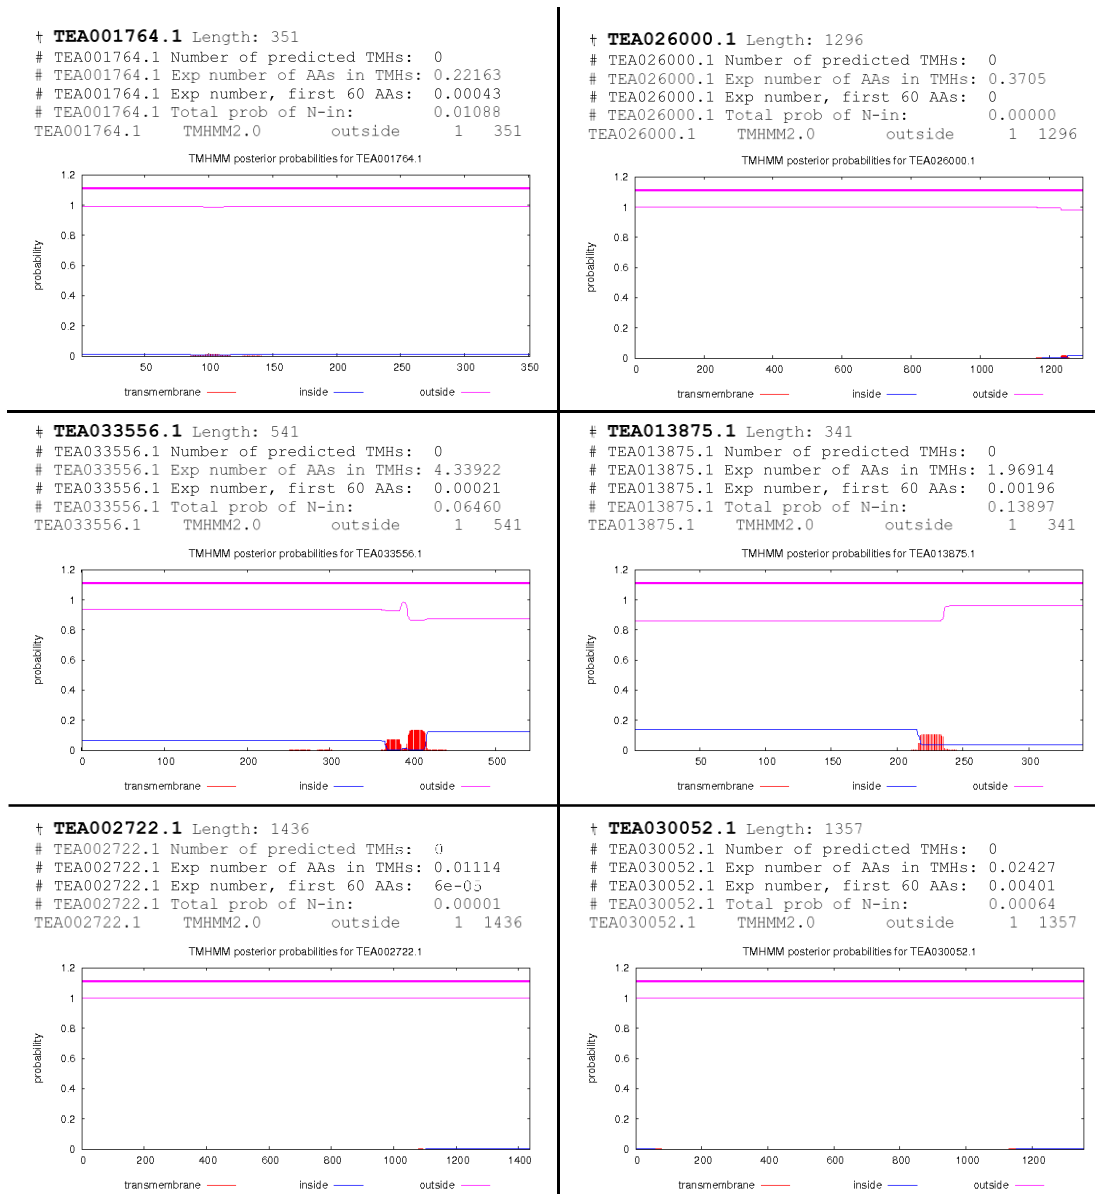

# **TEA008343.1** Length: 334  
 # TEA008343.1 Number of predicted TMHs: 0  
 # TEA008343.1 Exp number of AAs in TMHs: 0.097979999  
 # TEA008343.1 Exp number, first 60 AAs: 0  
 # TEA008343.1 Total prob of N-in: 0.02590  
 TEA008343.1 TMHMM2.0 outside 1 334

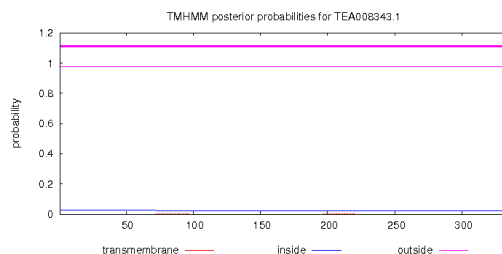

**Supplementary Figure S2:** Transmembrane helices of MAPKKKs of Raf subfamily in *C. sinensis*. TMHMM Server, v.2.0 (<http://www.cbs.dtu.dk/services/TMHMM/>), **was used to generate the transmembrane helices.**

† **TEA010125.1** Length: 675  
 # TEA010125.1 Number of predicted TMHs: 0  
 # TEA010125.1 Exp number of AAs in TMHs: 0.00052  
 # TEA010125.1 Exp number, first 60 AAs: 0  
 # TEA010125.1 Total prob of N-in: 0.00014  
 TEA010125.1 TMHMM2.0 outside 1 675

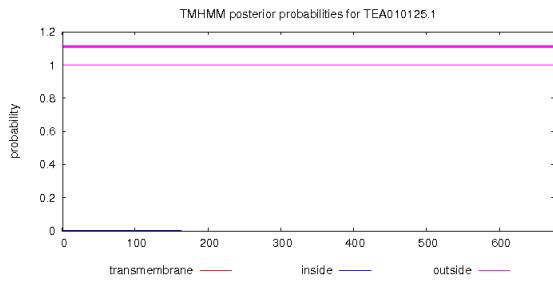

# **TEA022762.1** Length: 732  
 # TEA022762.1 Number of predicted TMHs: 0  
 # TEA022762.1 Exp number of AAs in TMHs: 0.01389  
 # TEA022762.1 Exp number, first 60 AAs: 0.01054  
 # TEA022762.1 Total prob of N-in: 0.00094  
 TEA022762.1 TMHMM2.0 outside 1 732

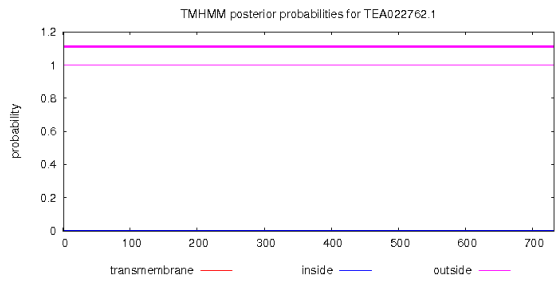

# **TEA024720.1** Length: 655  
 # TEA024720.1 Number of predicted TMHs: 0  
 # TEA024720.1 Exp number of AAs in TMHs: 0.20568  
 # TEA024720.1 Exp number, first 60 AAs: 0.00353  
 # TEA024720.1 Total prob of N-in: 0.01086  
 TEA024720.1 TMHMM2.0 outside 1 655

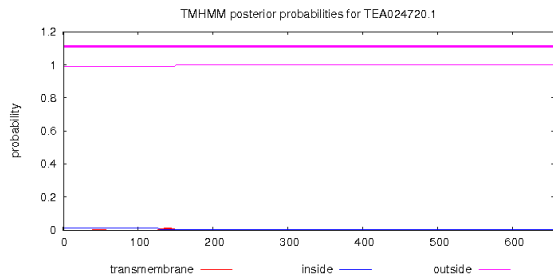

# **TEA002087.1** Length: 719  
 # TEA002087.1 Number of predicted TMHs: 0  
 # TEA002087.1 Exp number of AAs in TMHs: 0.00067  
 # TEA002087.1 Exp number, first 60 AAs: 0  
 # TEA002087.1 Total prob of N-in: 0.00011  
 TEA002087.1 TMHMM2.0 outside 1 719

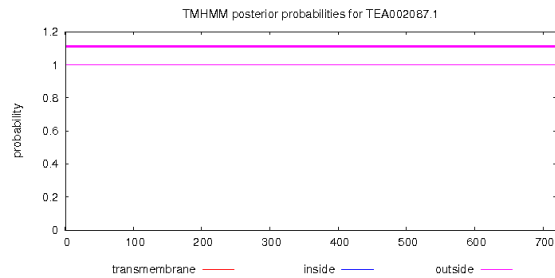

† **TEA013346.1** Length: 831  
 # TEA013346.1 Number of predicted TMHs: 0  
 # TEA013346.1 Exp number of AAs in TMHs: 0.00018  
 # TEA013346.1 Exp number, first 60 AAs: 0  
 # TEA013346.1 Total prob of N-in: 0.00002  
 TEA013346.1 TMHMM2.0 outside 1 831

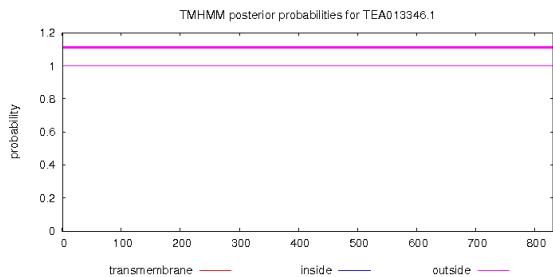

† **TEA013344.1** Length: 481  
 # TEA013344.1 Number of predicted TMHs: 0  
 # TEA013344.1 Exp number of AAs in TMHs: 0.00164  
 # TEA013344.1 Exp number, first 60 AAs: 0  
 # TEA013344.1 Total prob of N-in: 0.00069  
 TEA013344.1 TMHMM2.0 outside 1 481

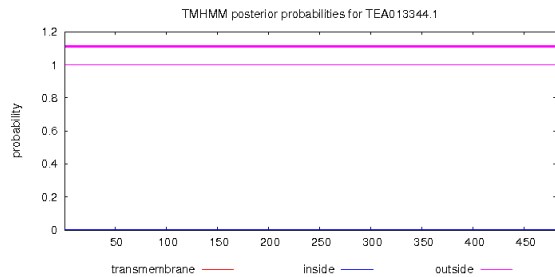

± **TEA031068.1** Length: 762  
 # TEA031068.1 Number of predicted TMHs: 0  
 # TEA031068.1 Exp number of AAs in TMHs: 3.06785  
 # TEA031068.1 Exp number, first 60 AAs: 1.30494  
 # TEA031068.1 Total prob of N-in: 0.06089  
 TEA031068.1 TMHMM2.0 outside 1 762

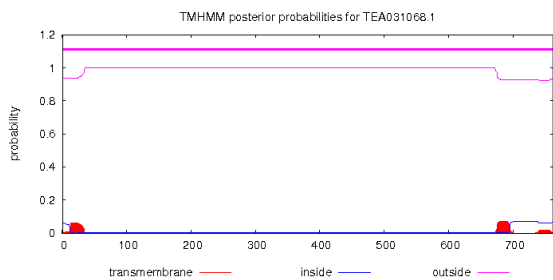

# **TEA020698.1** Length: 664  
 # TEA020698.1 Number of predicted TMHs: 0  
 # TEA020698.1 Exp number of AAs in TMHs: 1.53983  
 # TEA020698.1 Exp number, first 60 AAs: 0.00118  
 # TEA020698.1 Total prob of N-in: 0.00060  
 TEA020698.1 TMHMM2.0 outside 1 664

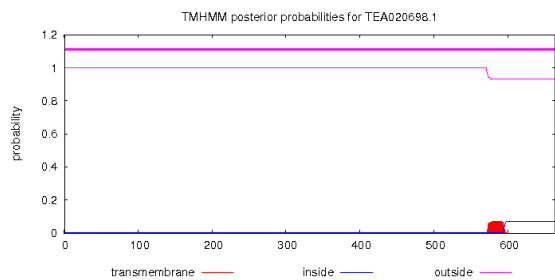



```

# TEA027328.1 Length: 748
# TEA027328.1 Number of predicted TMHs: 1
# TEA027328.1 Exp number of AAs in TMHs: 30.33445
# TEA027328.1 Exp number, first 60 AAs: 29.76268
# TEA027328.1 Total prob of N-in: 0.47196
# TEA027328.1 POSSIBLE N-term signal sequence
TEA027328.1 TMHMM2.0 inside 1 39
TEA027328.1 TMHMM2.0 TMhelix 40 58
TEA027328.1 TMHMM2.0 outside 59 748

```

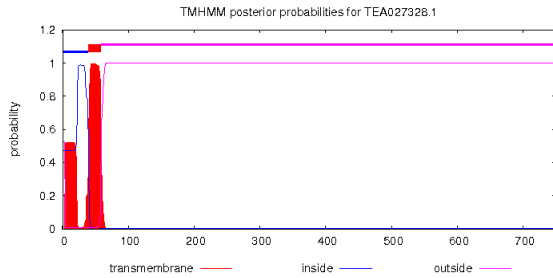

```

# TEA020112.1 Length: 300
# TEA020112.1 Number of predicted TMHs: 0
# TEA020112.1 Exp number of AAs in TMHs: 0.00508
# TEA020112.1 Exp number, first 60 AAs: 0
# TEA020112.1 Total prob of N-in: 0.01462
TEA020112.1 TMHMM2.0 outside 1 300

```

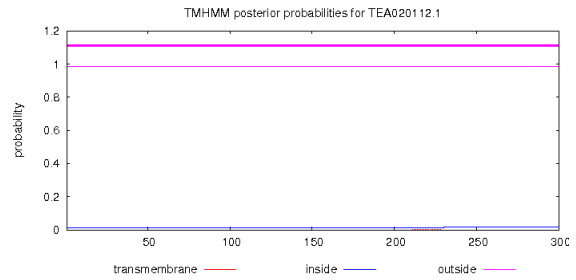

```

# TEA033250.1 Length: 622
# TEA033250.1 Number of predicted TMHs: 0
# TEA033250.1 Exp number of AAs in TMHs: 0.00119
# TEA033250.1 Exp number, first 60 AAs: 0
# TEA033250.1 Total prob of N-in: 0.00024
TEA033250.1 TMHMM2.0 outside 1 622

```

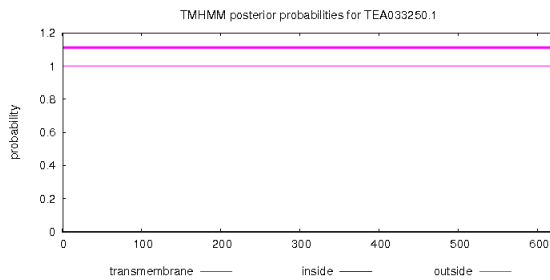

**Supplementary Figure S3:** Transmembrane helices of MAPKKKs of ZIK subfamily in *C. sinensis*. TMHMM Server, v.2.0 (<http://www.cbs.dtu.dk/services/TMHMM/>), **was used to generate the transmembrane helices.**

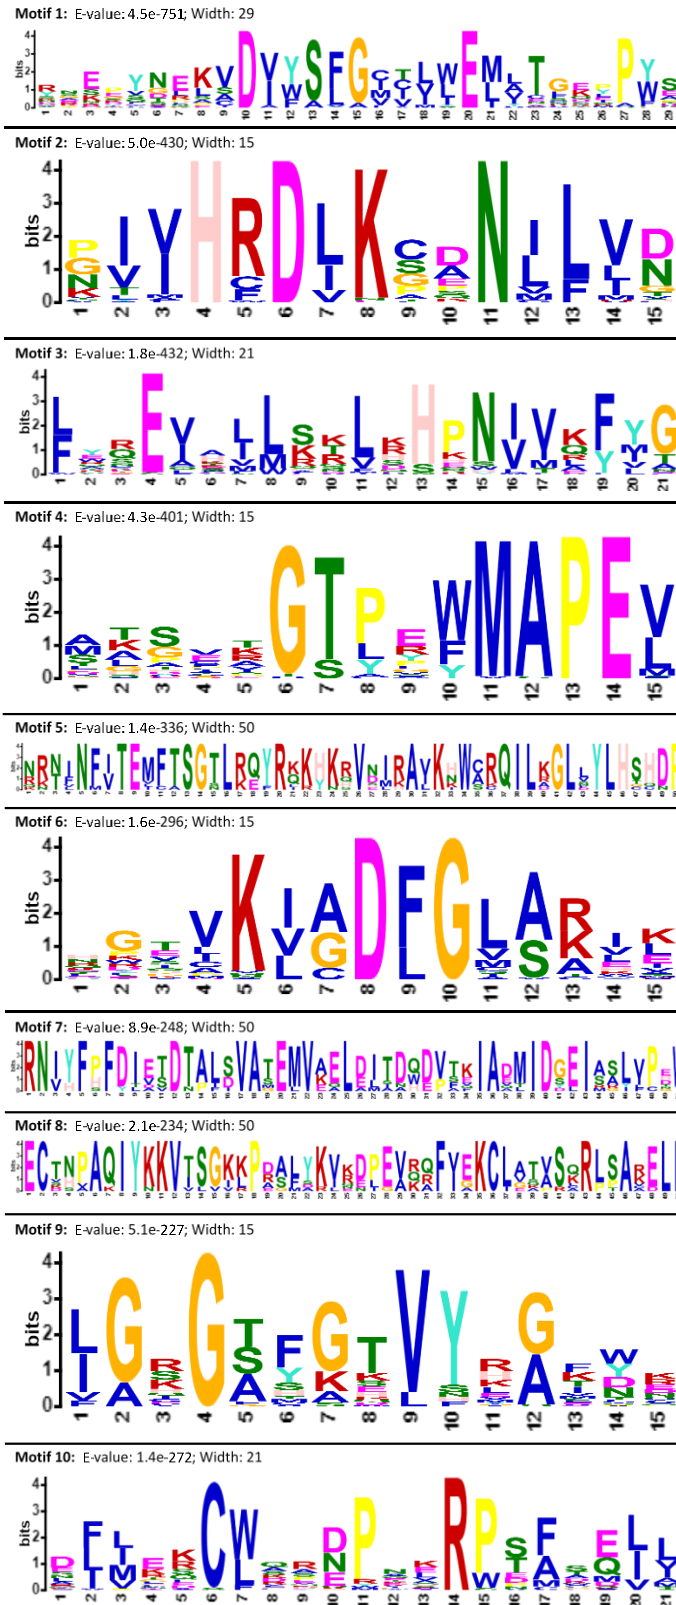

**Supplementary Figure S4:** Motif logos of the 10 identified motifs in 59 MAPKKs  *C. sinensis*. The motif logos were generated by MEME suite.

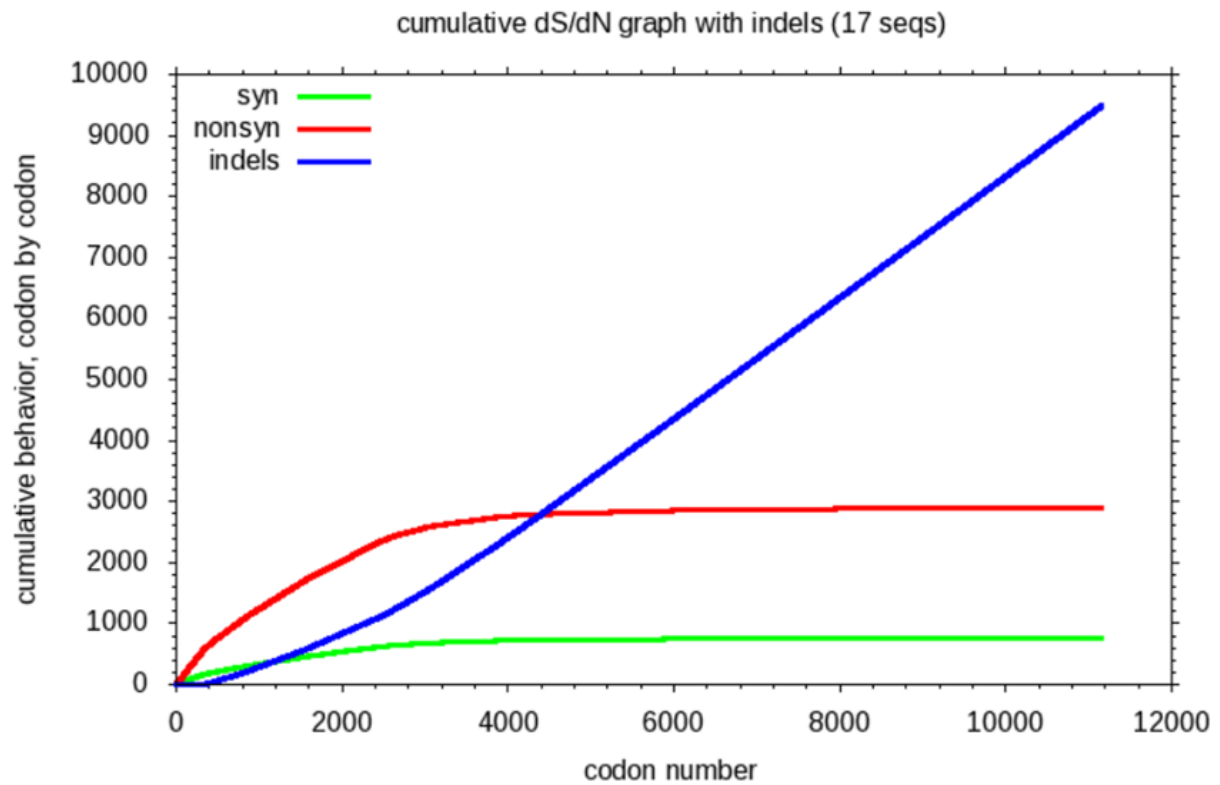

**Supplementary Figure S5:** The ds/dn cumulative graph of MAPKKKs of MEKK subfamily in *C. sinensis*. SNAP server (<https://www.hiv.lanl.gov/content/sequence/SNAP/SNAP.html>) has been used to generate the graph.

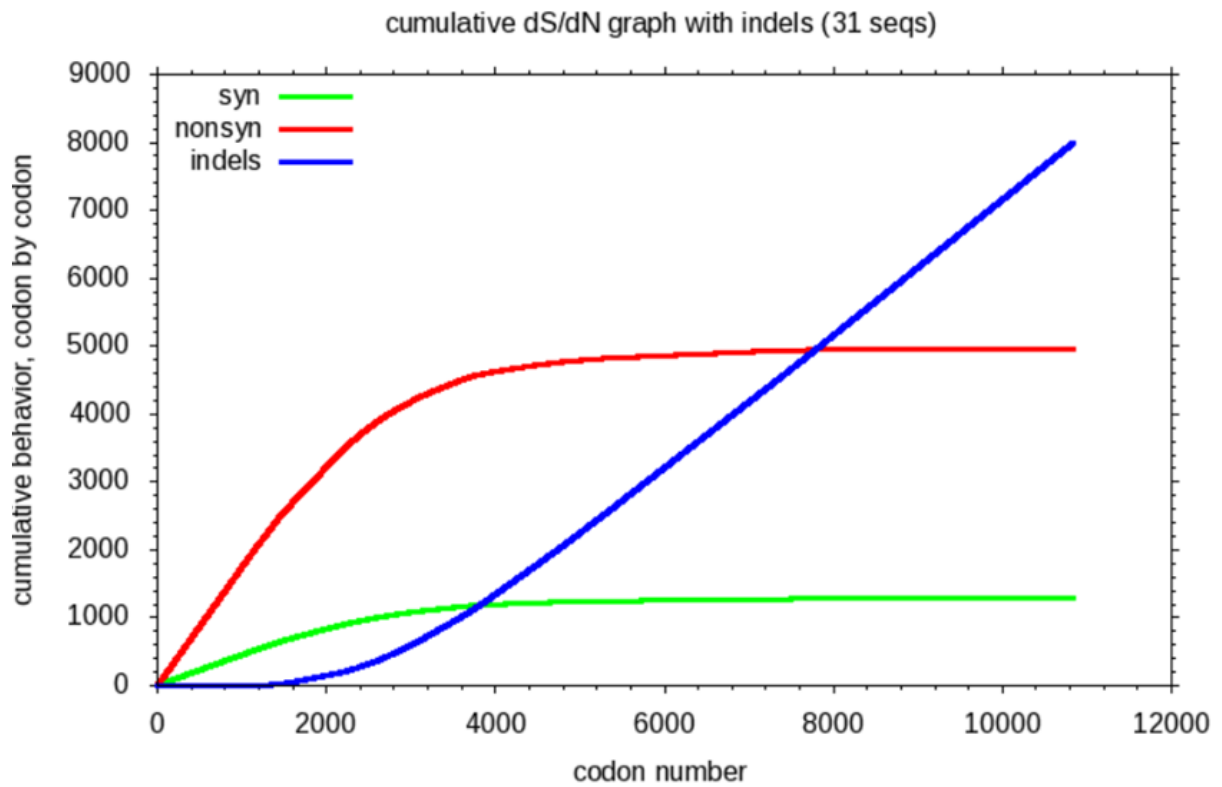

**Supplementary Figure S6:** The ds/dn cumulative graph of MAPKKs of Raf subfamily in *C. sinensis*. SNAP server (<https://www.hiv.lanl.gov/content/sequence/SNAP/SNAP.html>) has been used to generate the graph.

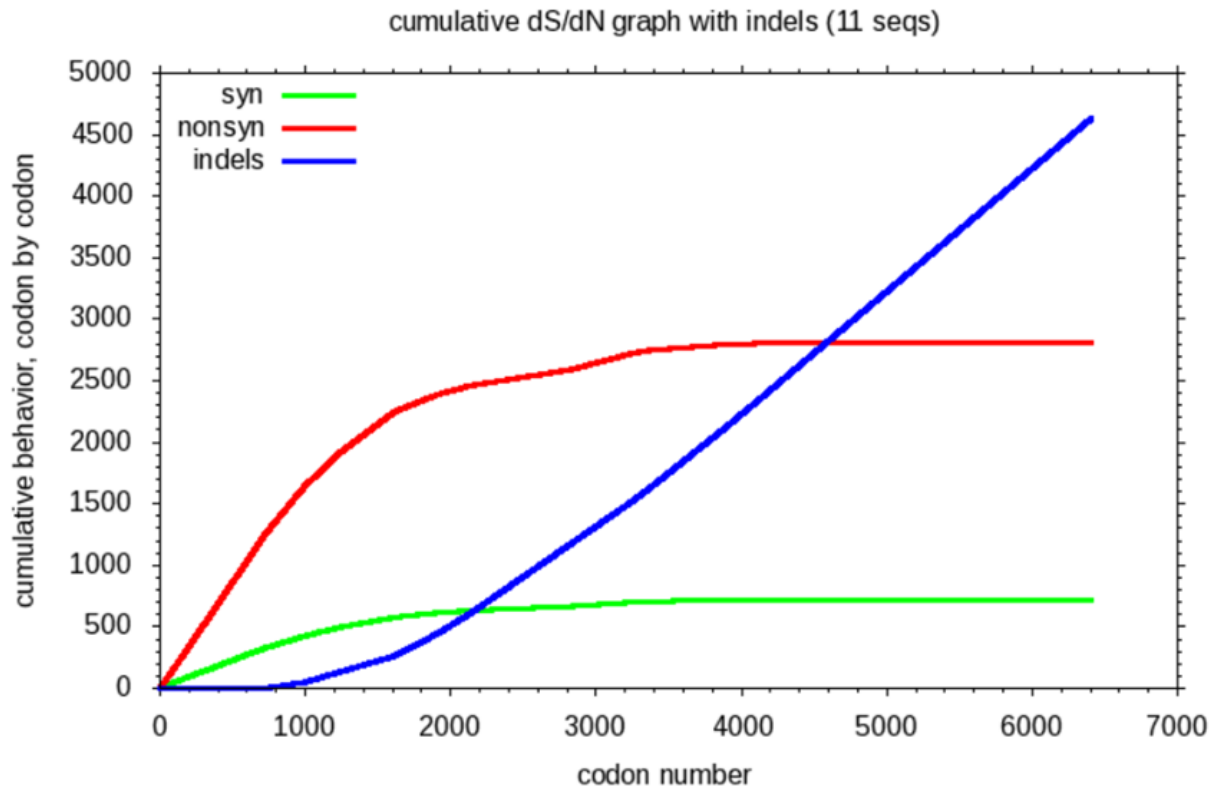

**Supplementary Figure S7:** The ds/dn cumulative graph of MAPKKKs of ZIK subfamily in *C. sinensis*. SNAP server (<https://www.hiv.lanl.gov/content/sequence/SNAP/SNAP.html>) has been used to generate the graph.

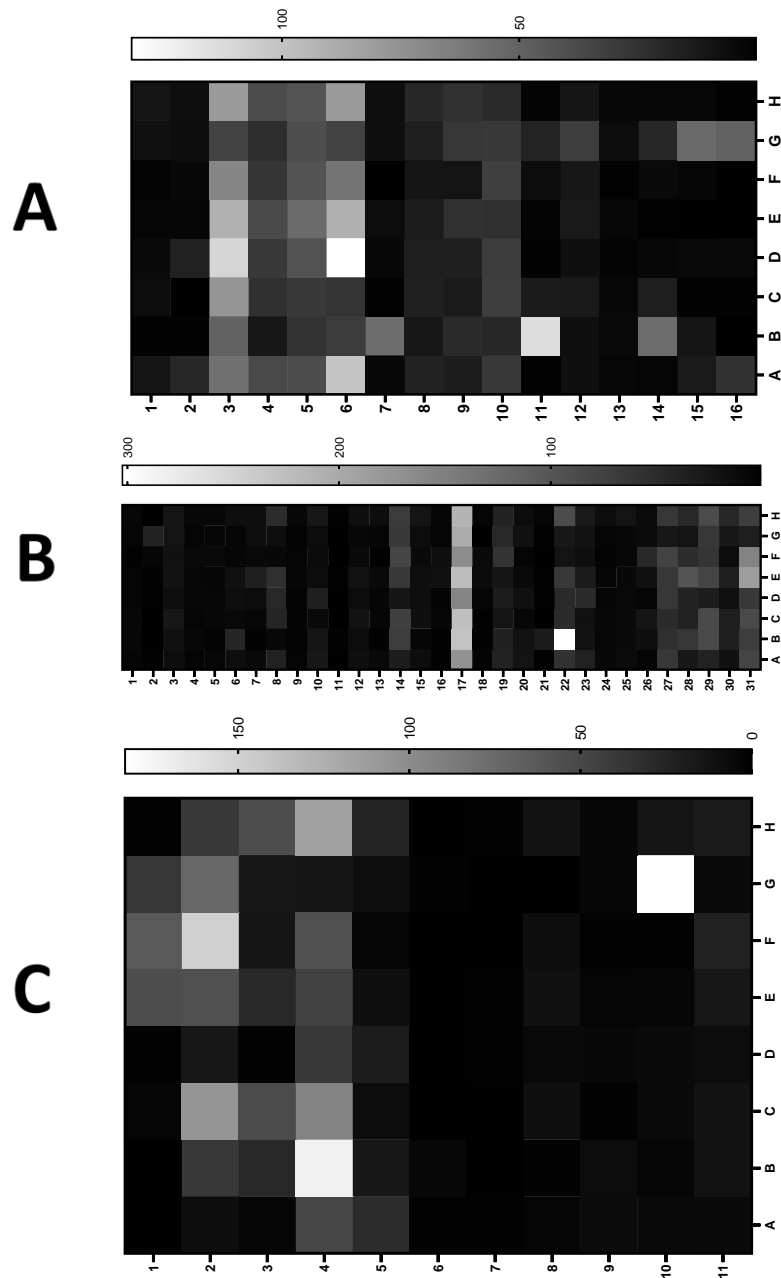

**Supplementary Figure S8:** Heat maps for tissue-specific expression patterns of A) MEKK; B) Raf and; C) ZIK genes in *C. sinensis*. The relative expression of these genes was analysed in different developmental stages, by using GraphPad Prism 8 software. The level of expression was in transcript per million (TPM). The numbers below represent the tea MAPKKK genes and the alphabets on the right represent the 8 different tissues.

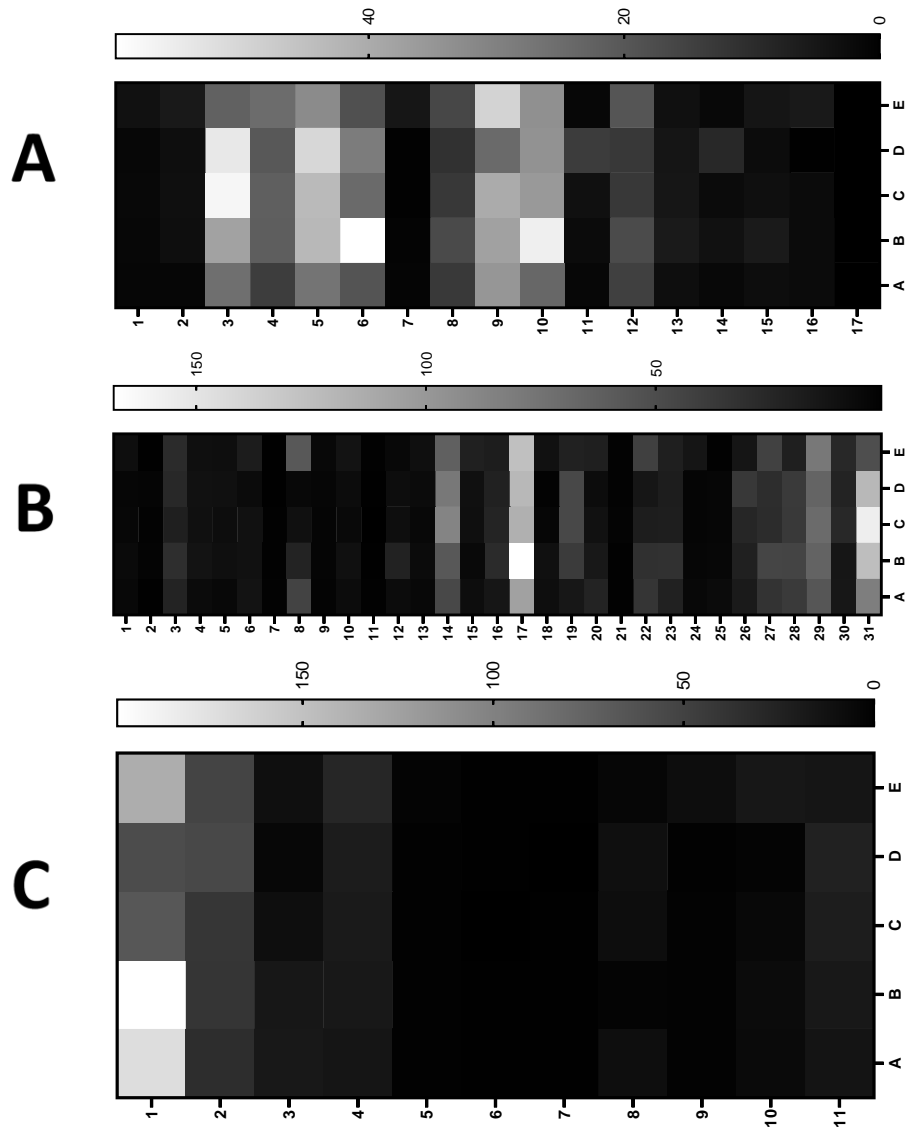

**Supplementary Figure S9: Heat maps for cold stress expression patterns of A) MEKK; B) Raf and; C) ZIK genes in *C. sinensis*.** The relative expression of these genes was analysed in different developmental stages, by using GraphPad Prism 8 software. The level of expression was in transcript per million (TPM). The numbers below represent the tea MAPKKK genes and the alphabets on the right represent the parameters of study.

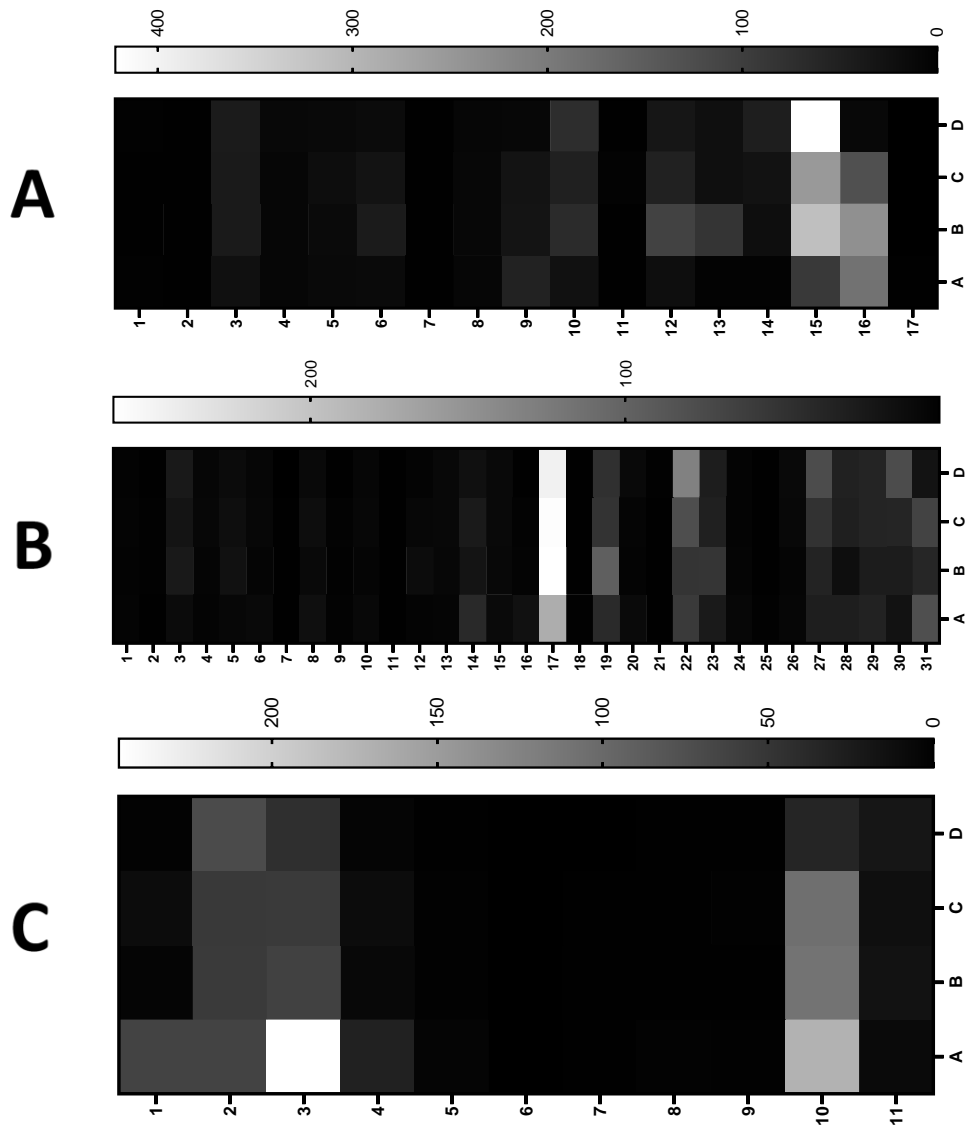

**Supplementary Figure S10:** Heat maps for drought stress expression patterns of A) MEKK; B) Raf and; C) ZIK genes in *C. sinensis*. The relative expression of these genes was analysed in different developmental stages, by using GraphPad Prism 8 software. The level of expression was in transcript per million (TPM). The numbers below represent the tea MAPKKK genes and the alphabets on the right represent the parameters of study.



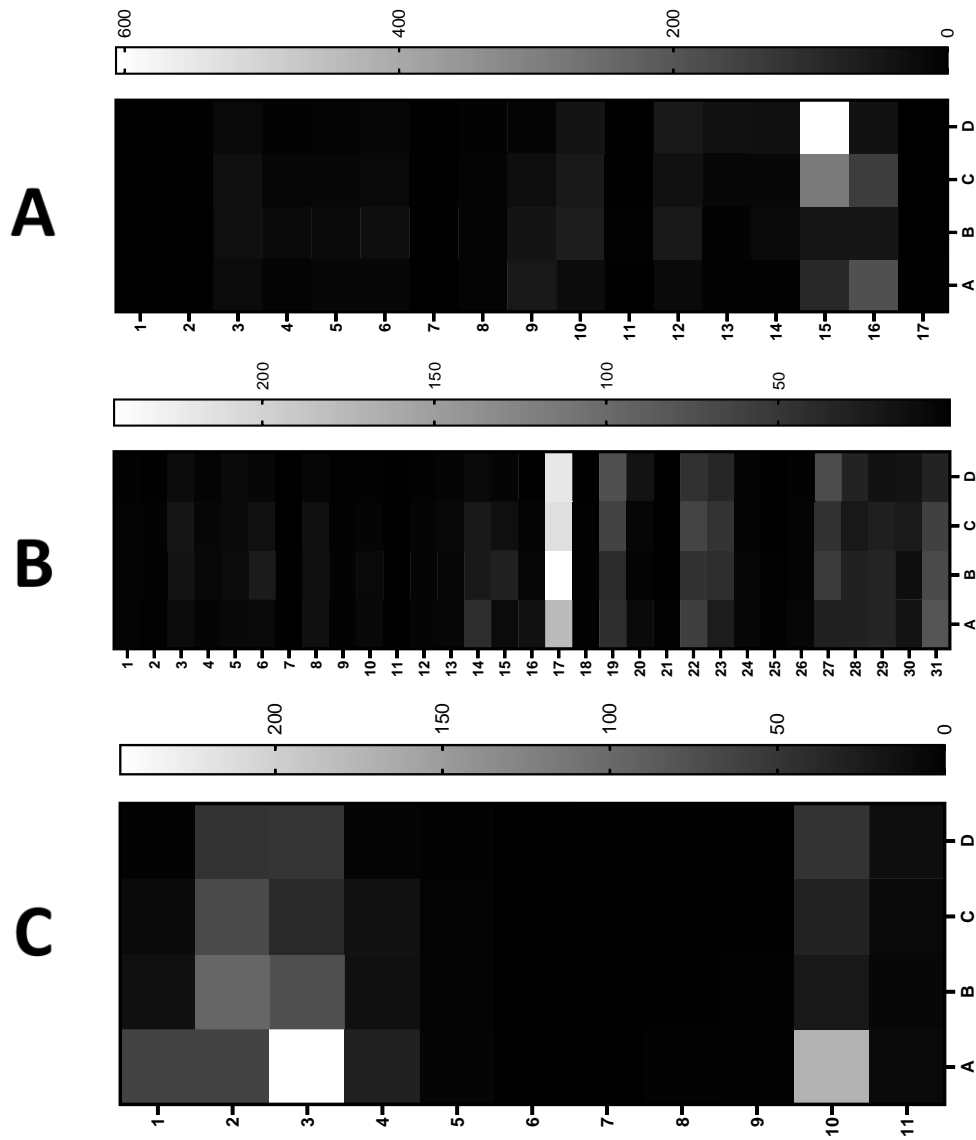

**Supplementary Figure S11:** Heat maps for salt stress expression patterns of (A) MEKK (B) Raf and (C) ZIK genes in *C. sinensis*. The relative expression of these genes was analysed in different developmental stages, by using GraphPad Prism 8 software. The level of expression was in transcript per million (TPM). The numbers below represent the tea MAPKKK genes and the alphabets on the right represent the parameters of study.

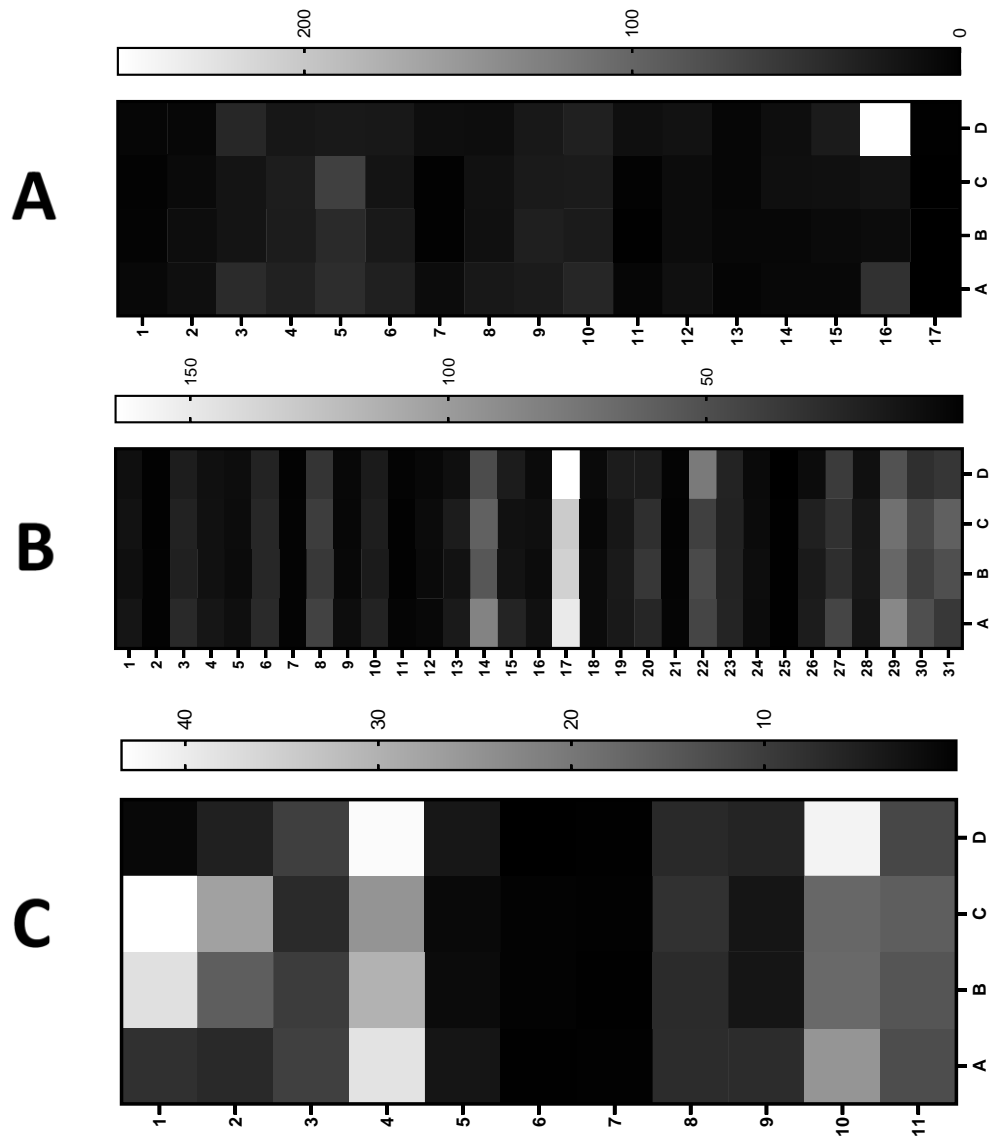

**Supplementary Figure S12:** Heat maps for MeJA treatment expression patterns of (A) MEKK (B) Raf and (C) ZIK genes in *C. sinensis*. The relative expression of these genes was analysed in different developmental stages, by using GraphPad Prism 8 software. The level of expression was in transcript per million (TPM). The numbers below represent the tea MAPKKK genes and the alphabets on the right represent the parameters of study.
